# Supplementary material
Source: MDPI journal article supplement (https://www.mdpi.com/2072-4292/12/8/1254)

SAMOSA

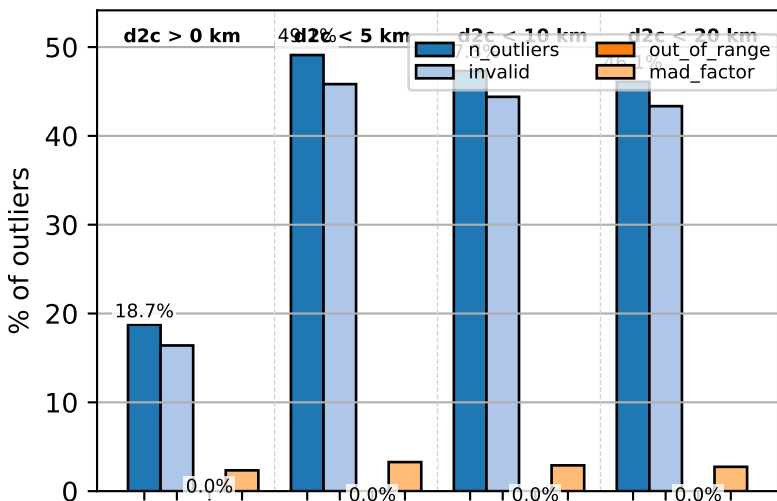

WHALES-SAR

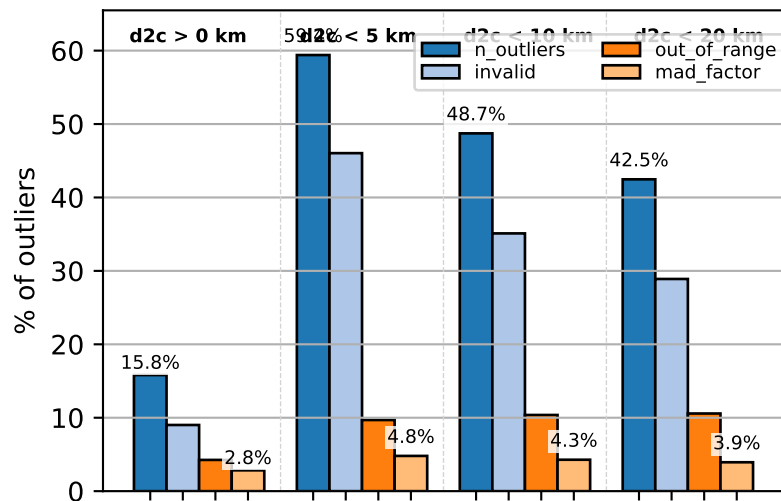

DeDop-Waver

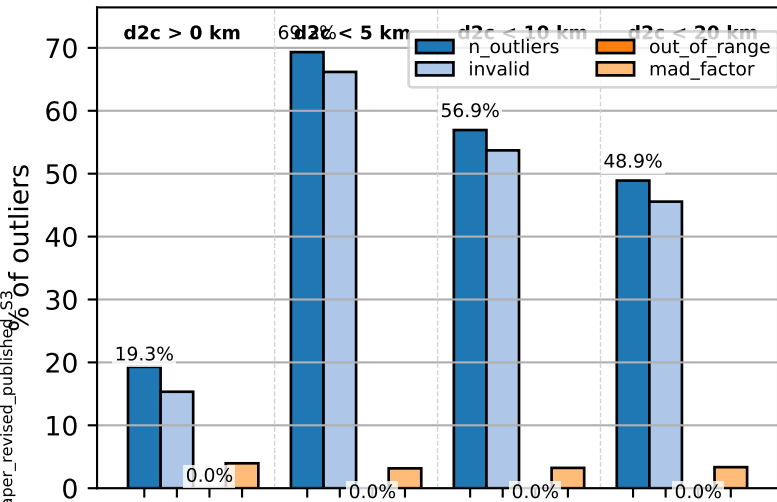

LR-RMC

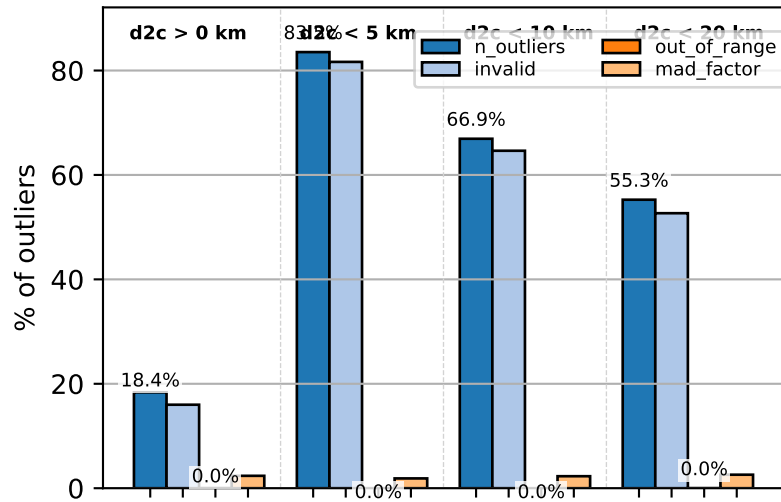

LR-RMC\_HFA

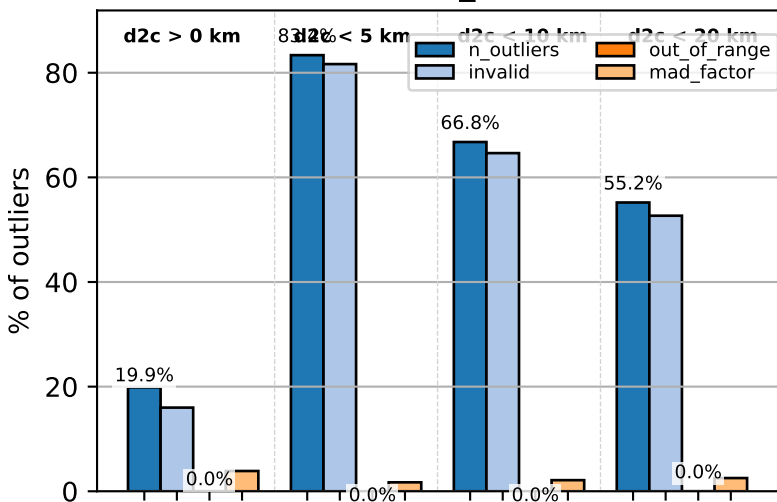

MLE-4-PLRM

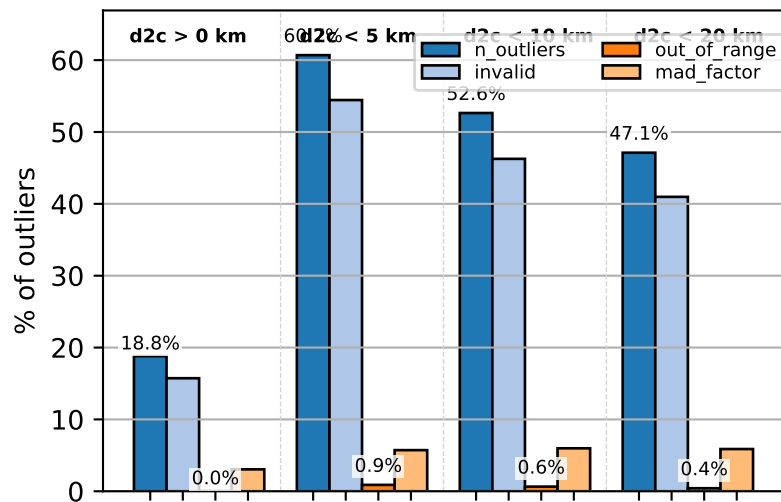

TALES-PLRM

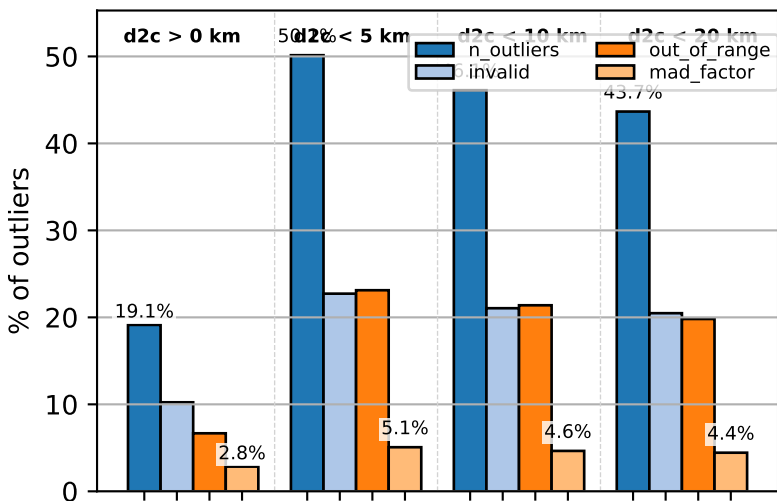

STARv2-PLRM

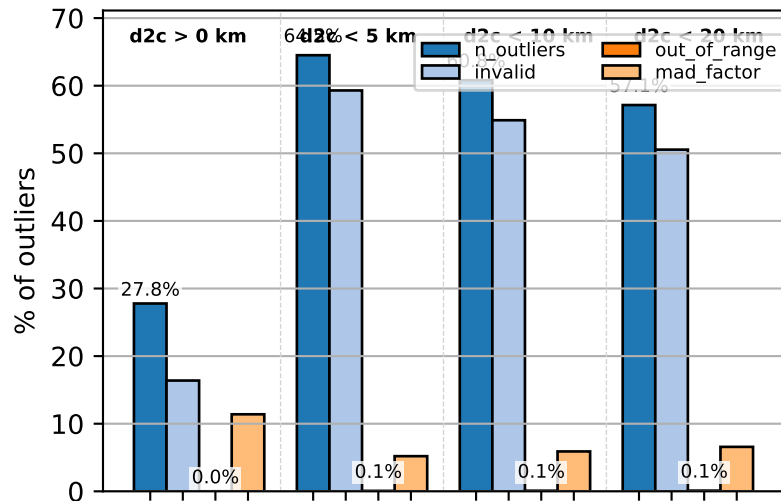

n\_outliers

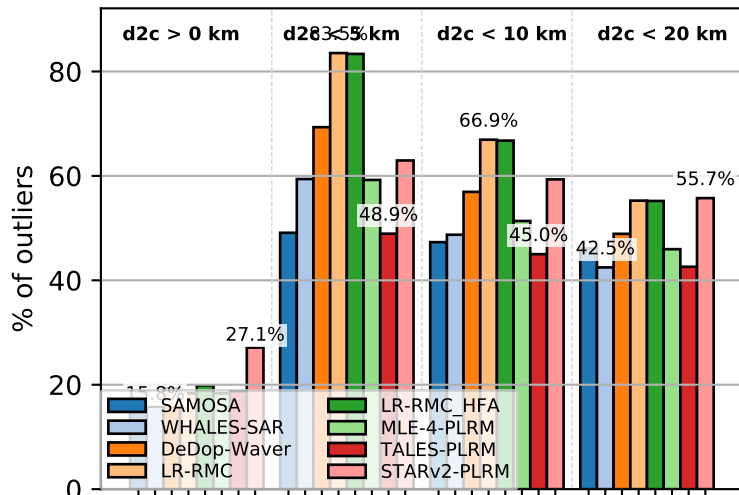

invalid

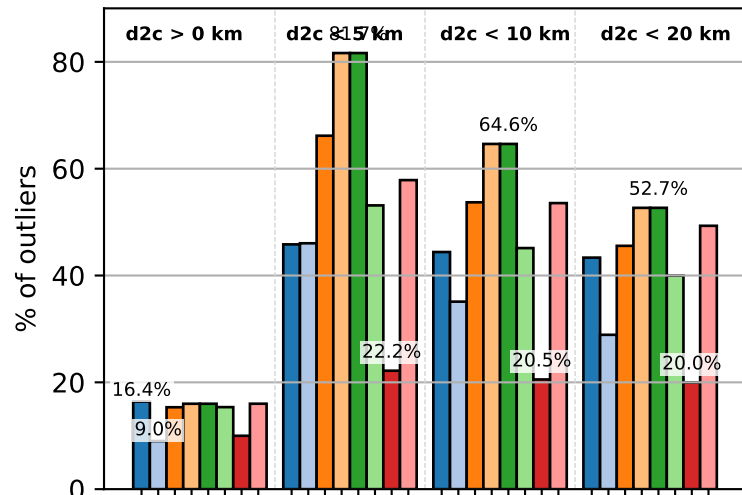

out\_of\_range

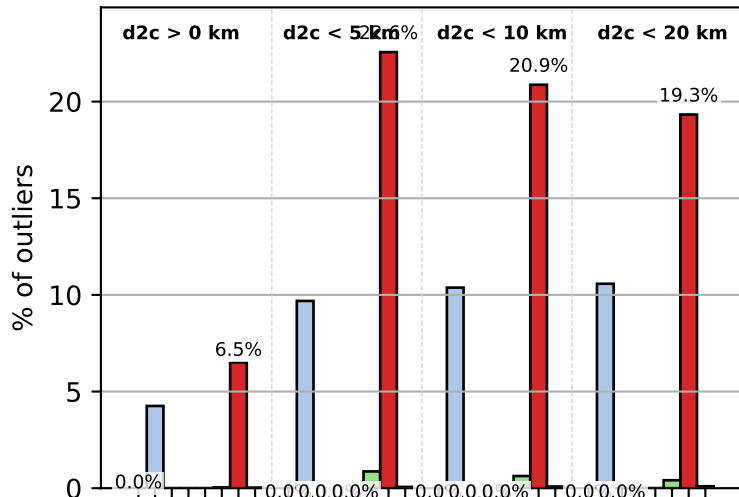

mad\_factor

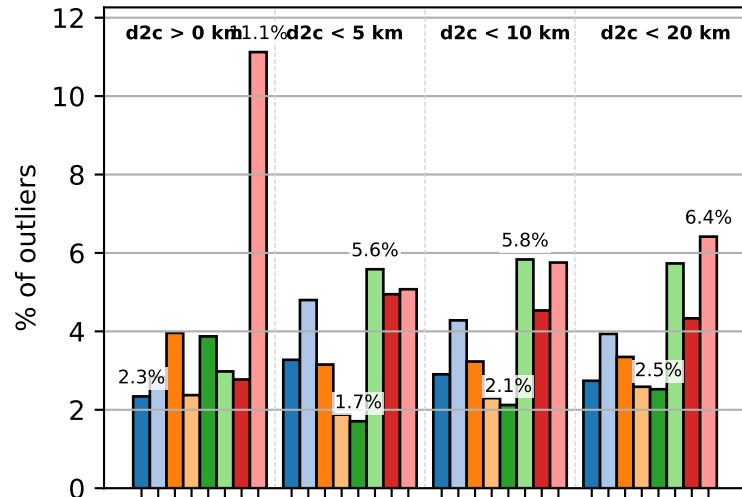

n\_valid

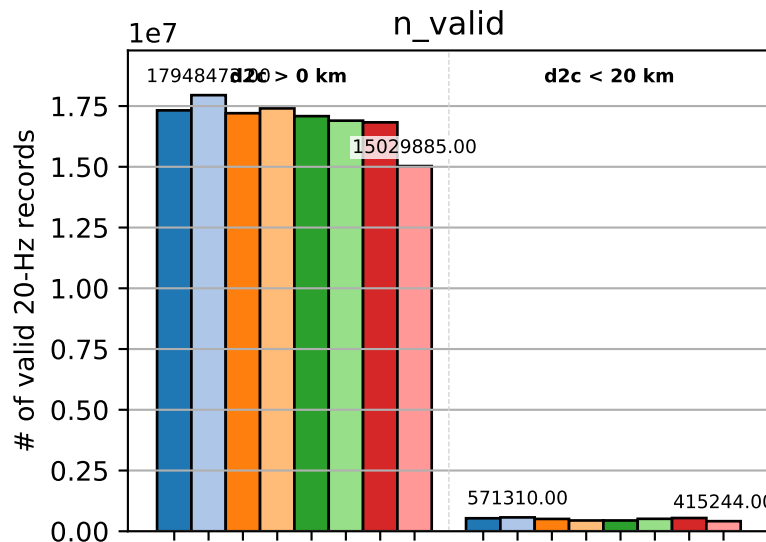

n\_valid

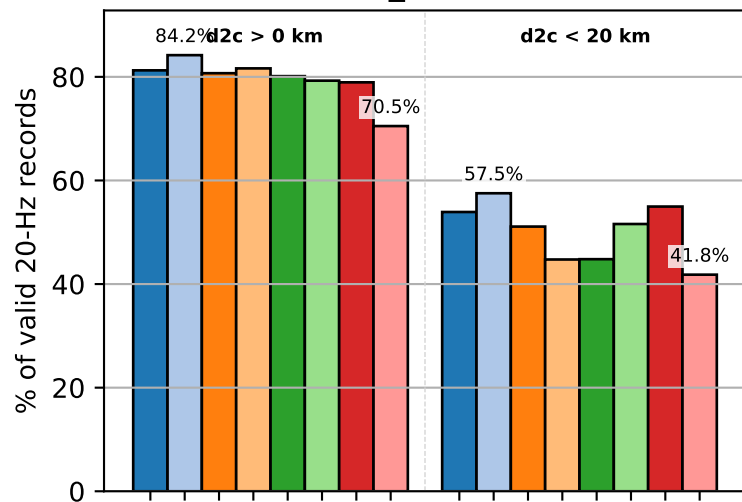

n\_valid

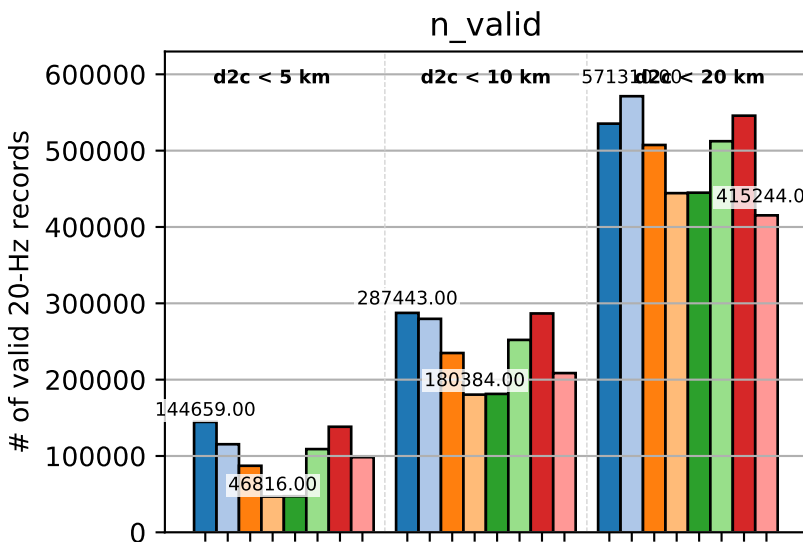

n\_valid

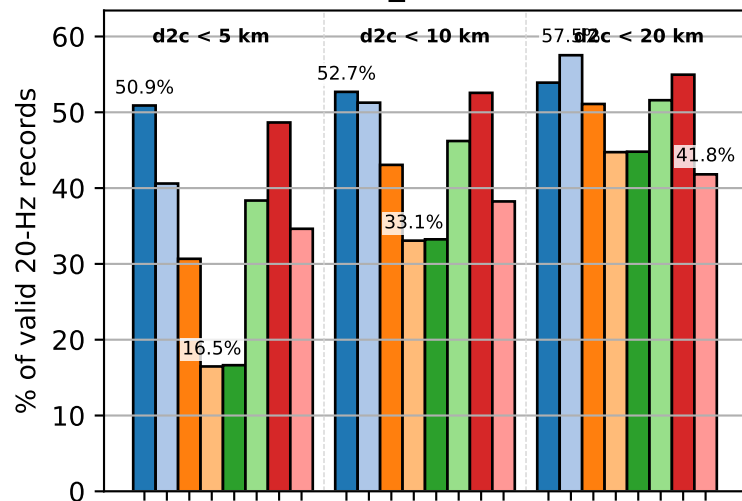

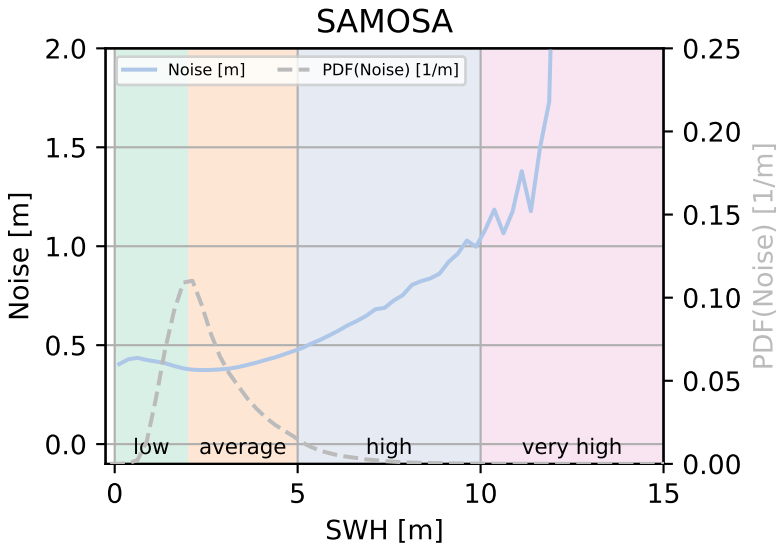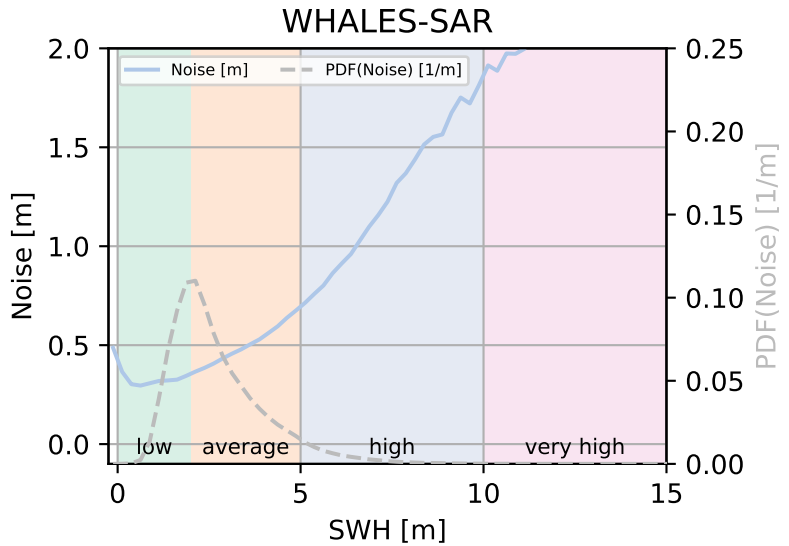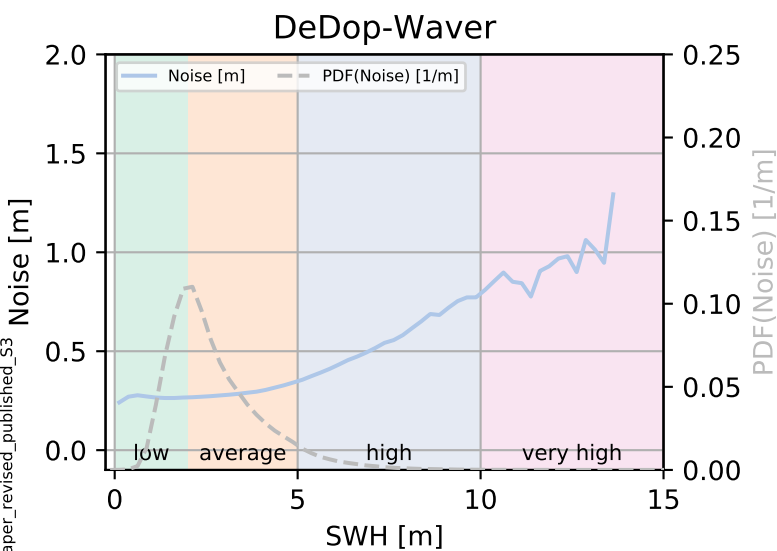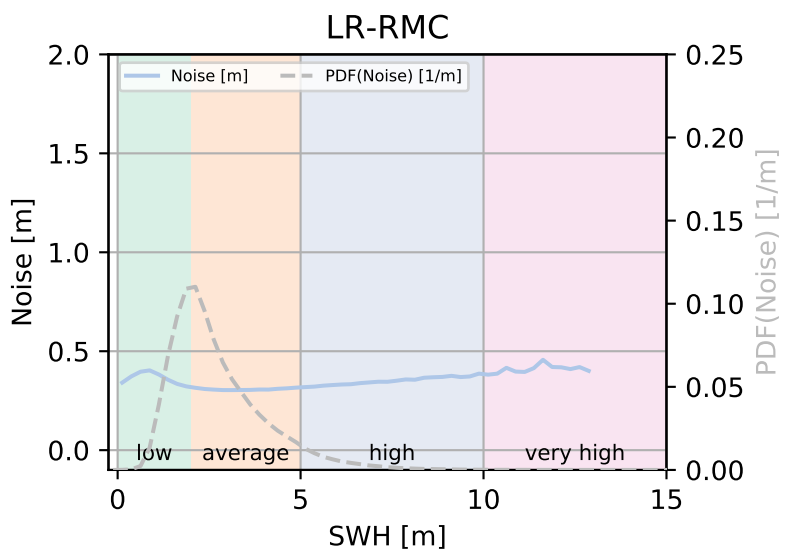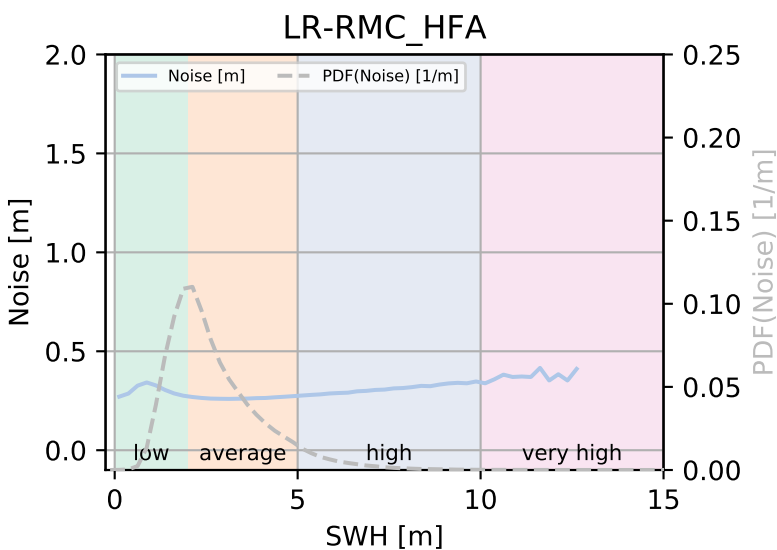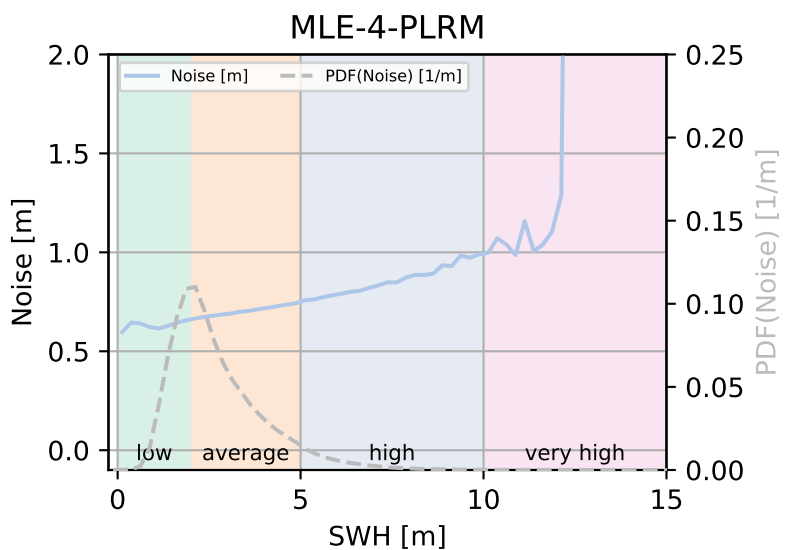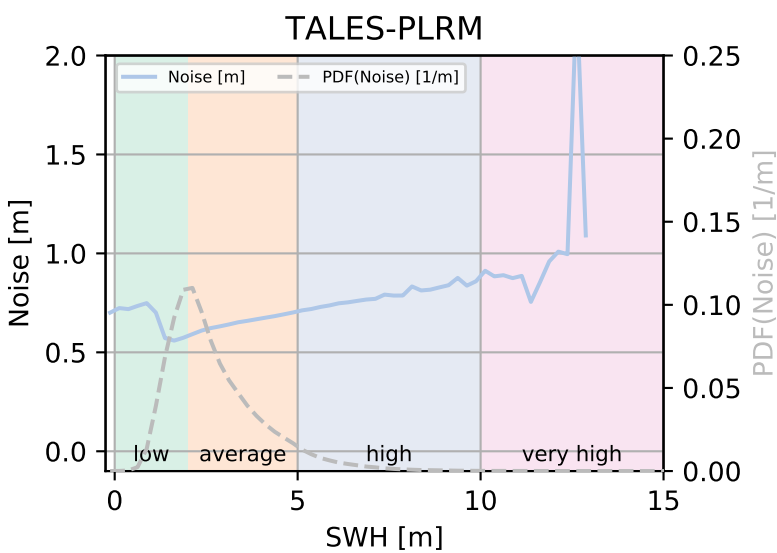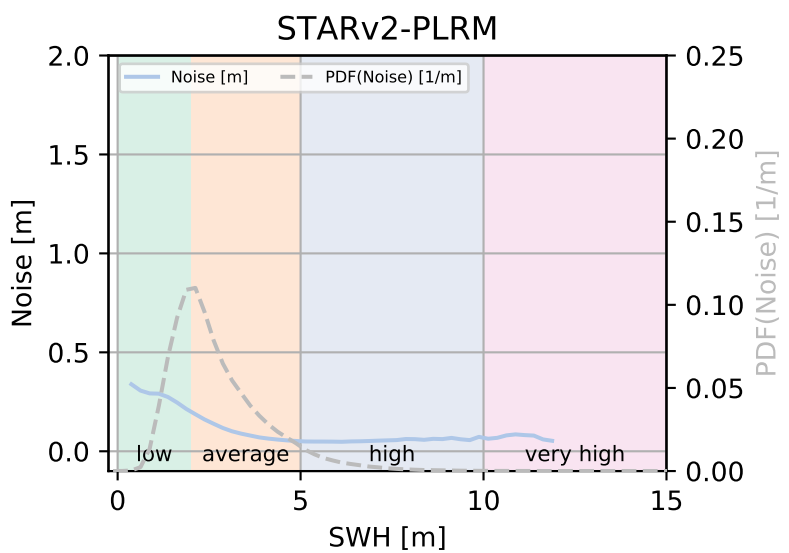

Noise comparisons

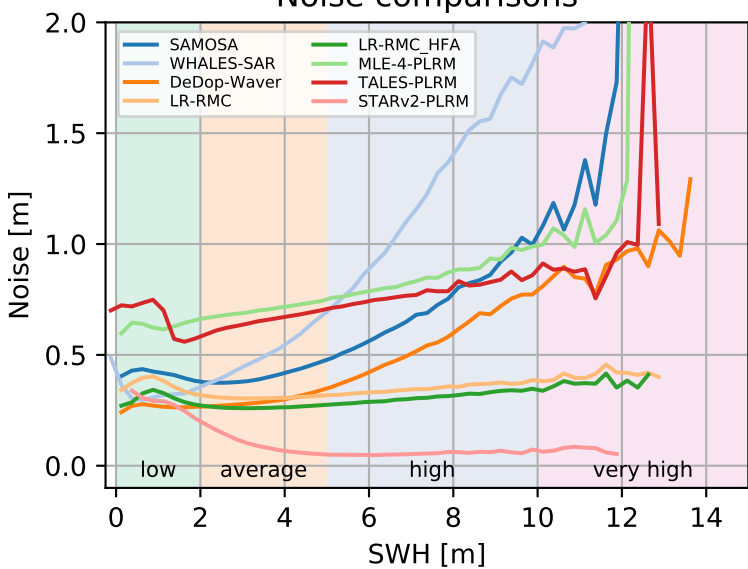

Noise comparisons, dist2coast &lt;= 20km

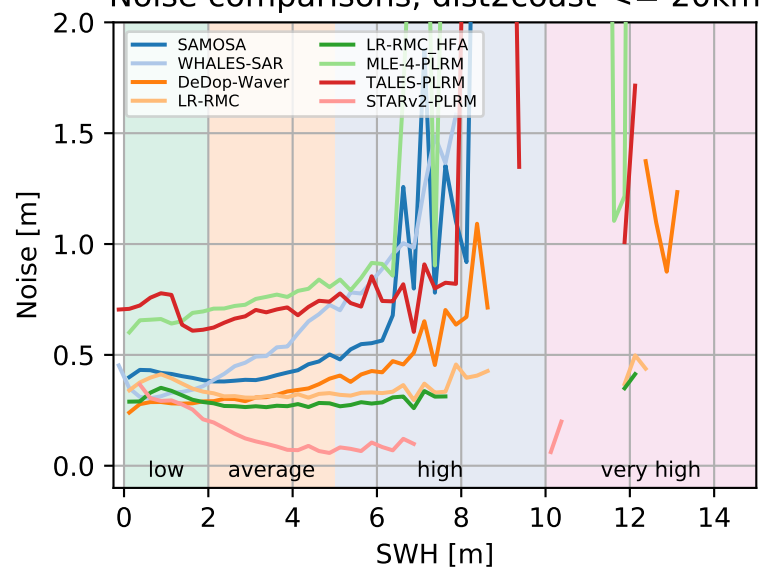

paper\_revised\_published\_S3

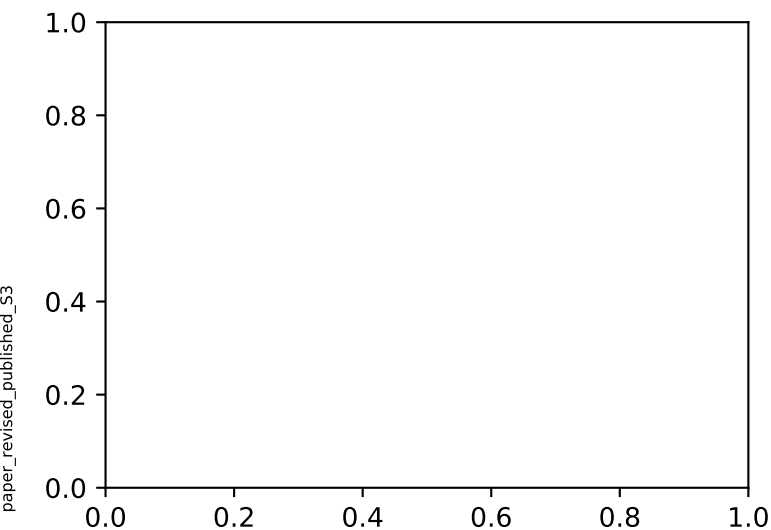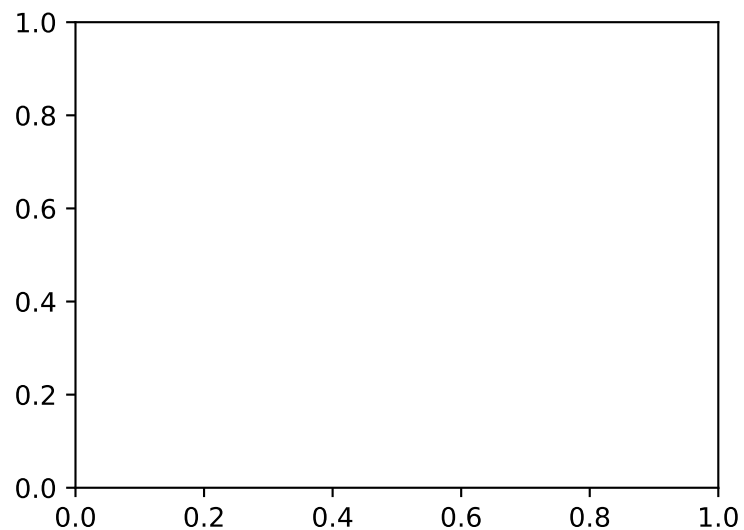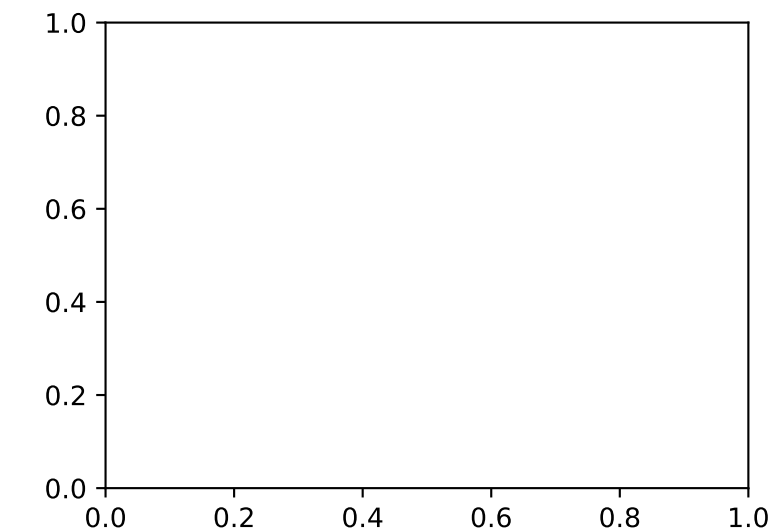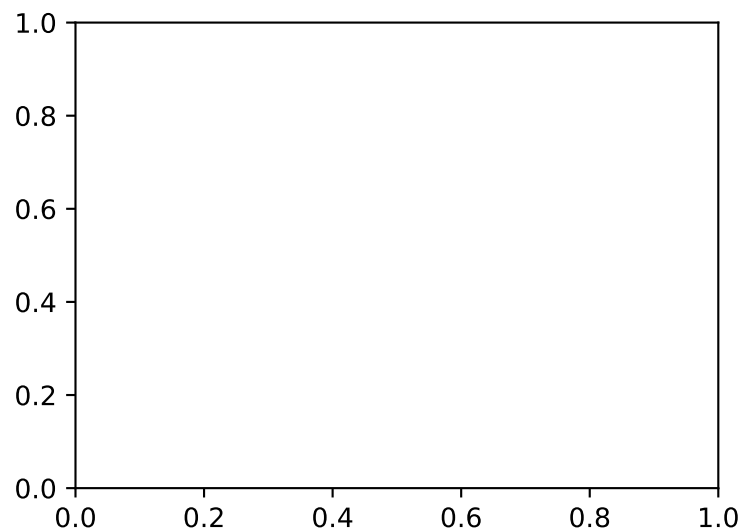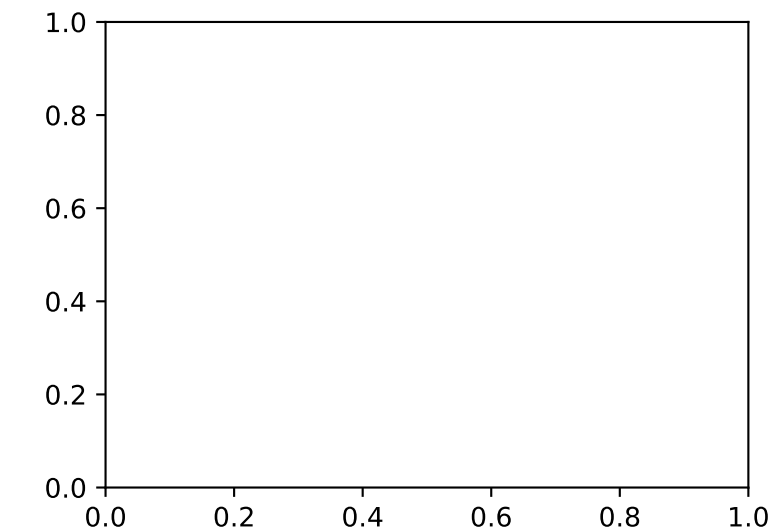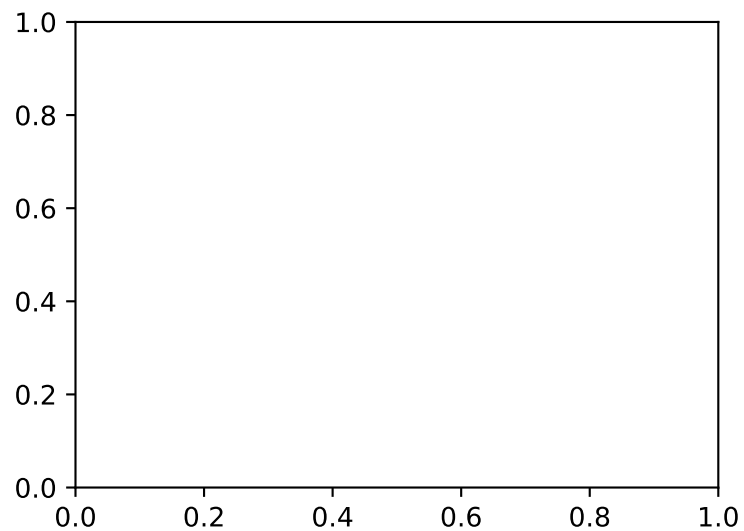

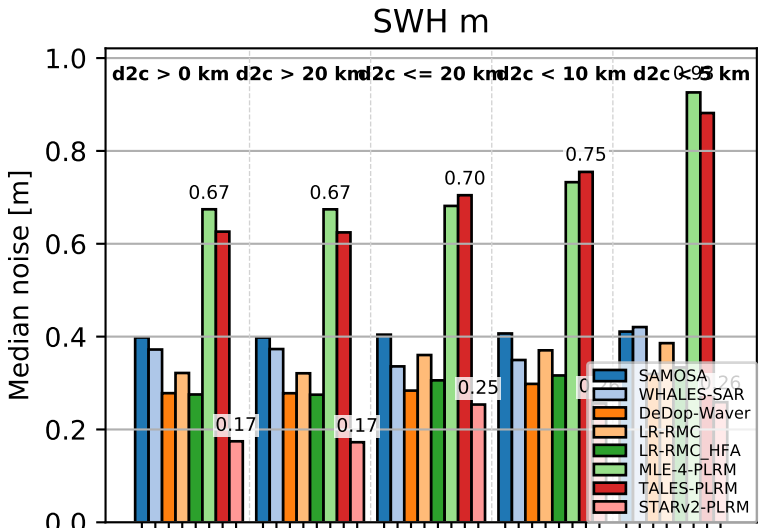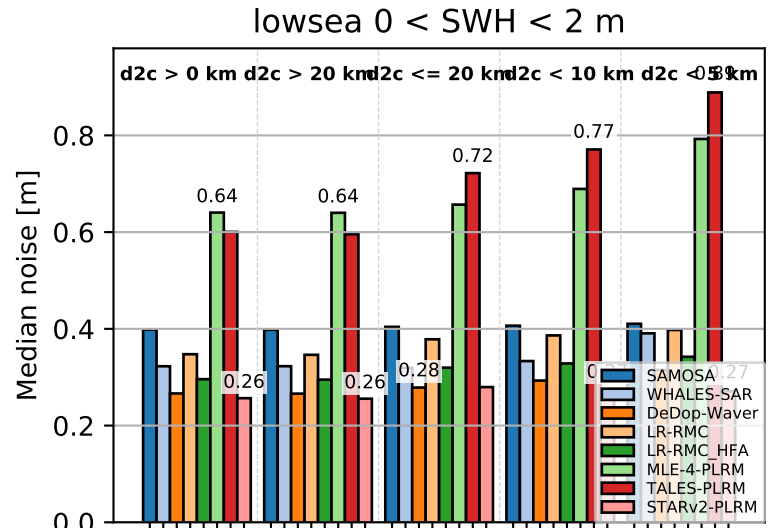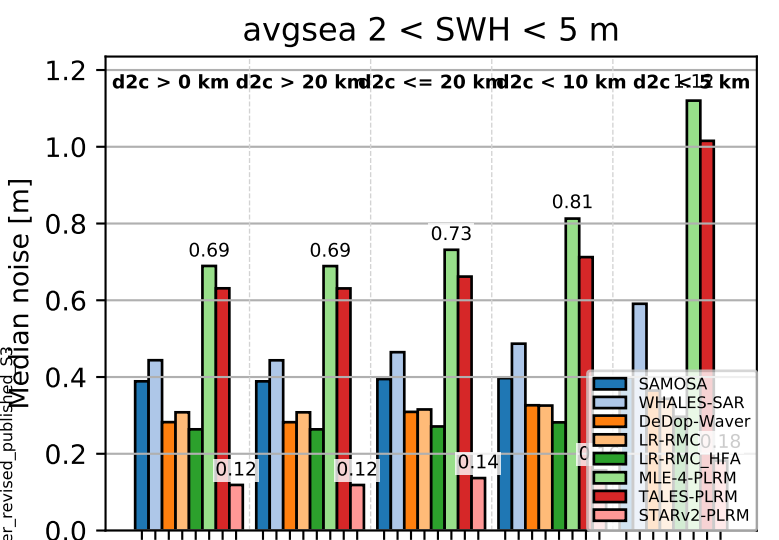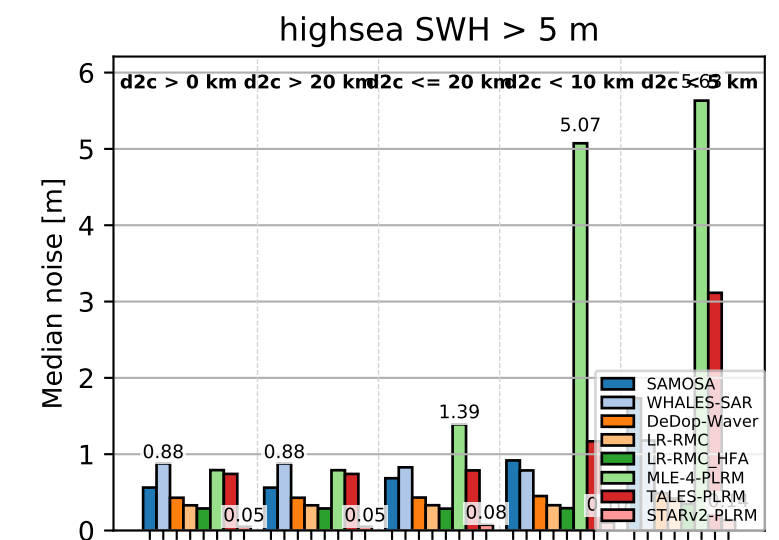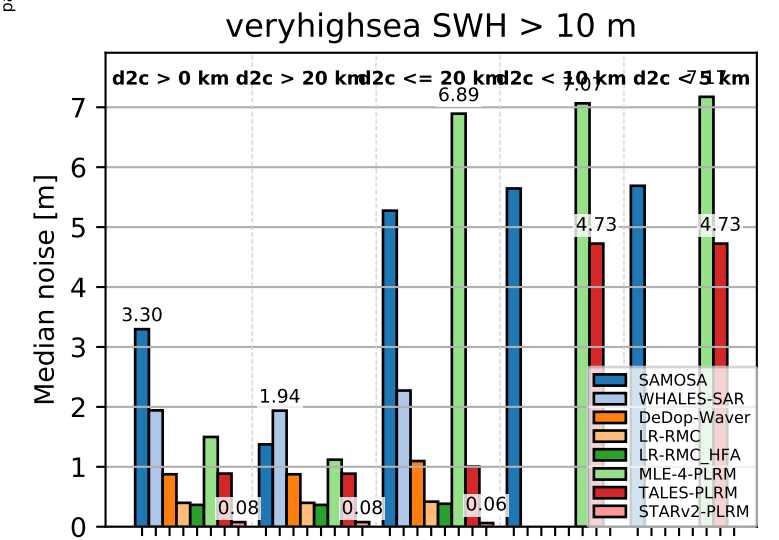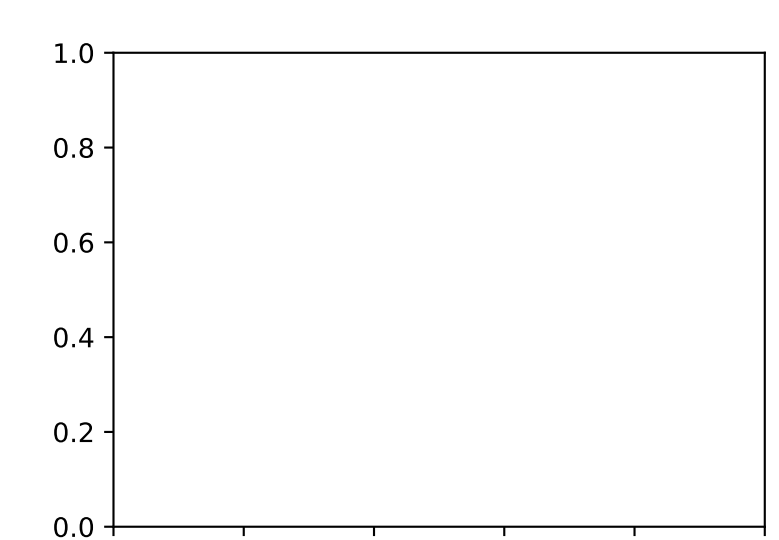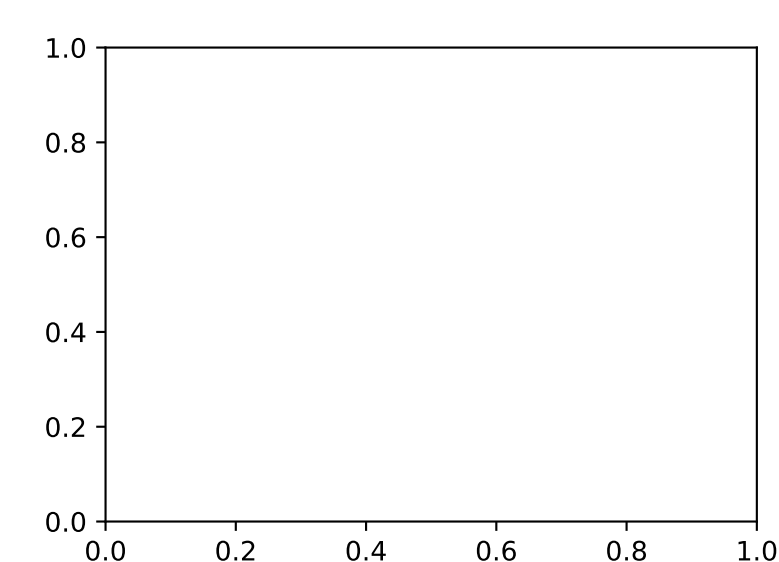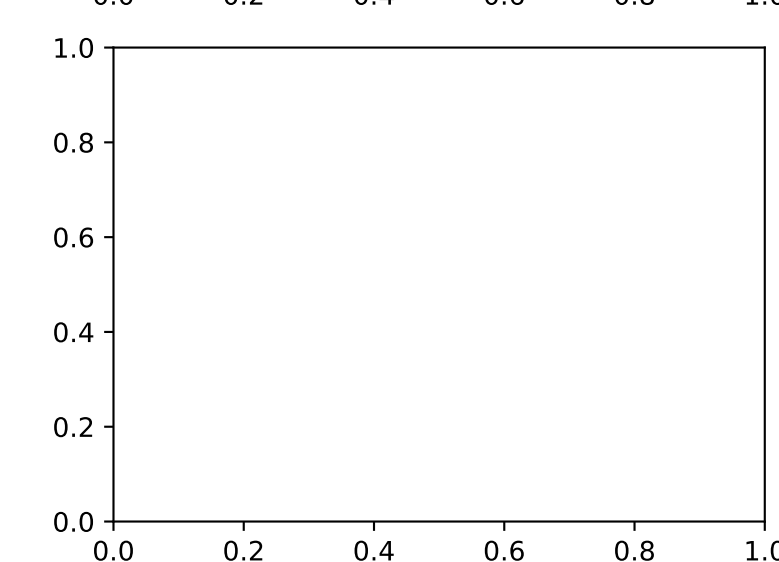

entries (ERA5-h): dist2coast

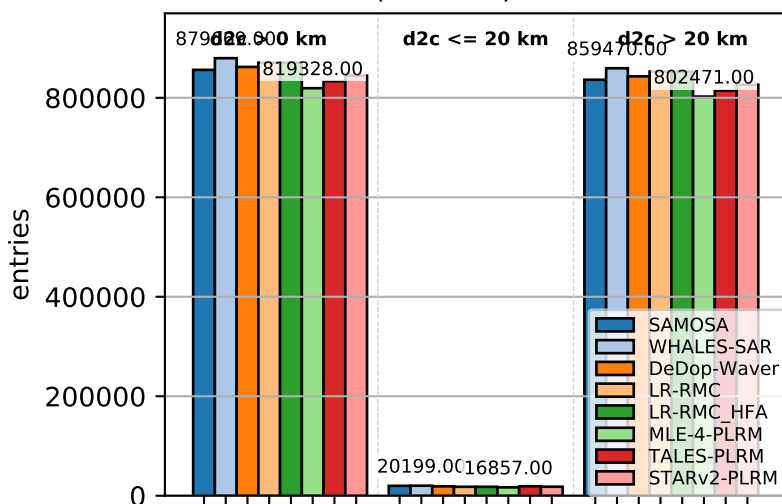

entries (ERA5-h): dist2coast

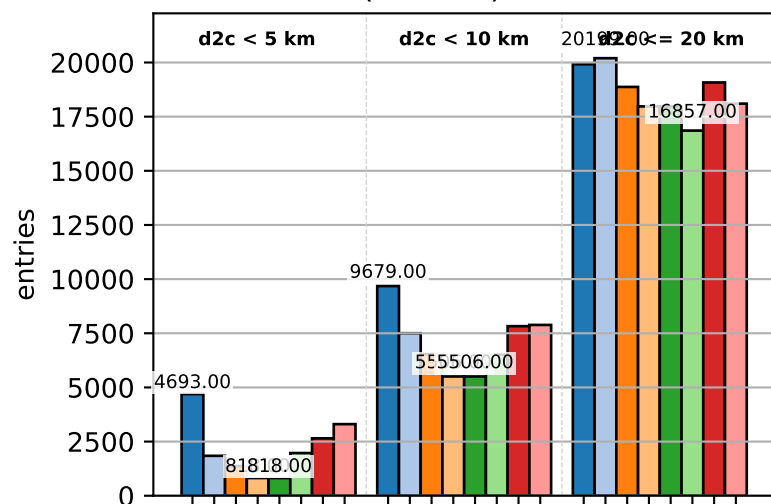

slope (ERA5-h): dist2coast

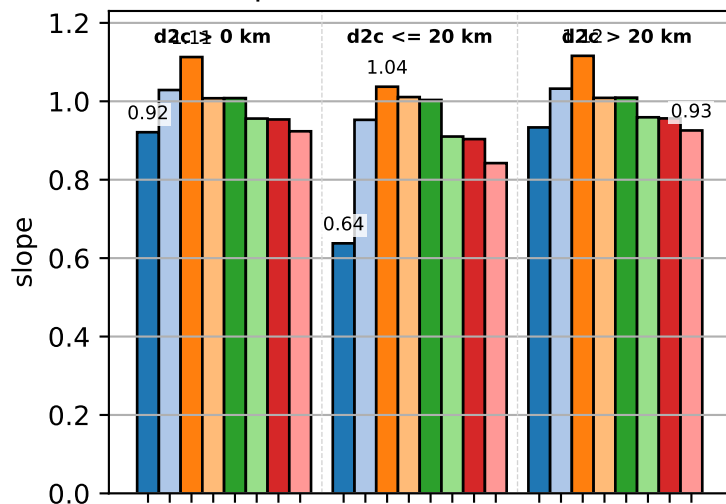

slope (ERA5-h): dist2coast

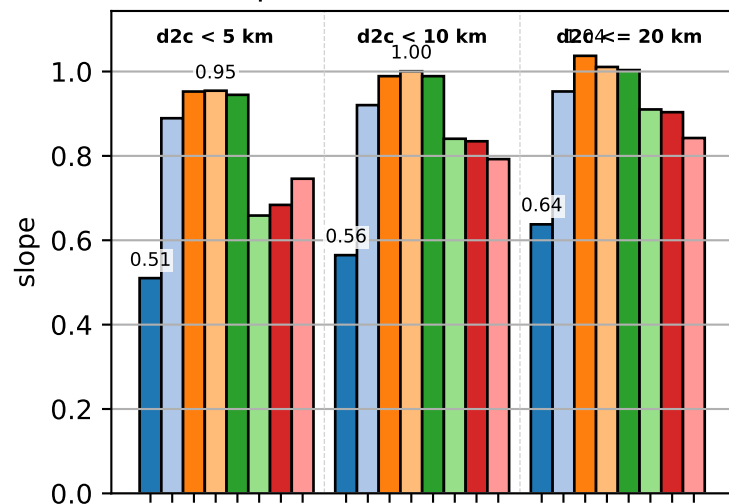

intercept (ERA5-h): dist2coast

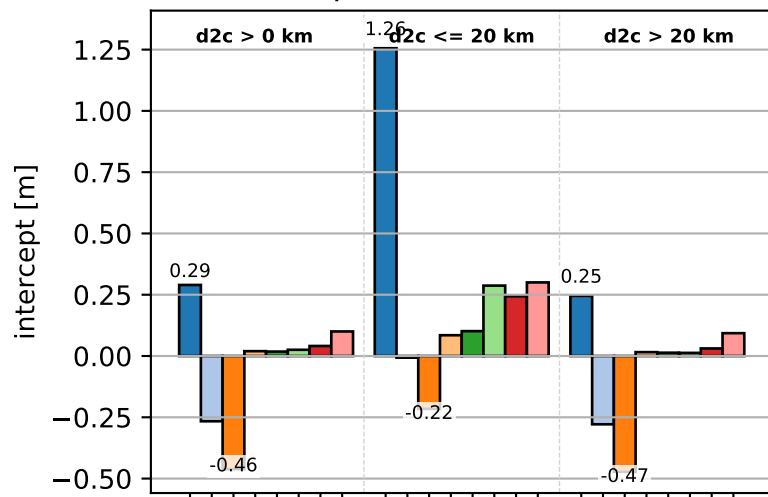

intercept (ERA5-h): dist2coast

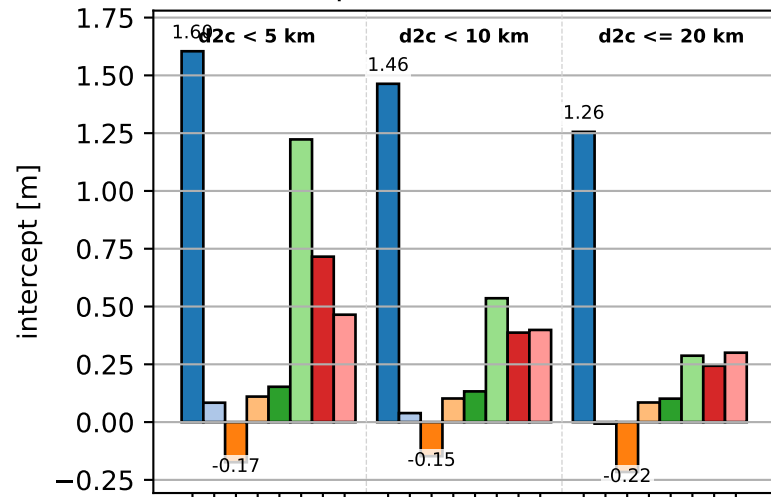

correlation (ERA5-h): dist2coast

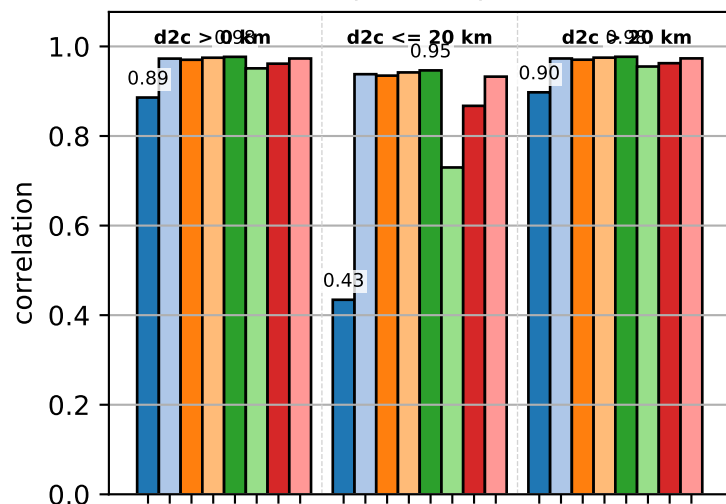

correlation (ERA5-h): dist2coast

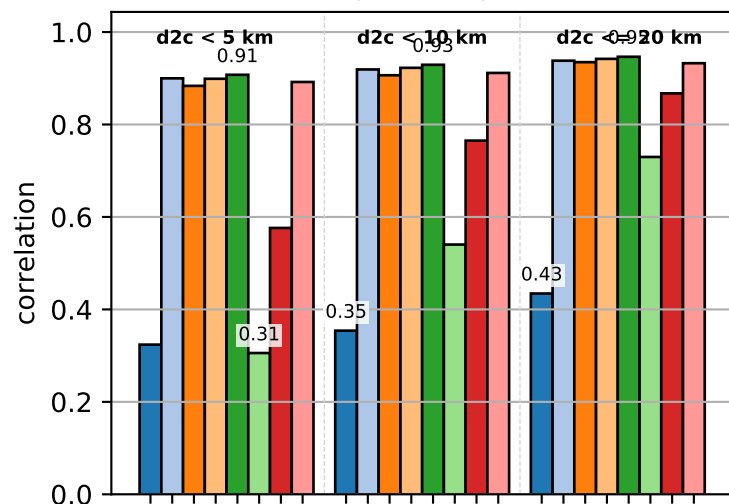

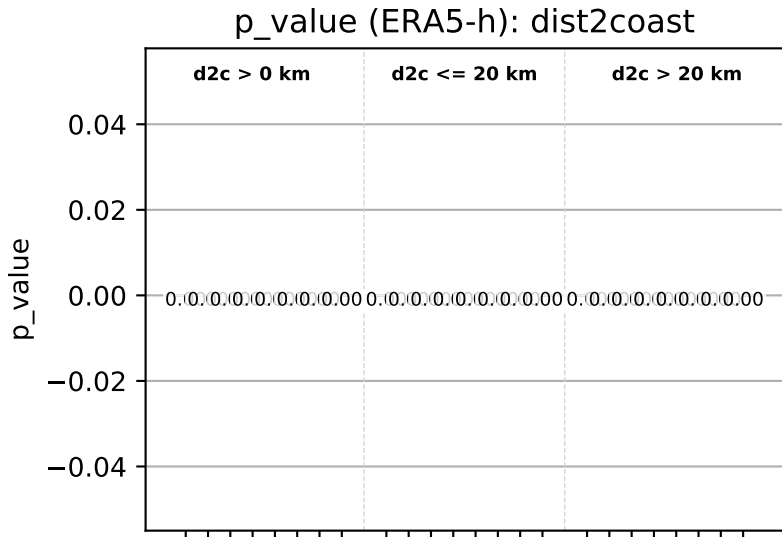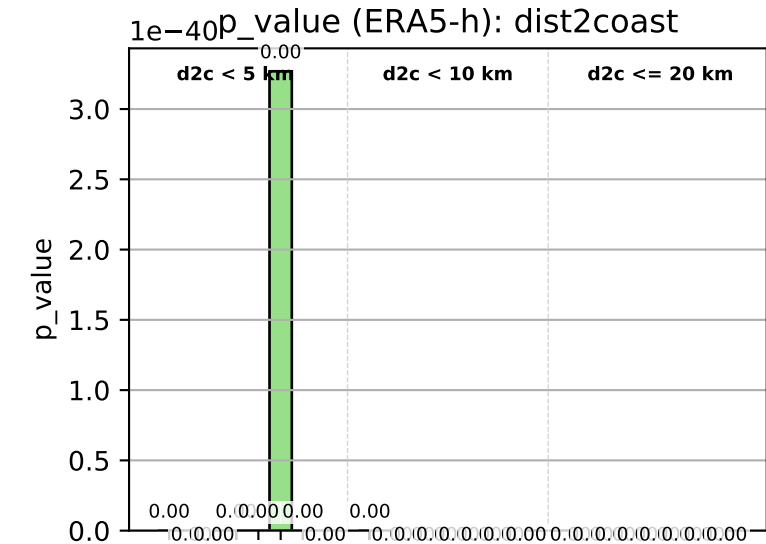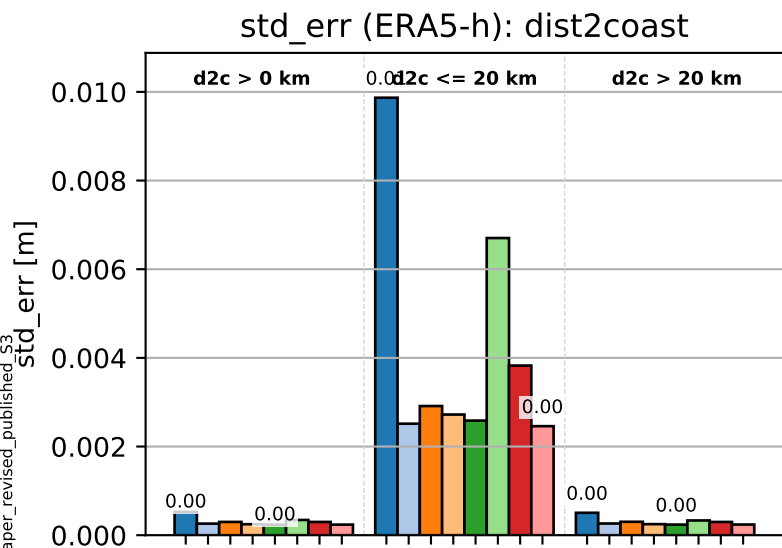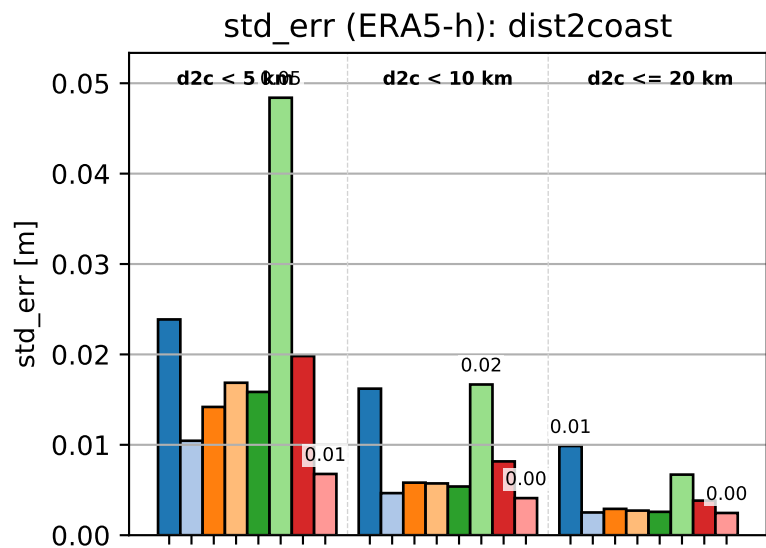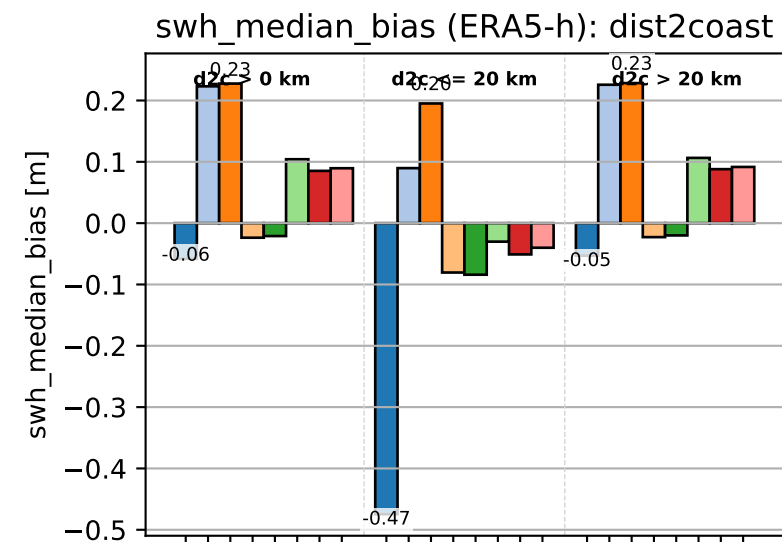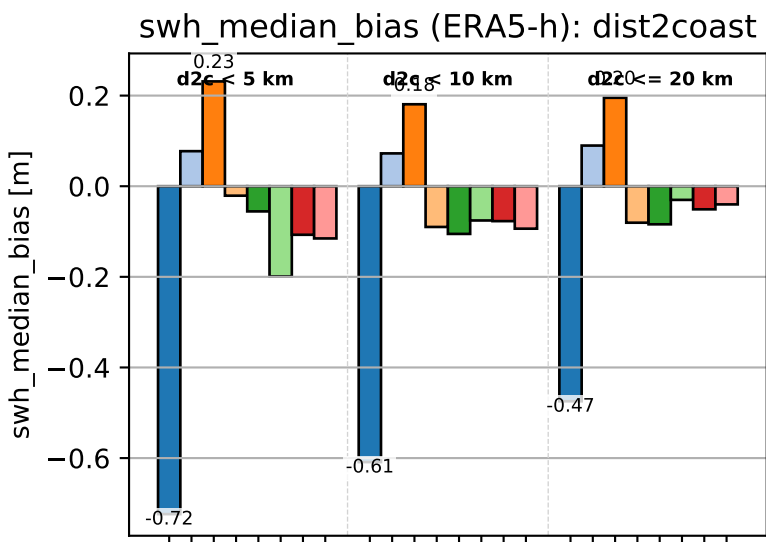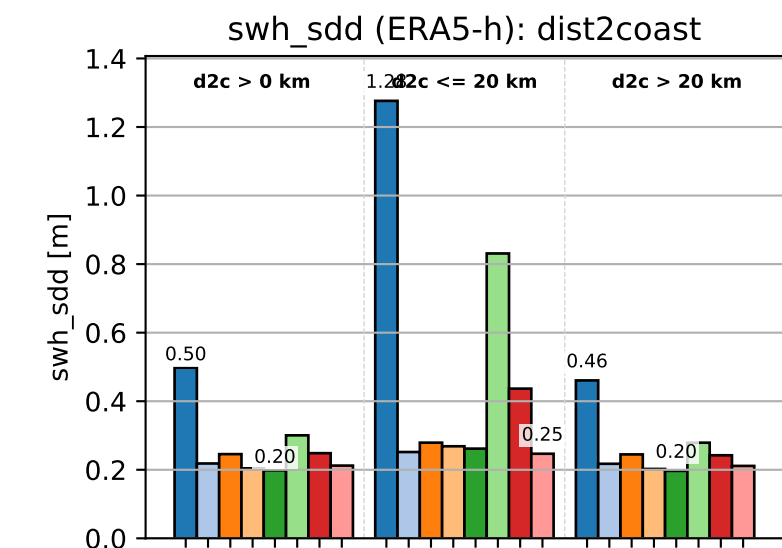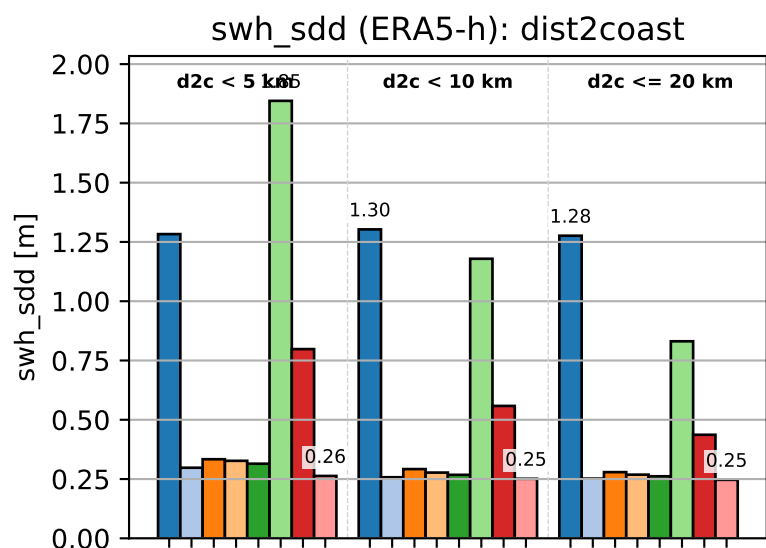

entries (ERA5-h): SWH

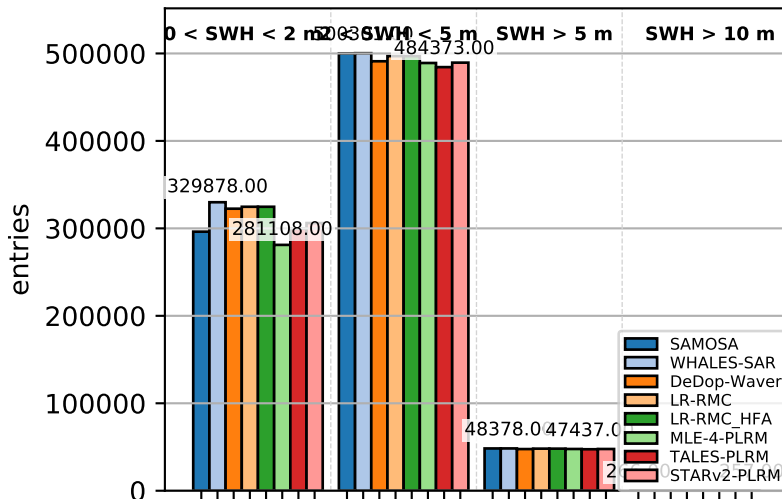

slope (ERA5-h): SWH

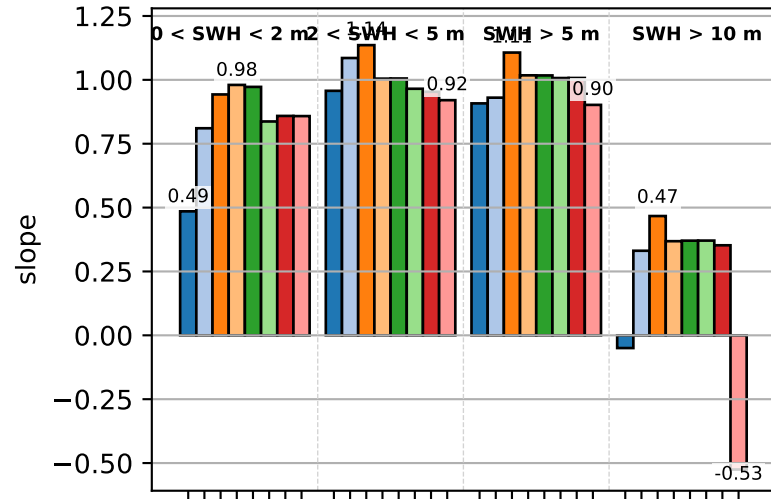

intercept (ERA5-h): SWH

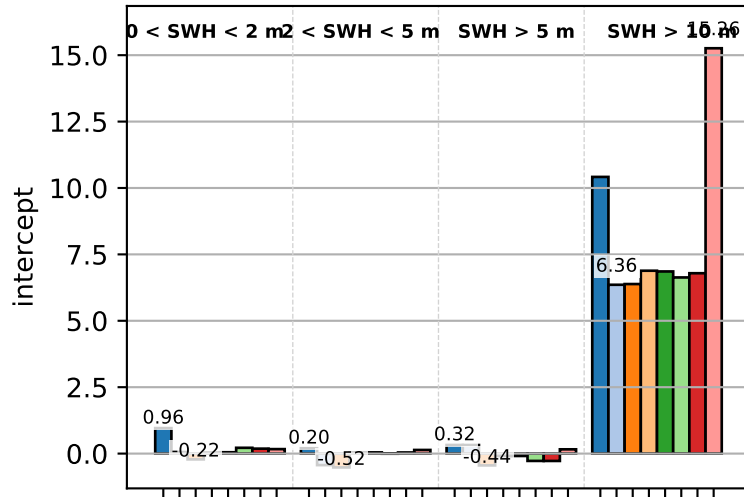

correlation (ERA5-h): SWH

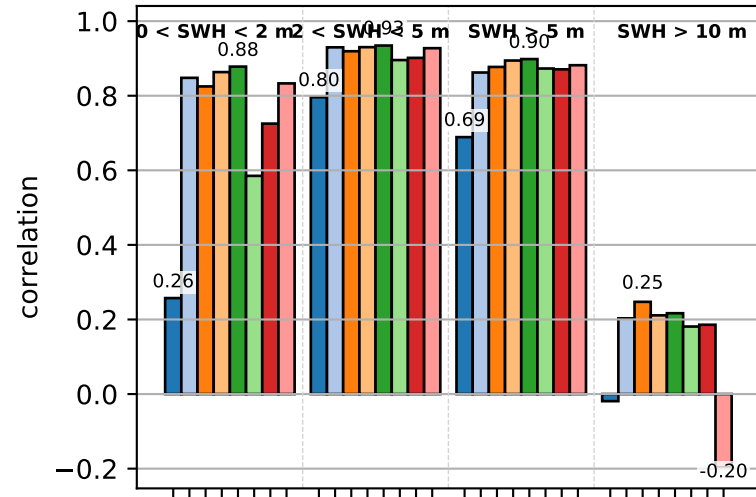

p\_value (ERA5-h): SWH

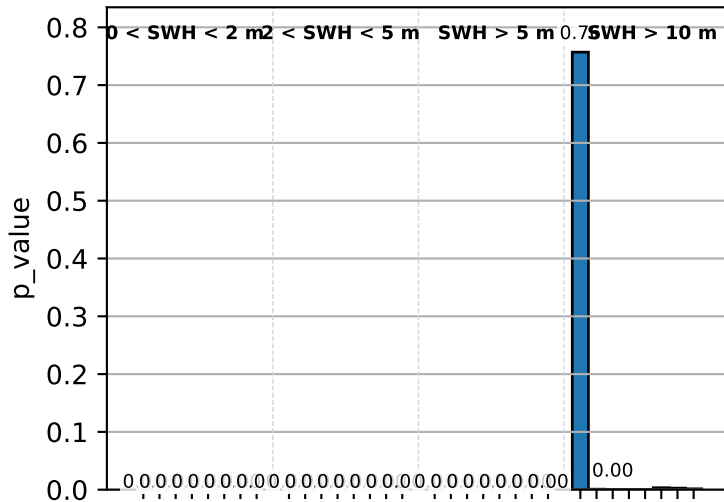

std\_err (ERA5-h): SWH

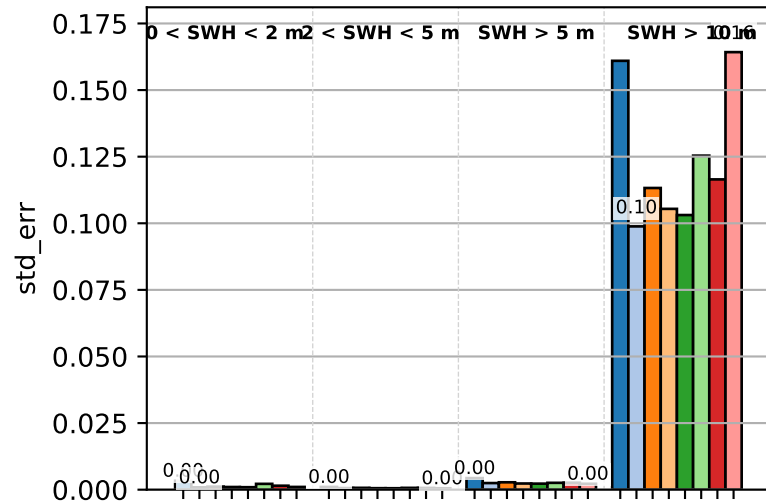

swh\_median\_bias (ERA5-h): SWH

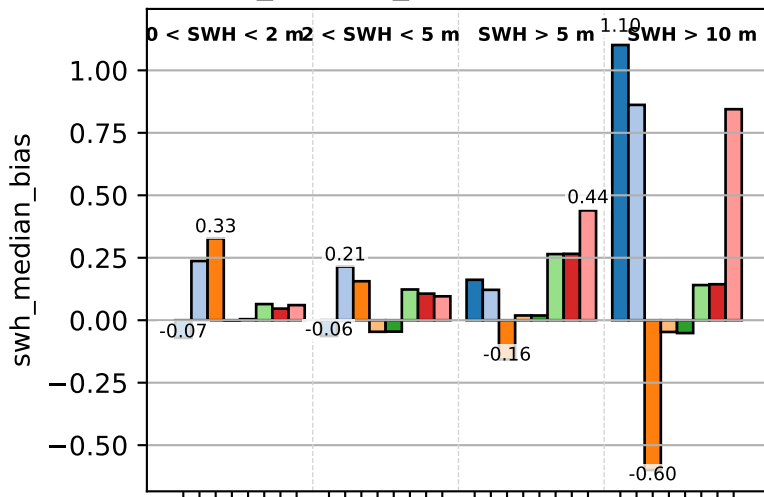

swh\_sdd (ERA5-h): SWH

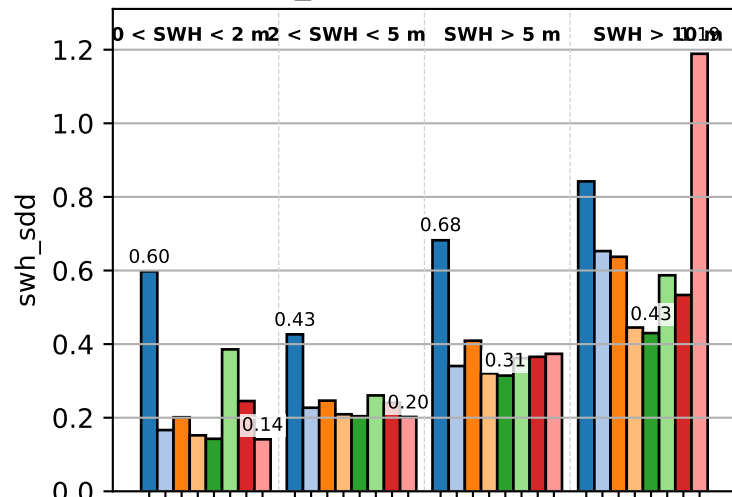



SAMOSA (s3) vs. ERA5-h: d2c &gt; 0 km

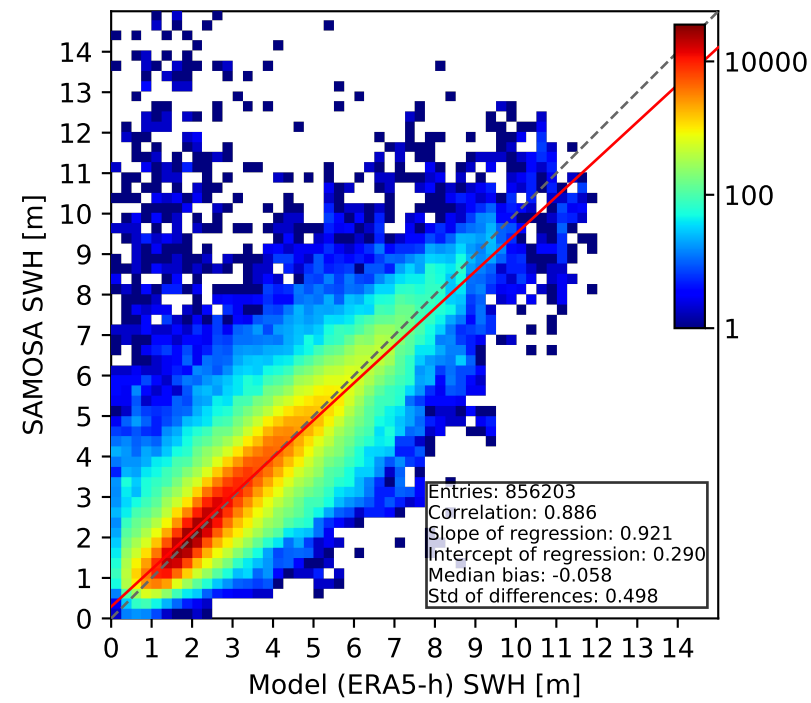

SAMOSA (s3) vs. ERA5-h: d2c &lt; 5 km

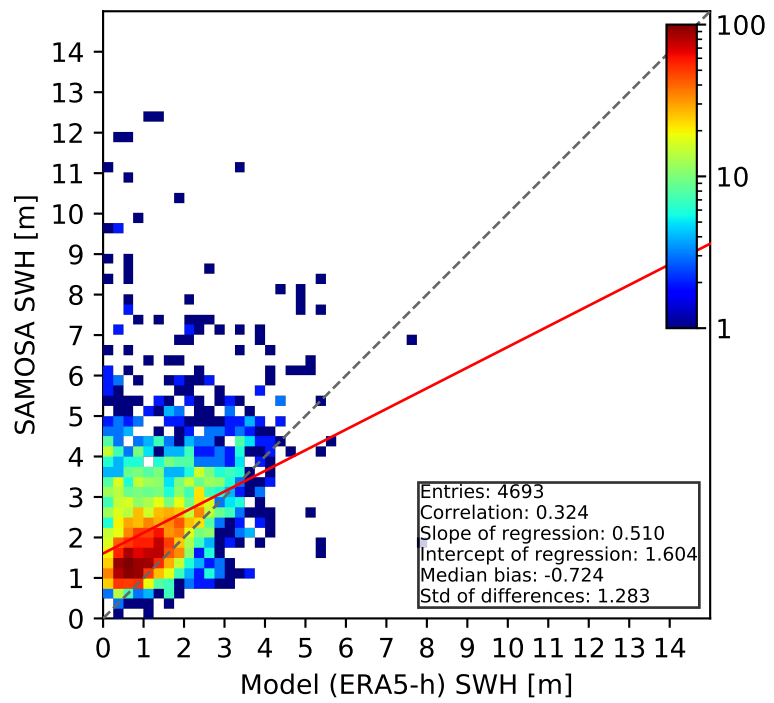

SAMOSA (s3) vs. ERA5-h: d2c &lt; 10 km

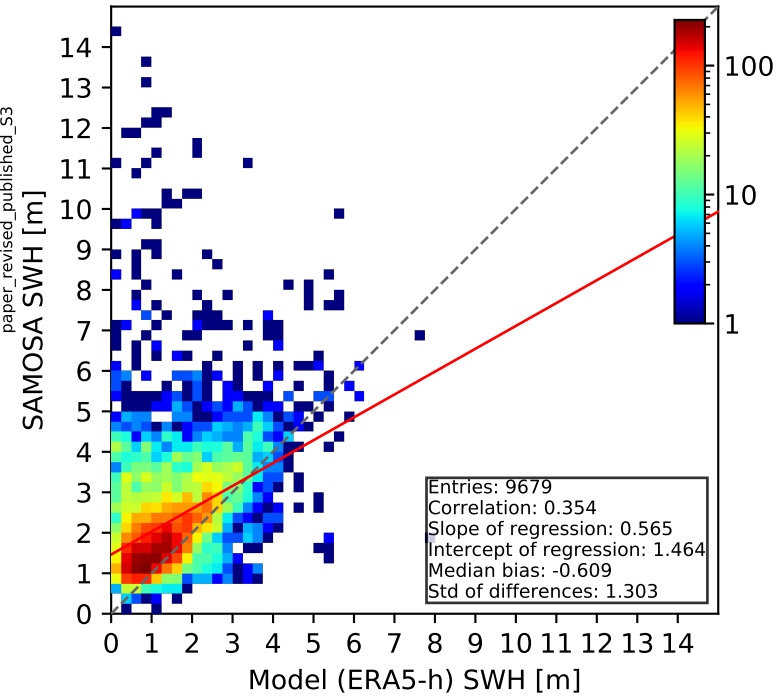

SAMOSA (s3) vs. ERA5-h: d2c &lt;= 20 km

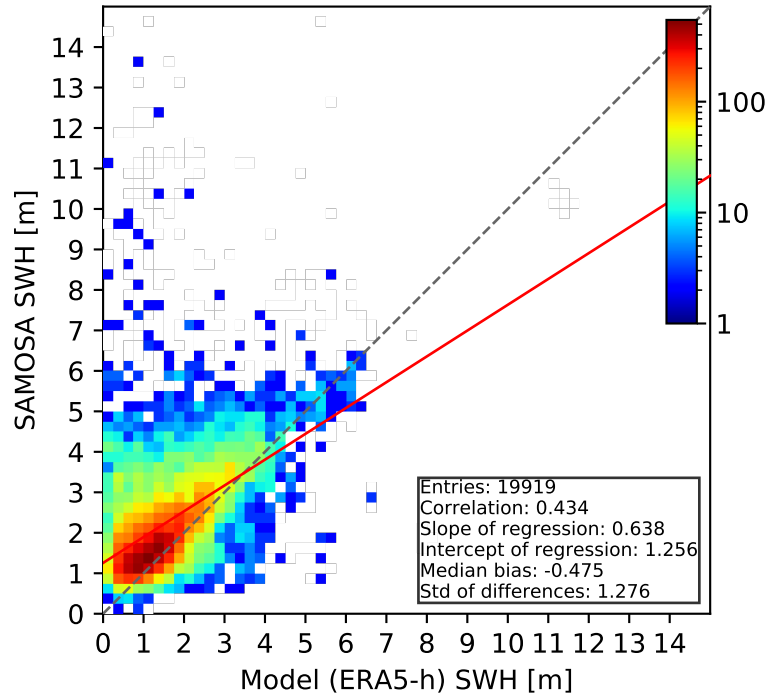

SAMOSA (s3) vs. ERA5-h: d2c &gt; 20 km

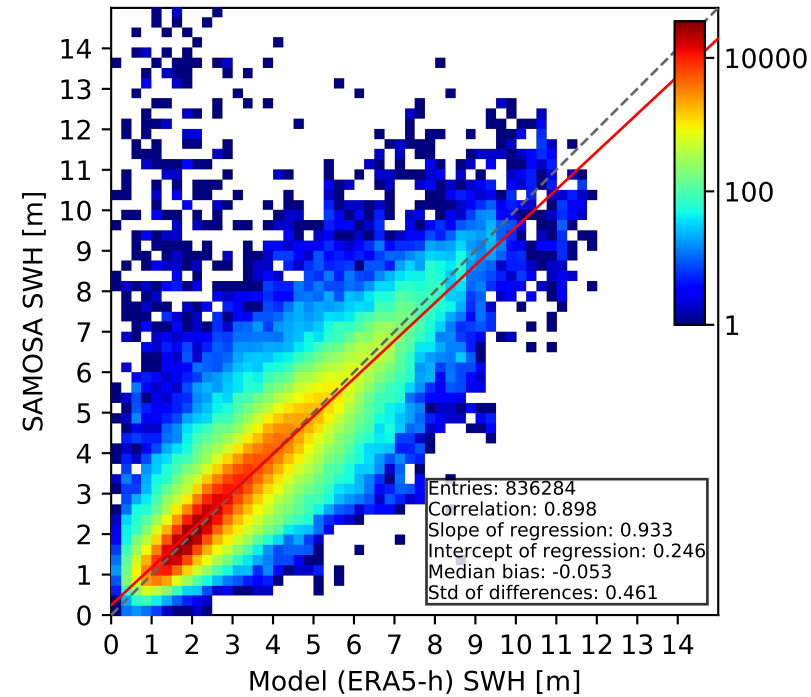

SAMOSA (s3) vs. ERA5-h: 0 &lt; SWH &lt; 2 m

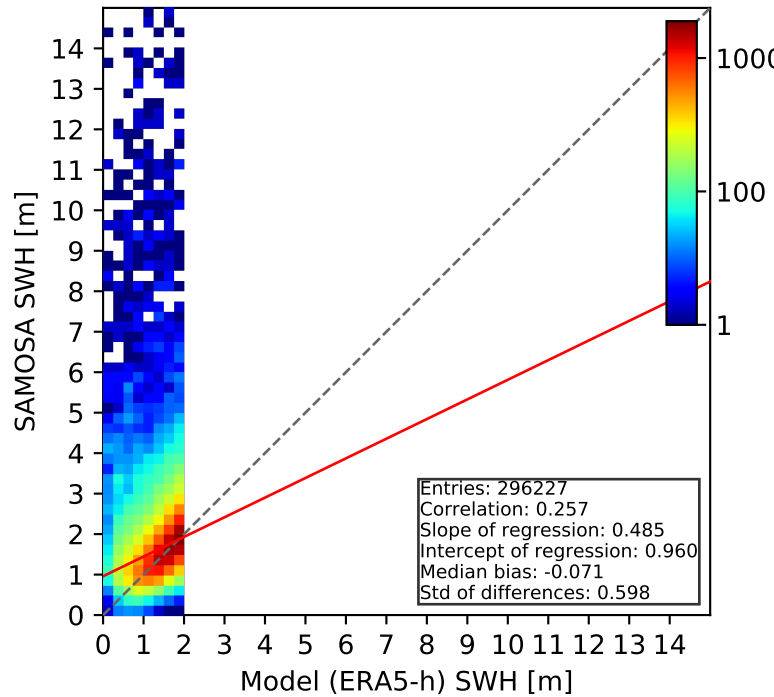

SAMOSA (s3) vs. ERA5-h:  $2 < \text{SWH} < 5 \text{ m}$

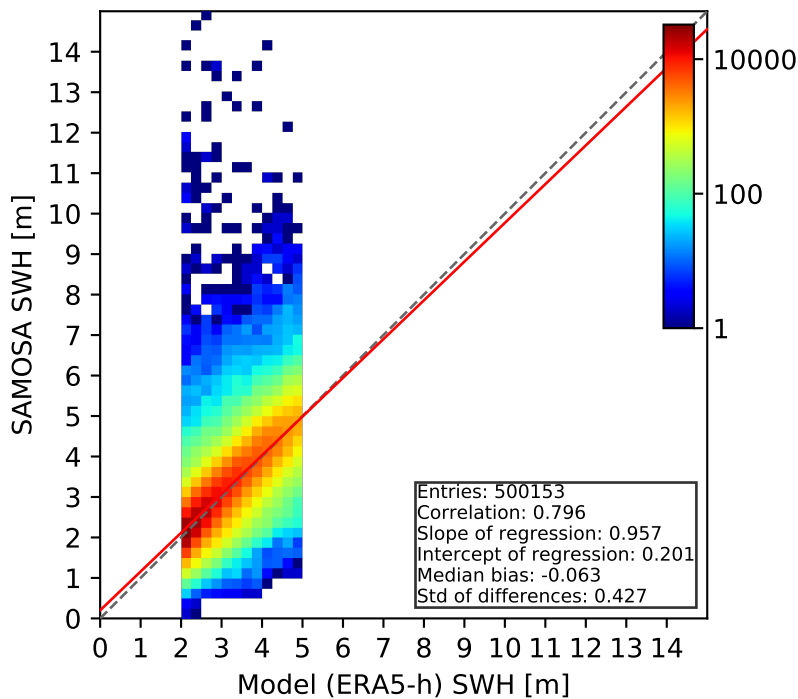

SAMOSA (s3) vs. ERA5-h:  $\text{SWH} > 5 \text{ m}$

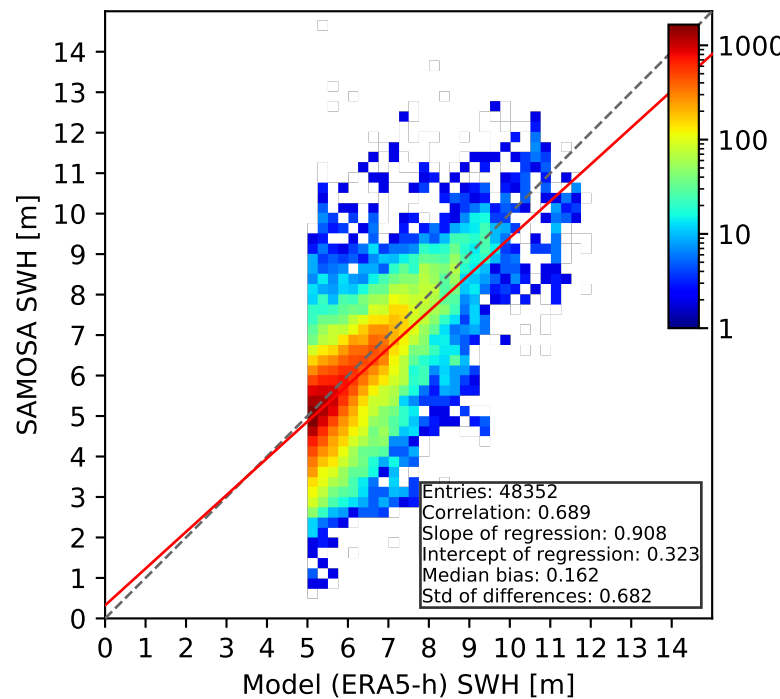

SAMOSA (s3) vs. ERA5-h:  $\text{SWH} > 10 \text{ m}$

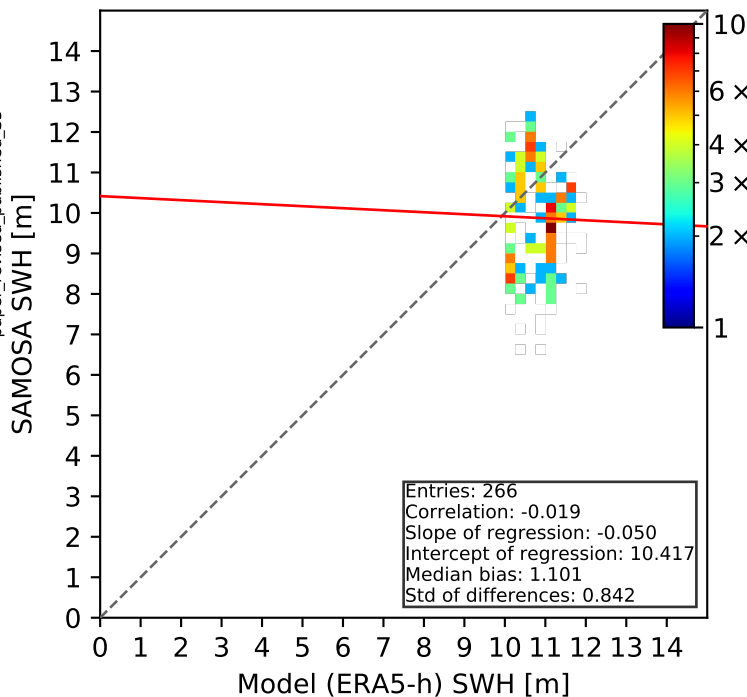

WHALES-SAR (s3) vs. ERA5-h:  $\text{d2c} > 0 \text{ km}$

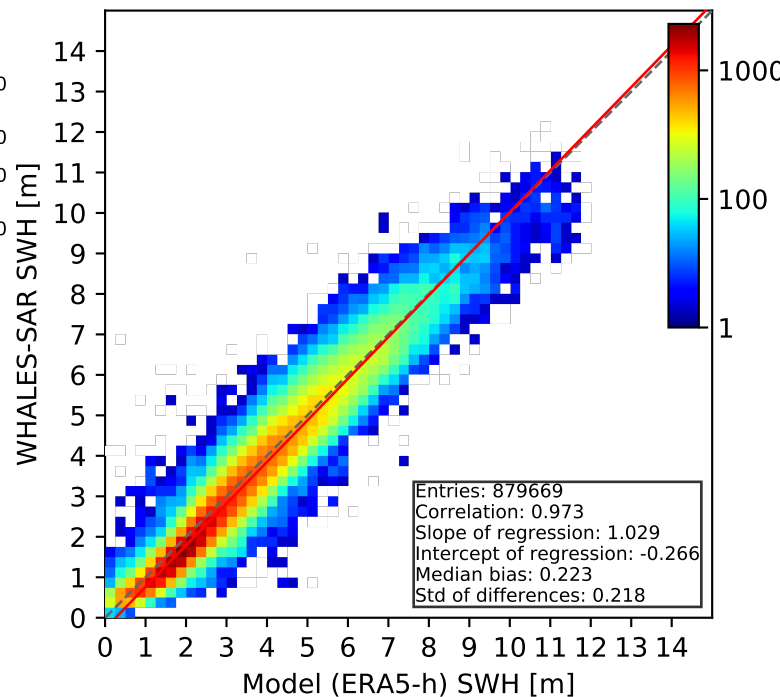

WHALES-SAR (s3) vs. ERA5-h:  $\text{d2c} < 5 \text{ km}$

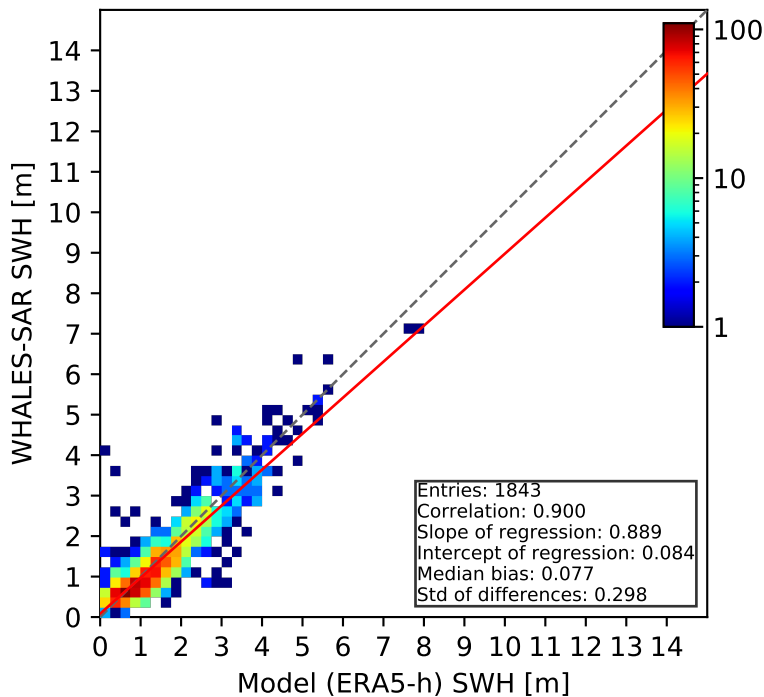

WHALES-SAR (s3) vs. ERA5-h:  $\text{d2c} < 10 \text{ km}$

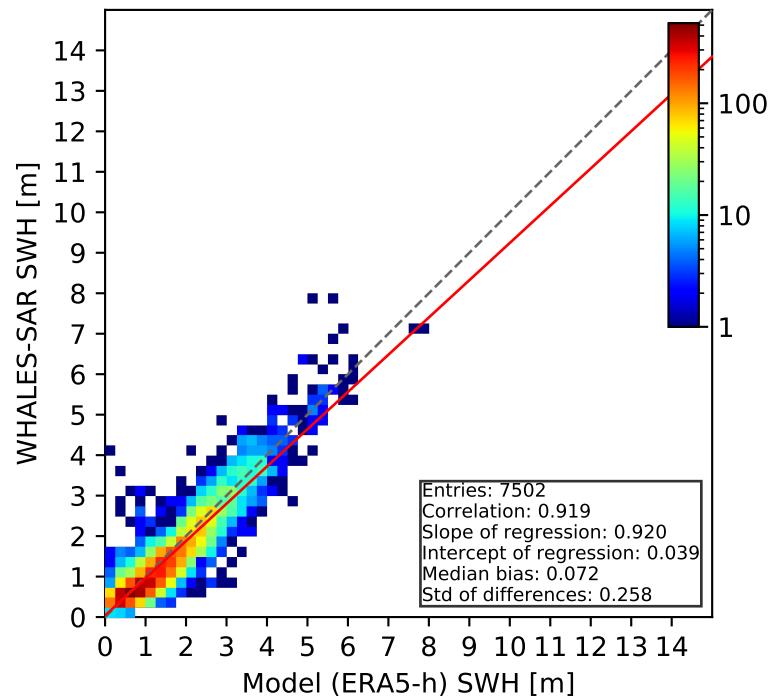

WHALES-SAR (s3) vs. ERA5-h: d2c <= 20 km

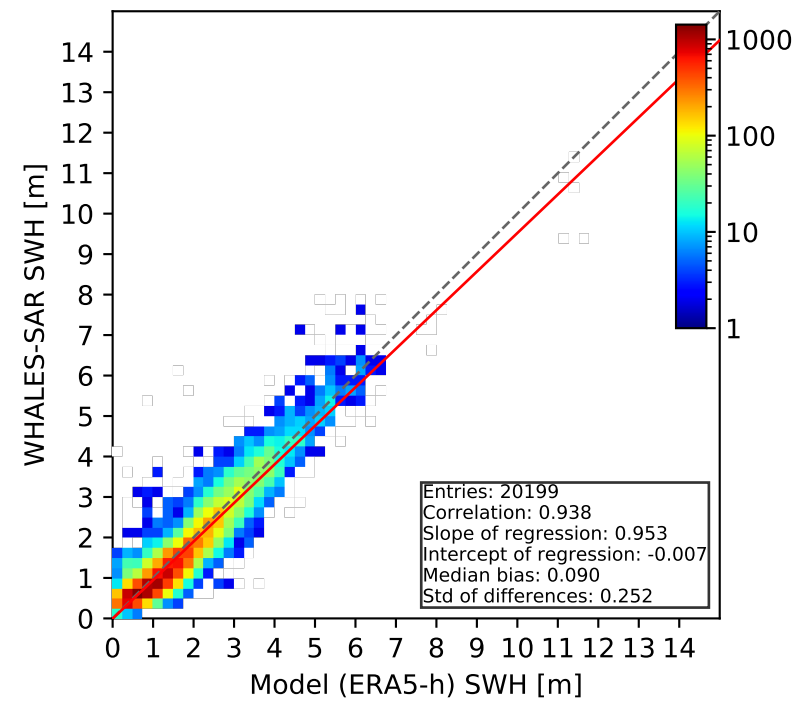

WHALES-SAR (s3) vs. ERA5-h: d2c > 20 km

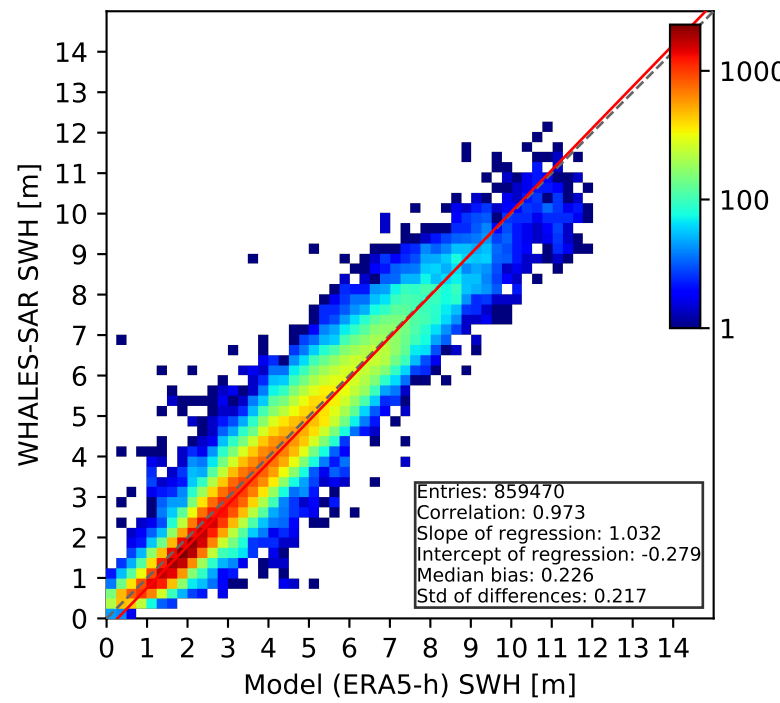

WHALES-SAR (s3) vs. ERA5-h: 0 < SWH < 2 m

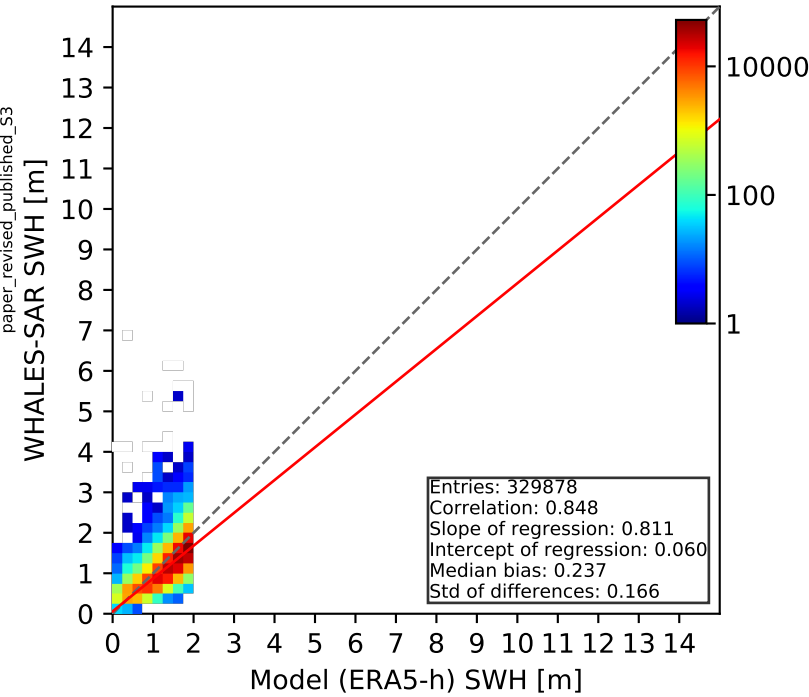

WHALES-SAR (s3) vs. ERA5-h: 2 < SWH < 5 m

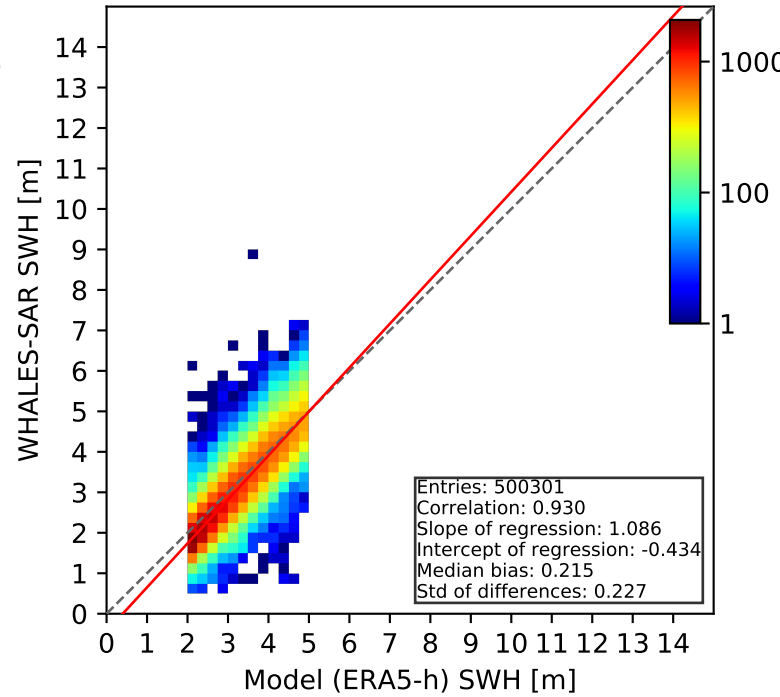

WHALES-SAR (s3) vs. ERA5-h: SWH > 5 m

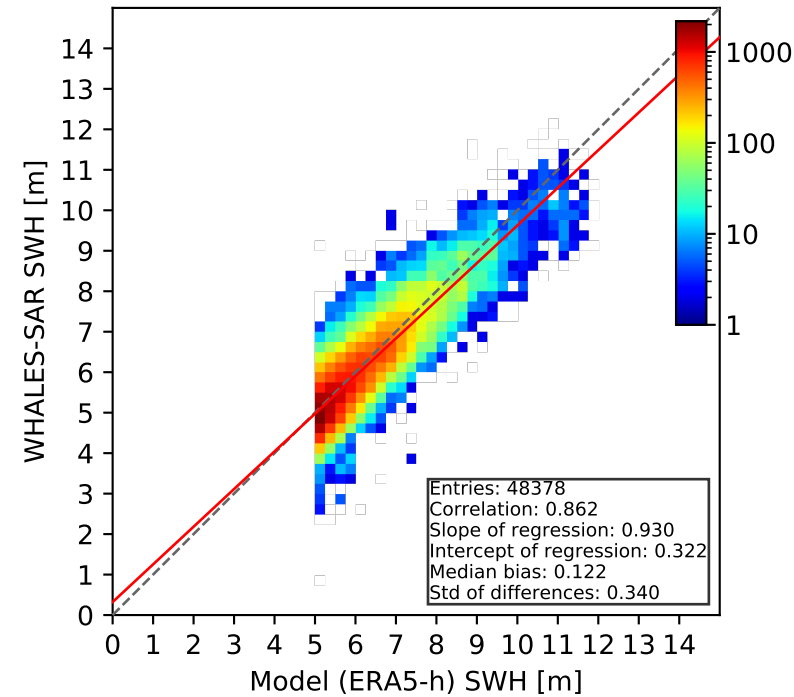

WHALES-SAR (s3) vs. ERA5-h: SWH > 10 m

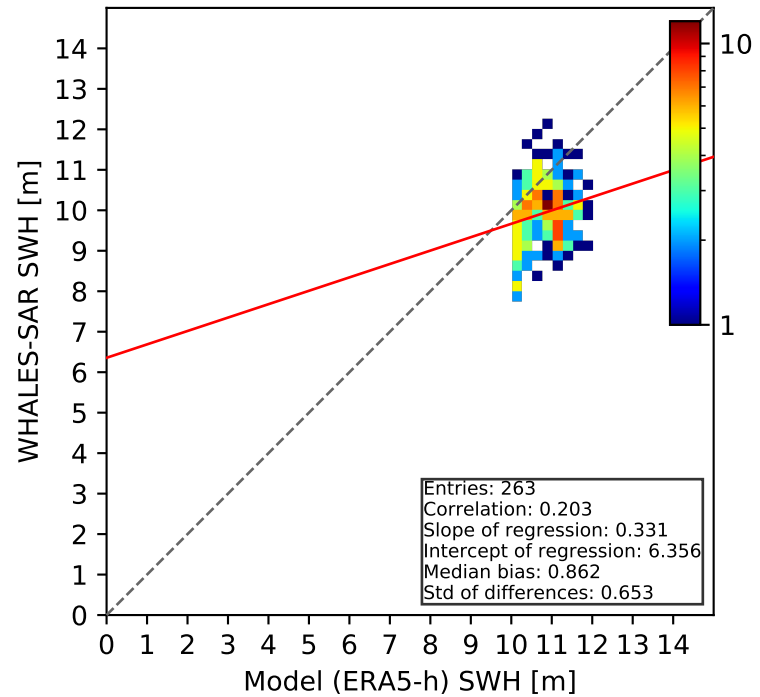

DeDop-Waver (s3) vs. ERA5-h: d2c > 0 km

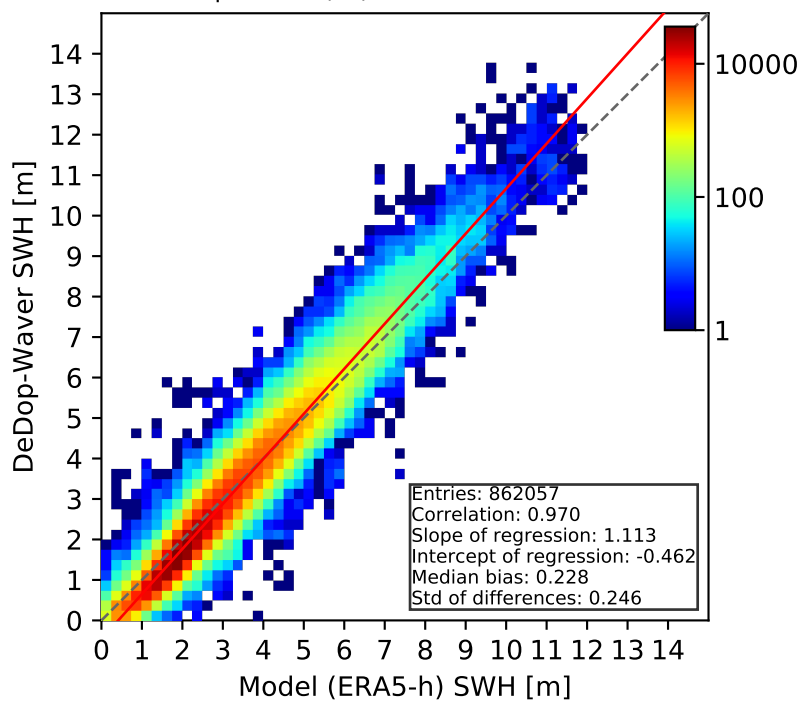

DeDop-Waver (s3) vs. ERA5-h: d2c < 5 km

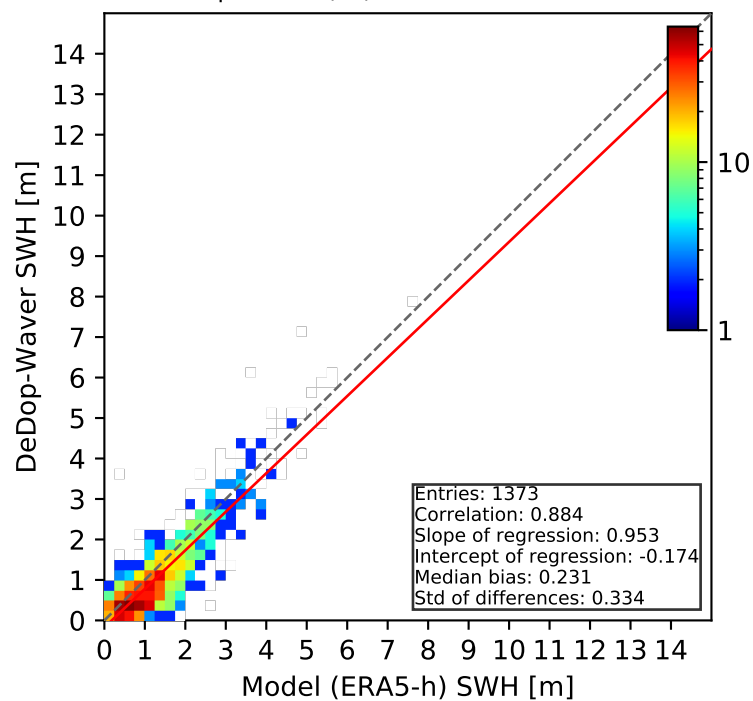

DeDop-Waver (s3) vs. ERA5-h: d2c < 10 km

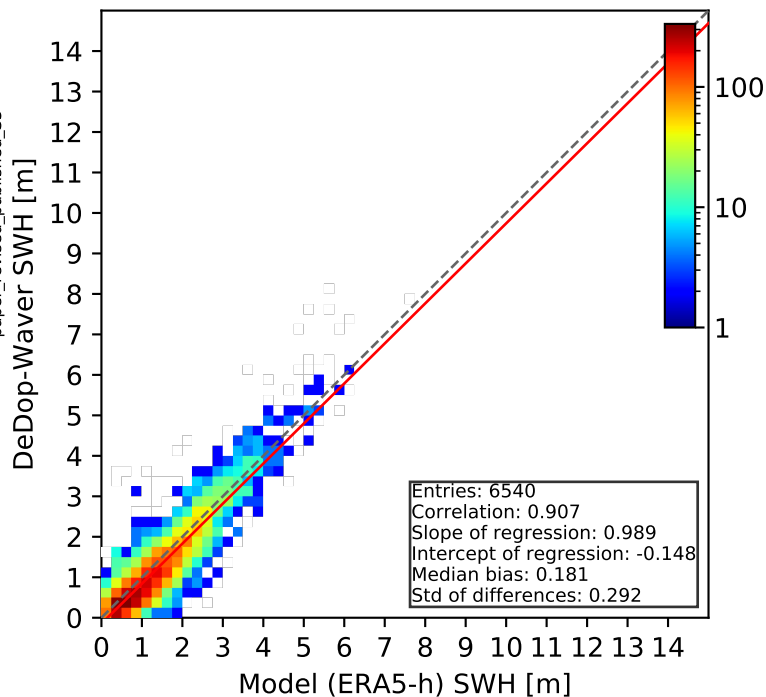

DeDop-Waver (s3) vs. ERA5-h: d2c <= 20 km

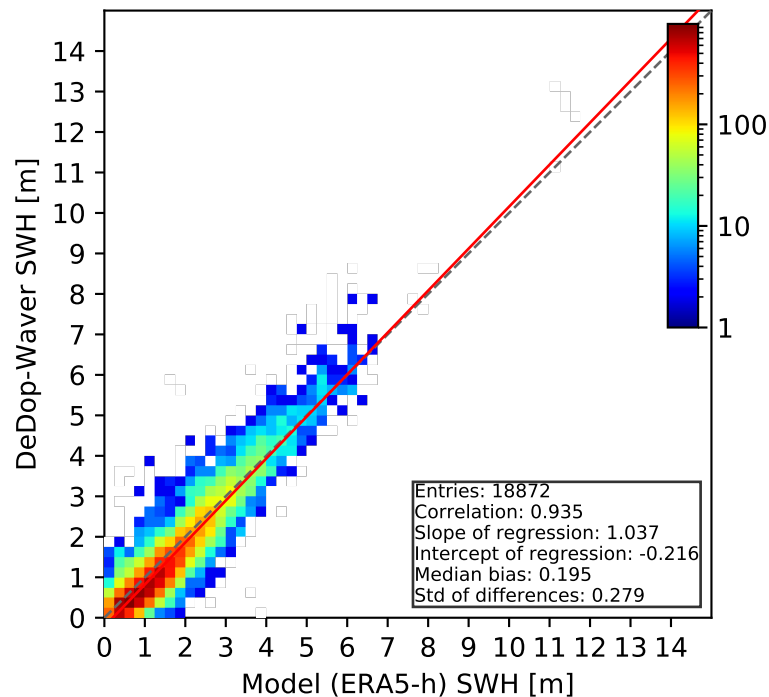

DeDop-Waver (s3) vs. ERA5-h: d2c > 20 km

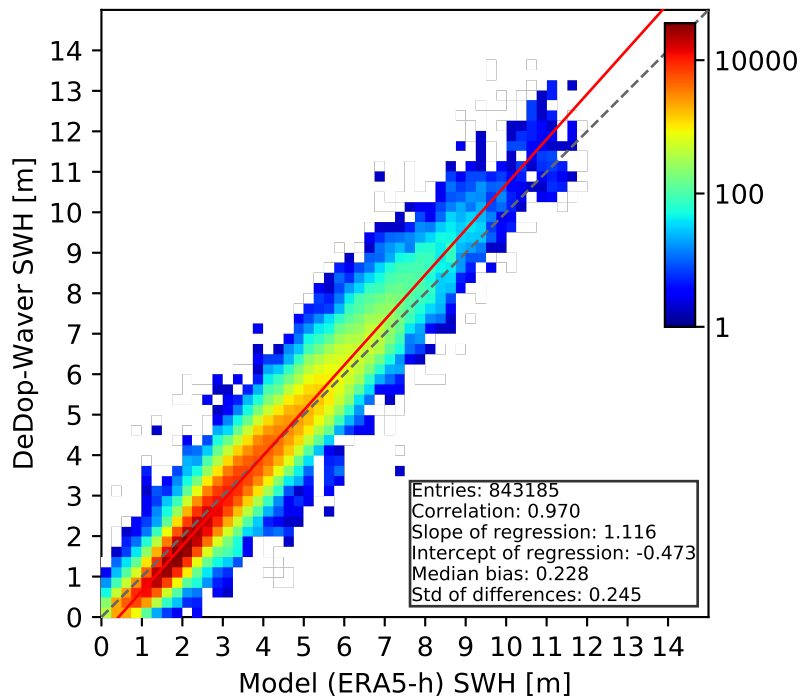

DeDop-Waver (s3) vs. ERA5-h: 0 < SWH < 2 m

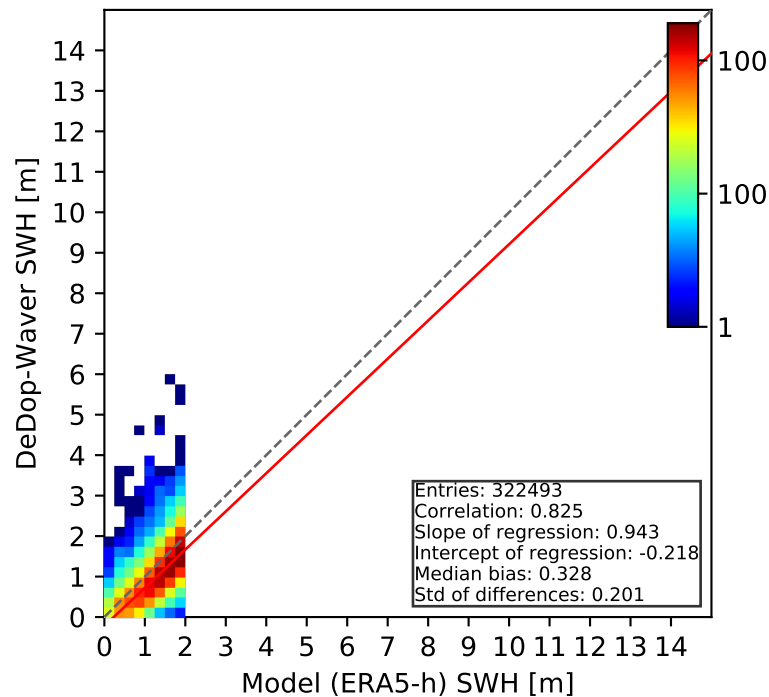

DeDop-Waver (s3) vs. ERA5-h:  $2 < \text{SWH} < 5 \text{ m}$

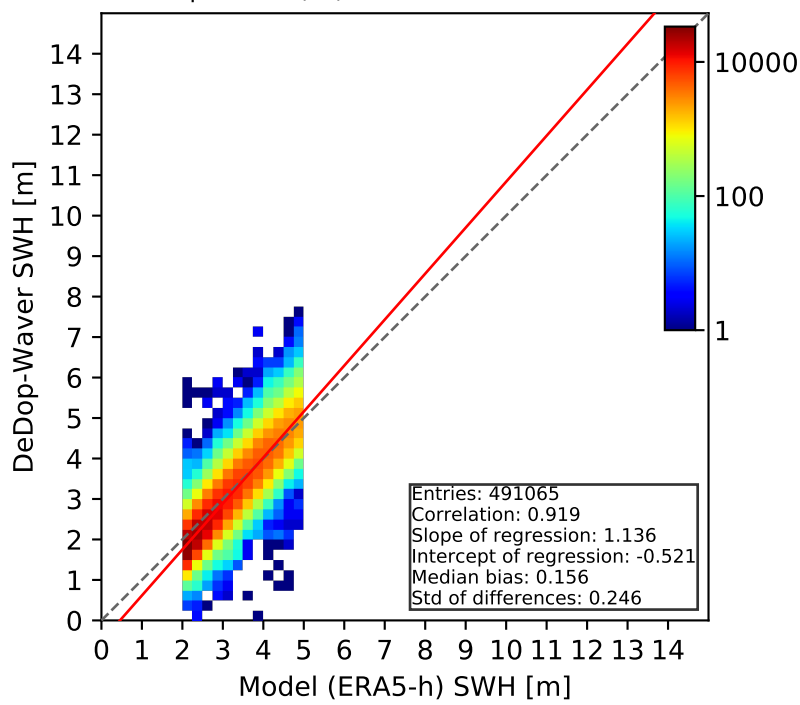

DeDop-Waver (s3) vs. ERA5-h:  $\text{SWH} > 5 \text{ m}$

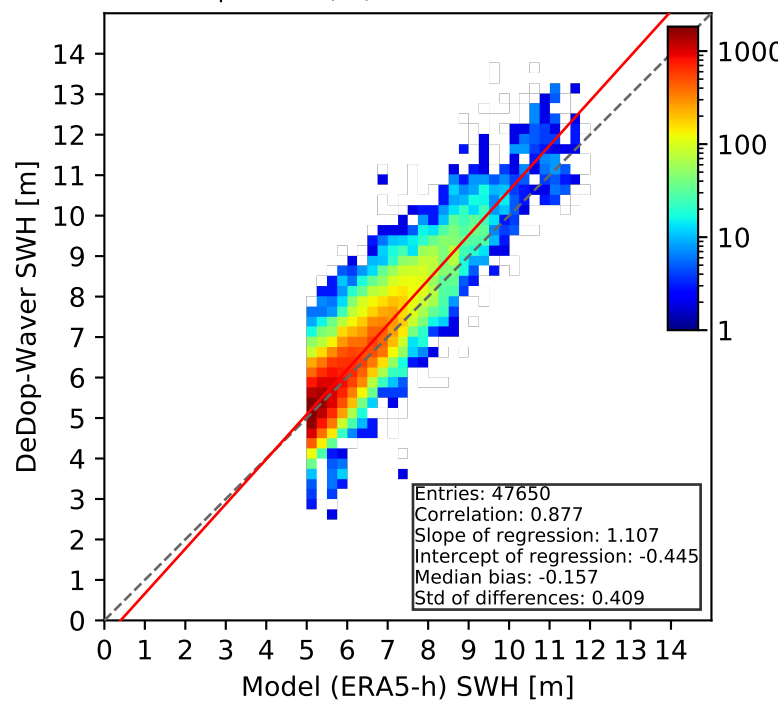

DeDop-Waver (s3) vs. ERA5-h:  $\text{SWH} > 10 \text{ m}$

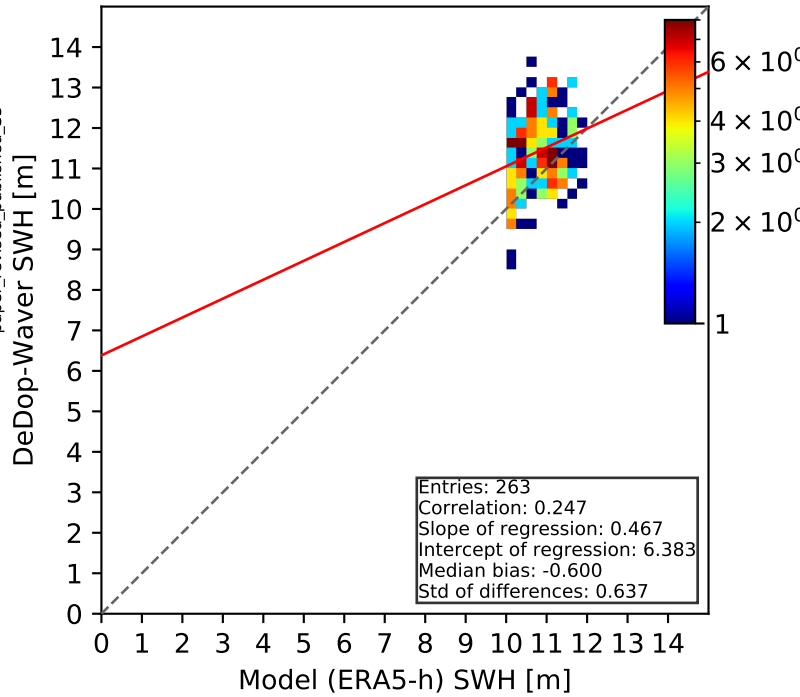

LR-RMC (s3) vs. ERA5-h:  $\text{d2c} > 0 \text{ km}$

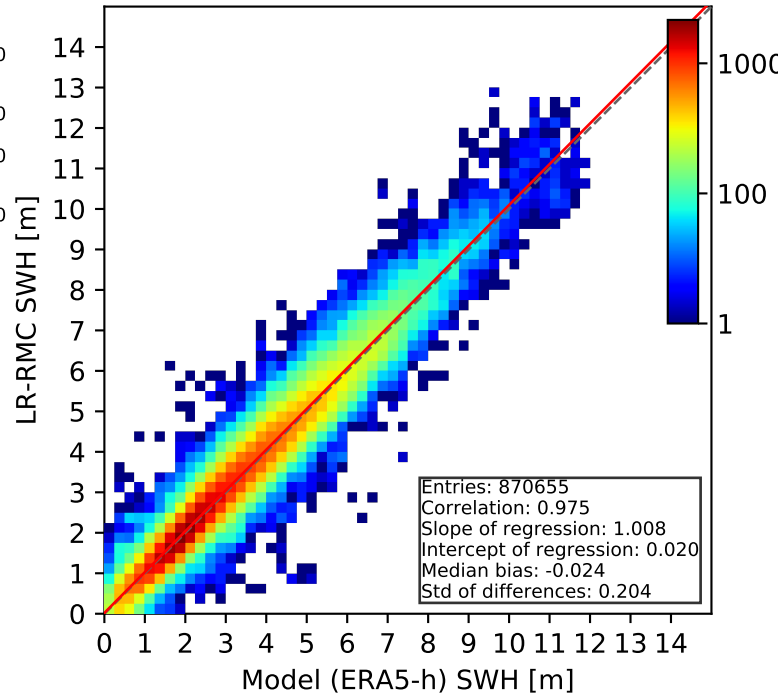

LR-RMC (s3) vs. ERA5-h:  $\text{d2c} < 5 \text{ km}$

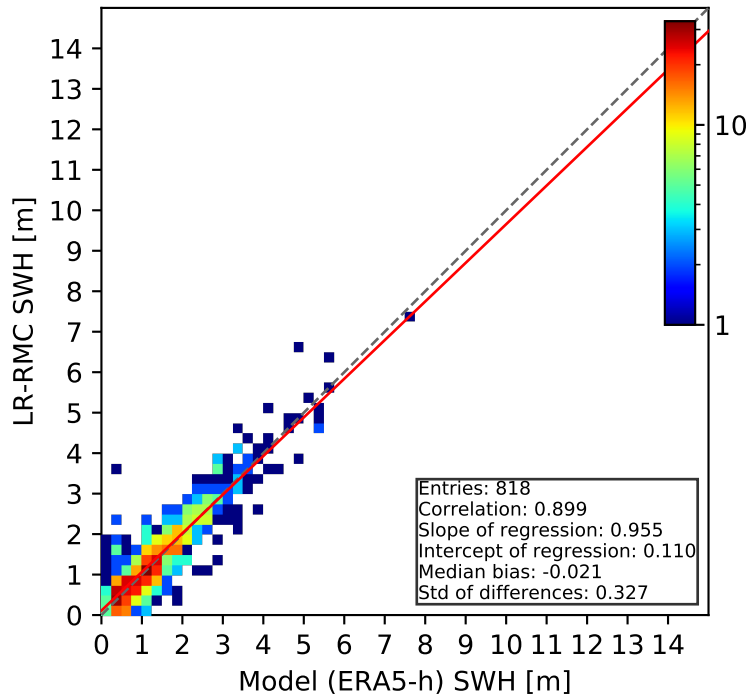

LR-RMC (s3) vs. ERA5-h:  $\text{d2c} < 10 \text{ km}$

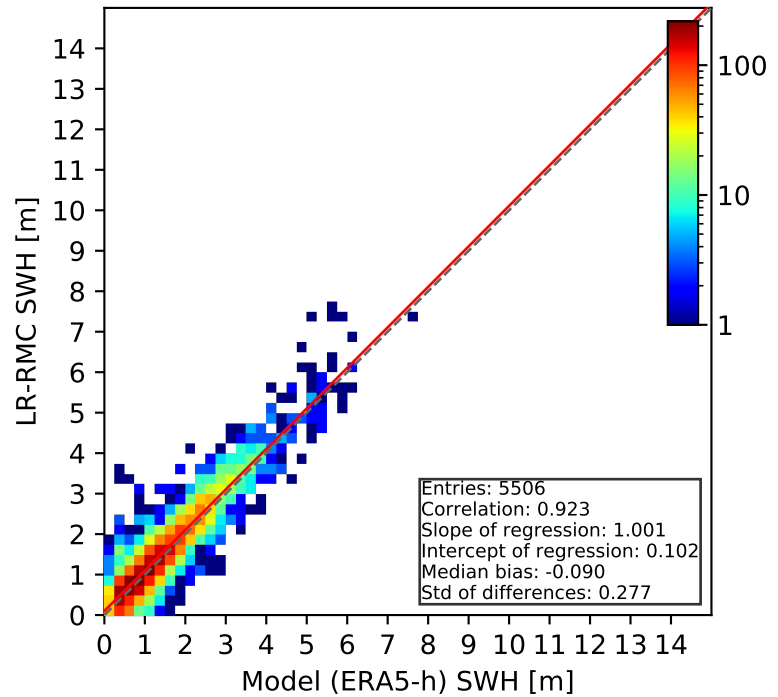

LR-RMC (s3) vs. ERA5-h: d2c &lt;= 20 km

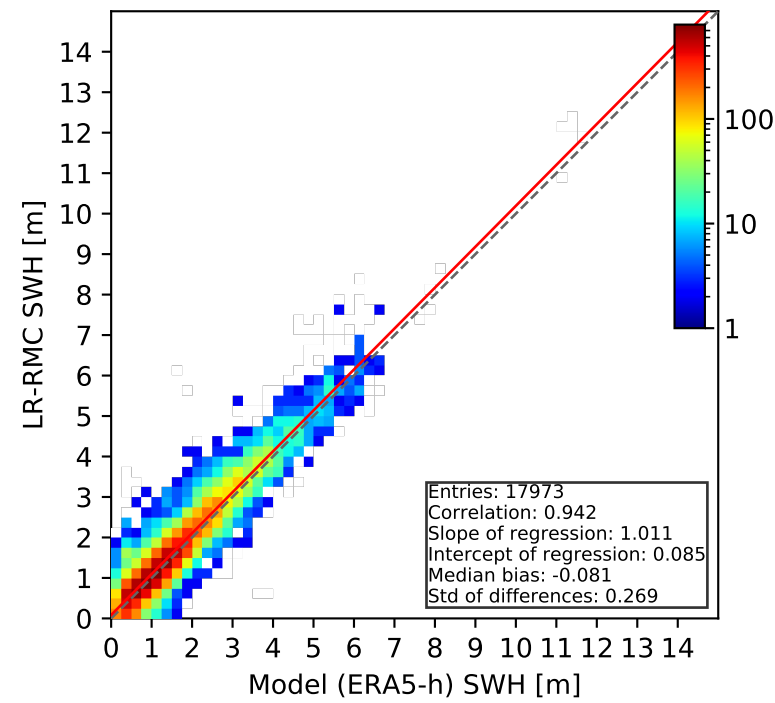

LR-RMC (s3) vs. ERA5-h: d2c &gt; 20 km

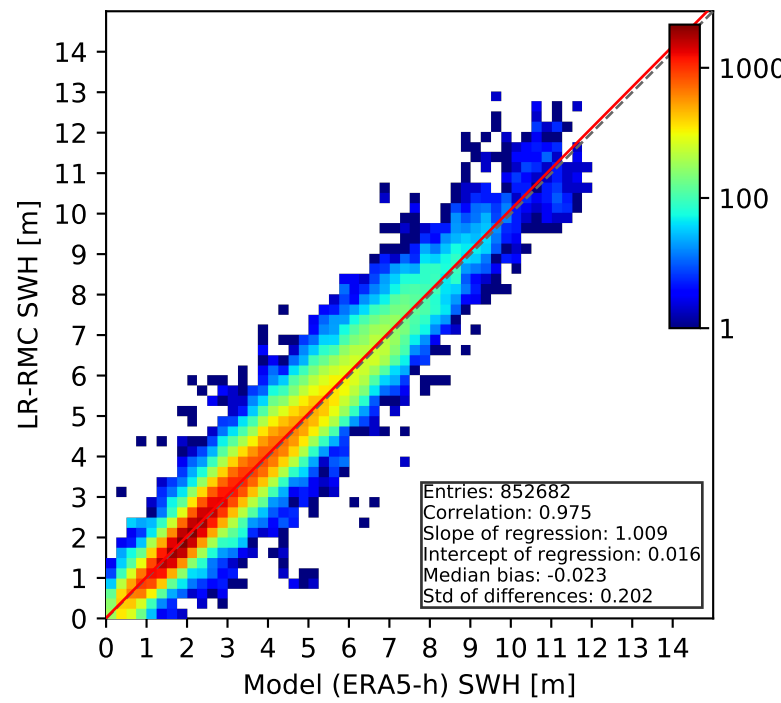

LR-RMC (s3) vs. ERA5-h: 0 &lt; SWH &lt; 2 m

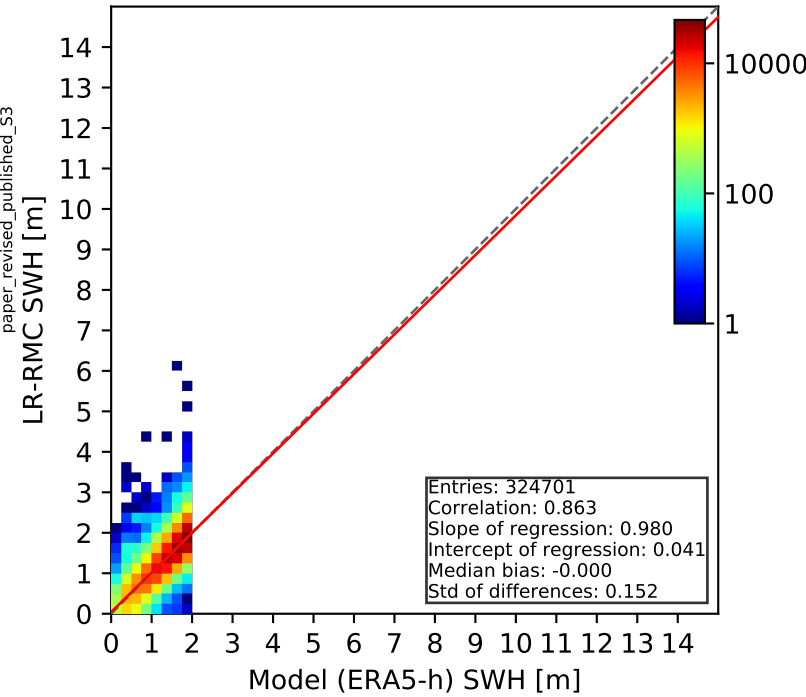

LR-RMC (s3) vs. ERA5-h: 2 &lt; SWH &lt; 5 m

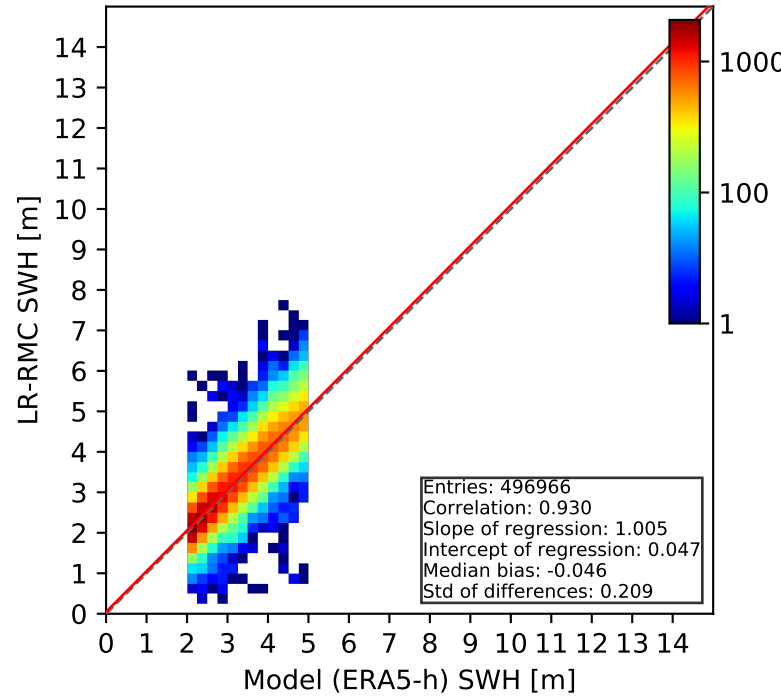

LR-RMC (s3) vs. ERA5-h: SWH &gt; 5 m

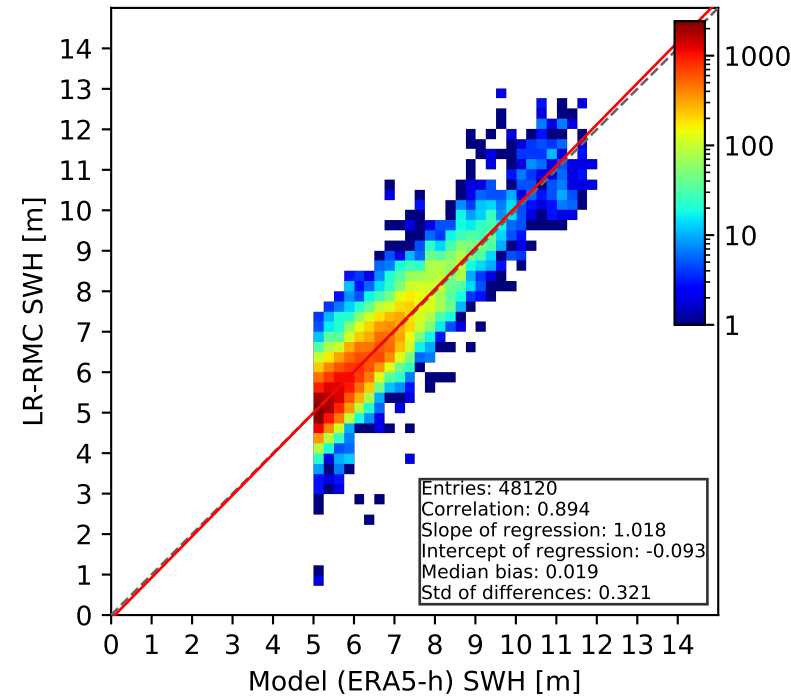

LR-RMC (s3) vs. ERA5-h: SWH &gt; 10 m

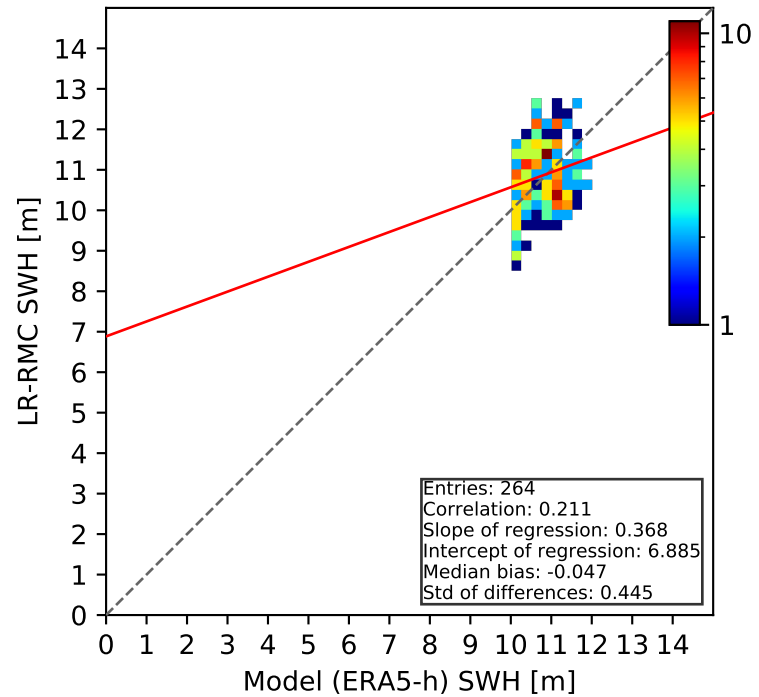

LR-RMC\_HFA (s3) vs. ERA5-h: d2c > 0 km

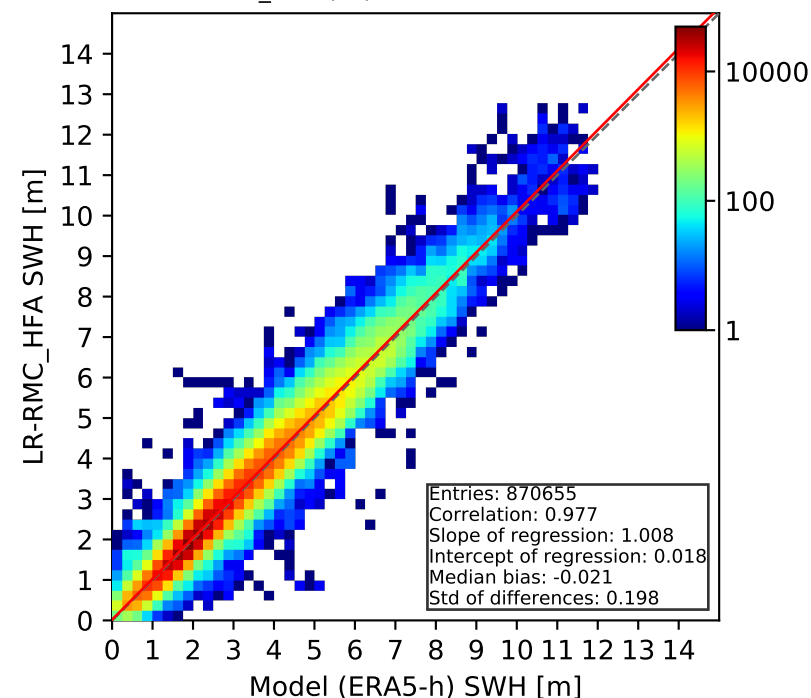

LR-RMC\_HFA (s3) vs. ERA5-h: d2c < 5 km

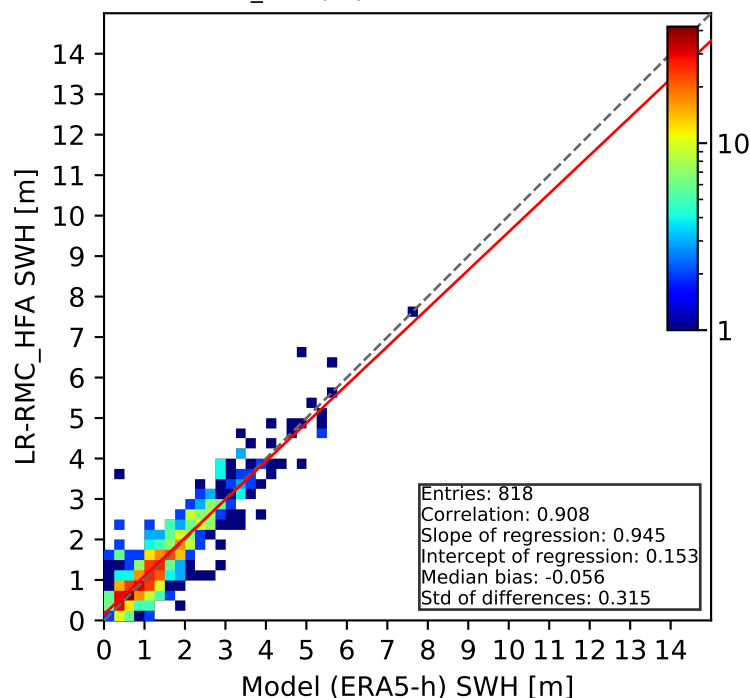

LR-RMC\_HFA (s3) vs. ERA5-h: d2c < 10 km

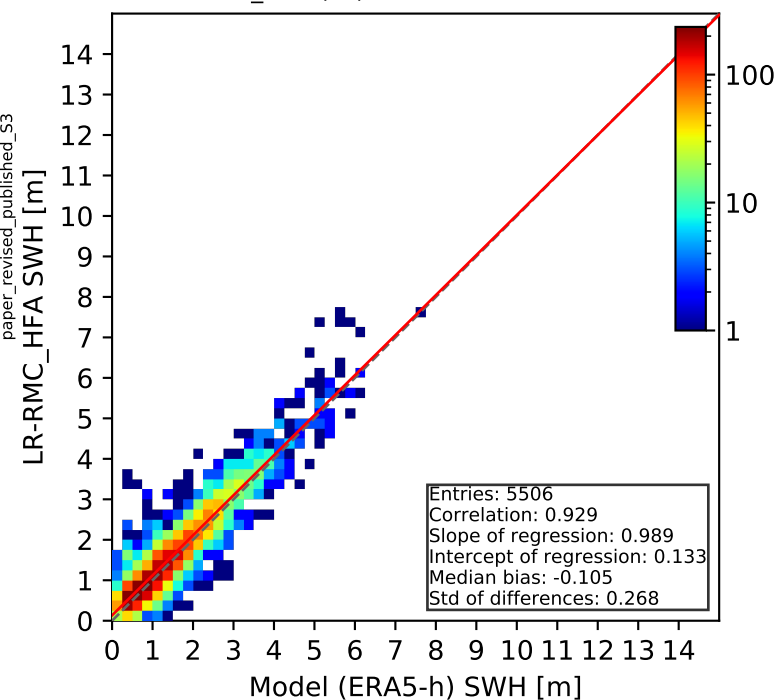

LR-RMC\_HFA (s3) vs. ERA5-h: d2c <= 20 km

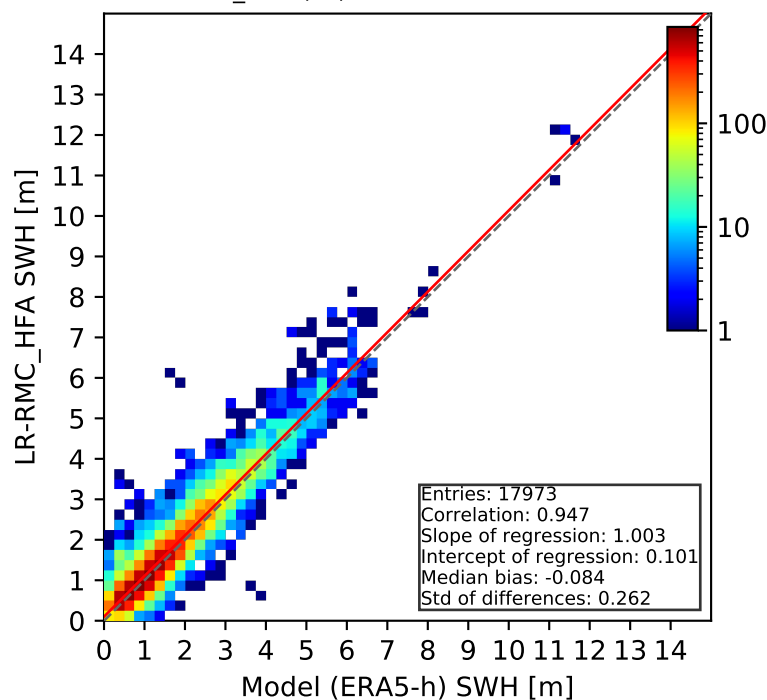

LR-RMC\_HFA (s3) vs. ERA5-h: d2c > 20 km

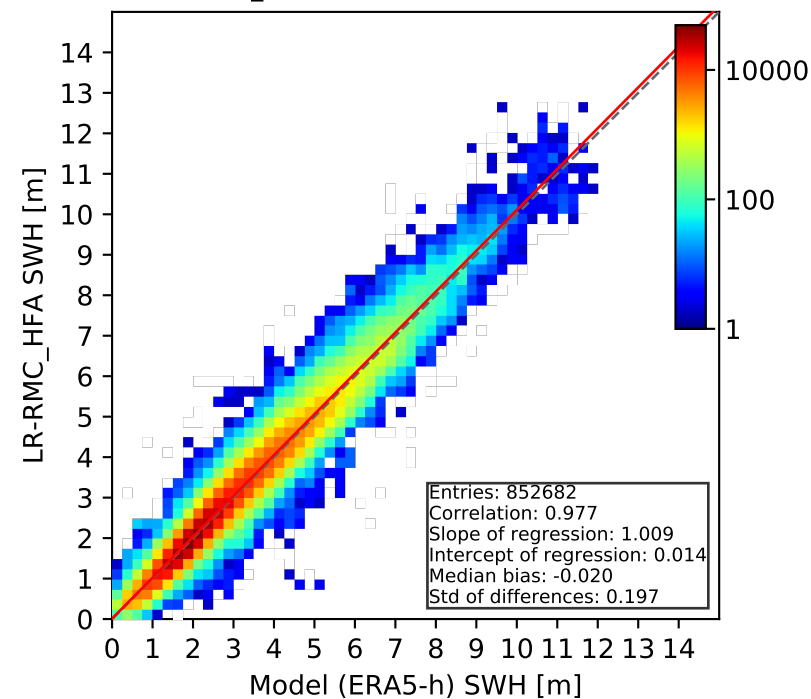

LR-RMC\_HFA (s3) vs. ERA5-h: 0 < SWH < 2 m

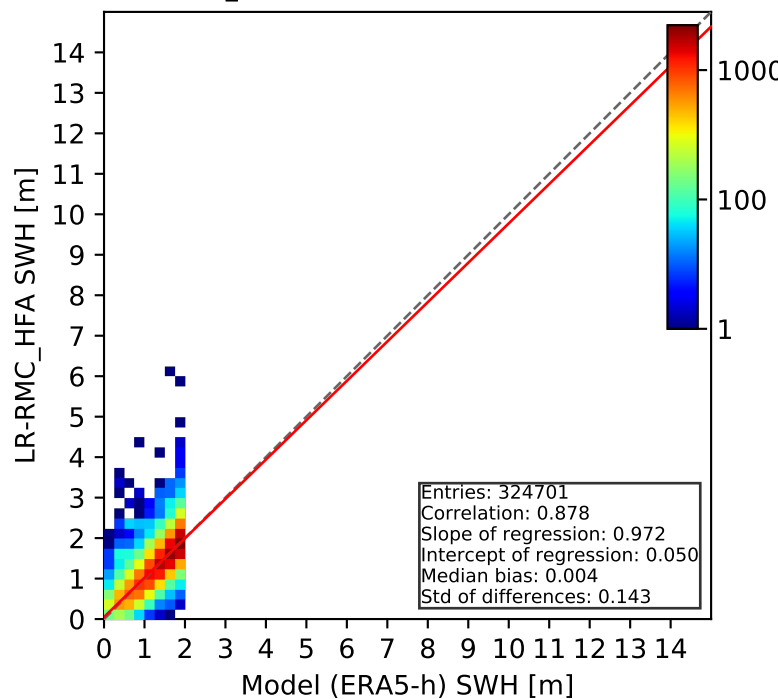



LR-RMC\_HFA (s3) vs. ERA5-h: 2 &lt; SWH &lt; 5 m

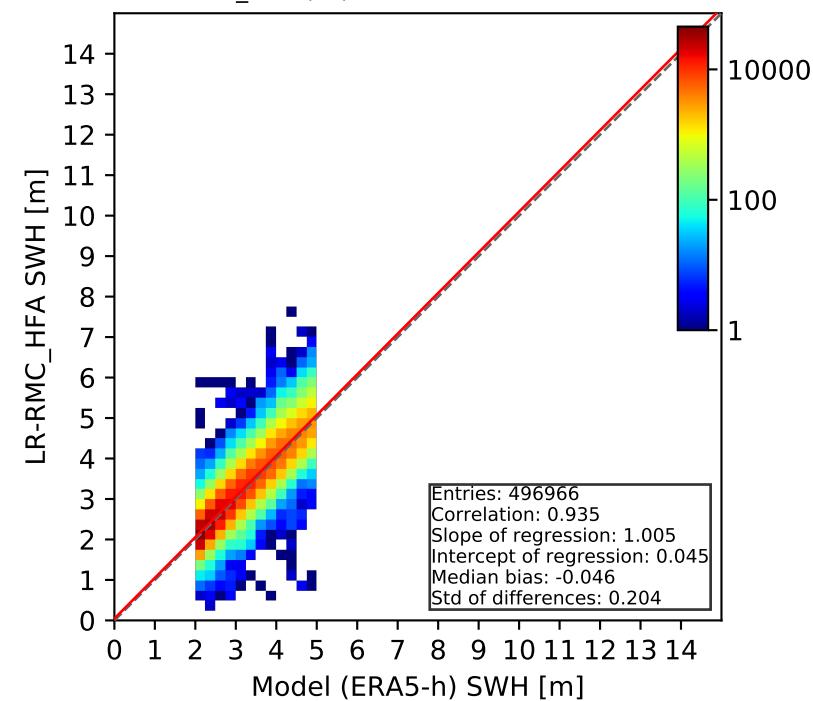

LR-RMC\_HFA (s3) vs. ERA5-h: SWH &gt; 5 m

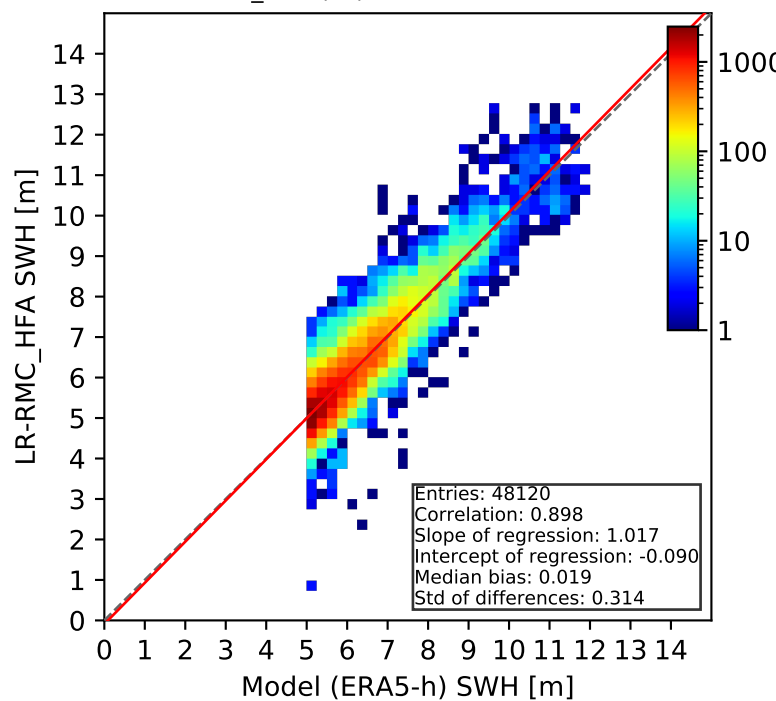

LR-RMC\_HFA (s3) vs. ERA5-h: SWH &gt; 10 m

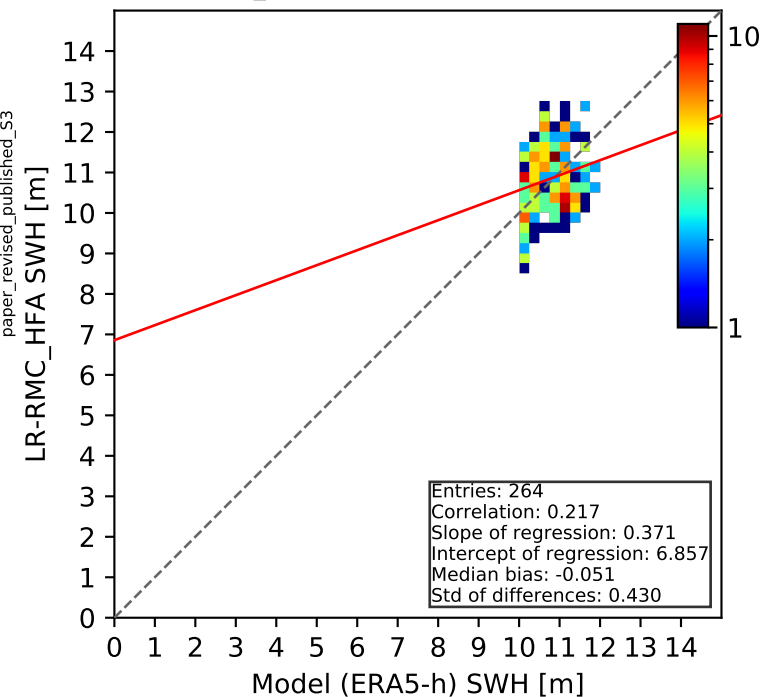

MLE-4-PLRM (s3-plrm) vs. ERA5-h: d2c &gt; 0 km

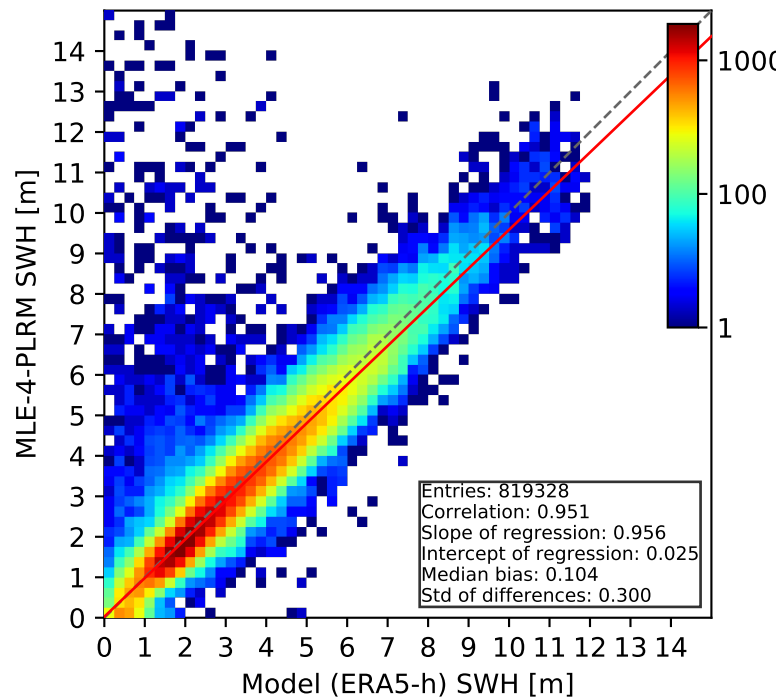

MLE-4-PLRM (s3-plrm) vs. ERA5-h: d2c &lt; 5 km

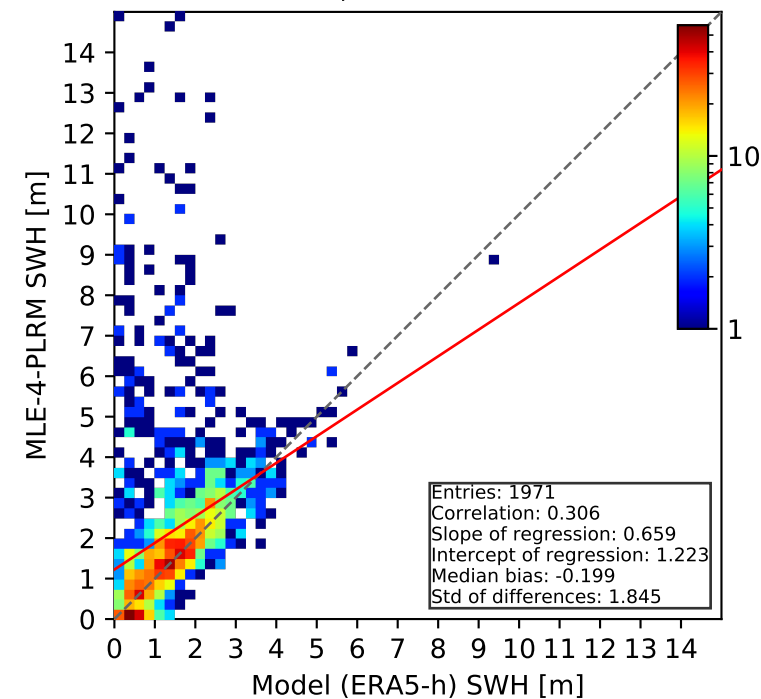

MLE-4-PLRM (s3-plrm) vs. ERA5-h: d2c &lt; 10 km

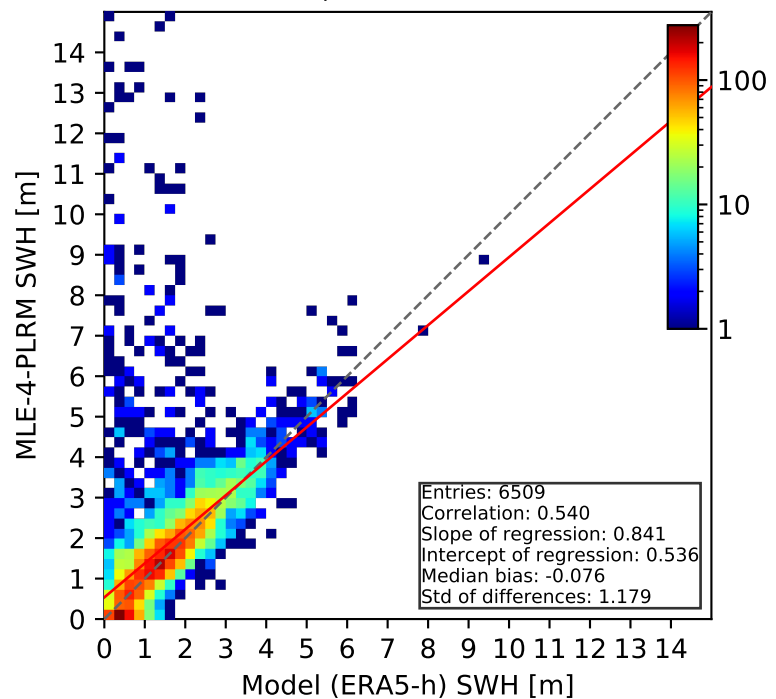



MLE-4-PLRM (s3-plrm) vs. ERA5-h: d2c <= 20 km

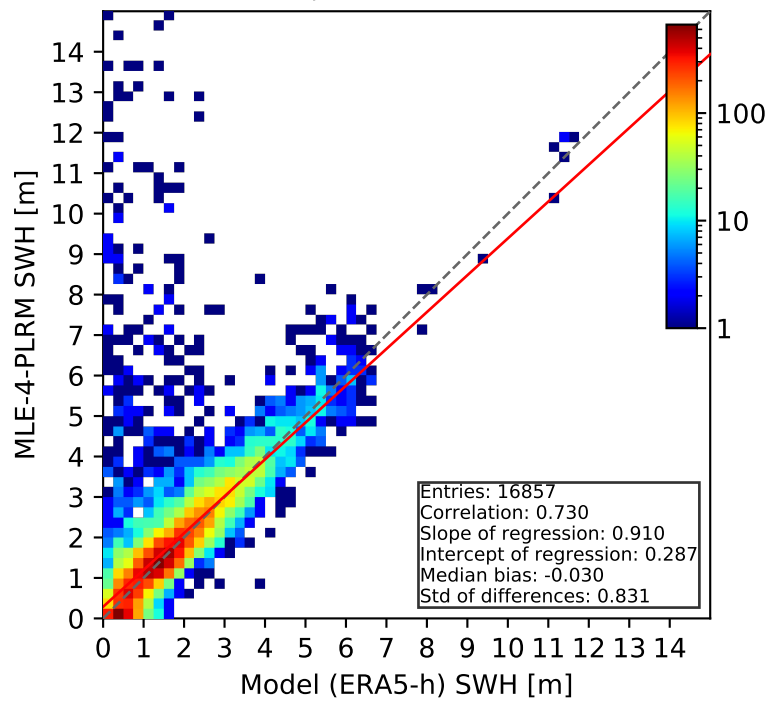

MLE-4-PLRM (s3-plrm) vs. ERA5-h: d2c > 20 km

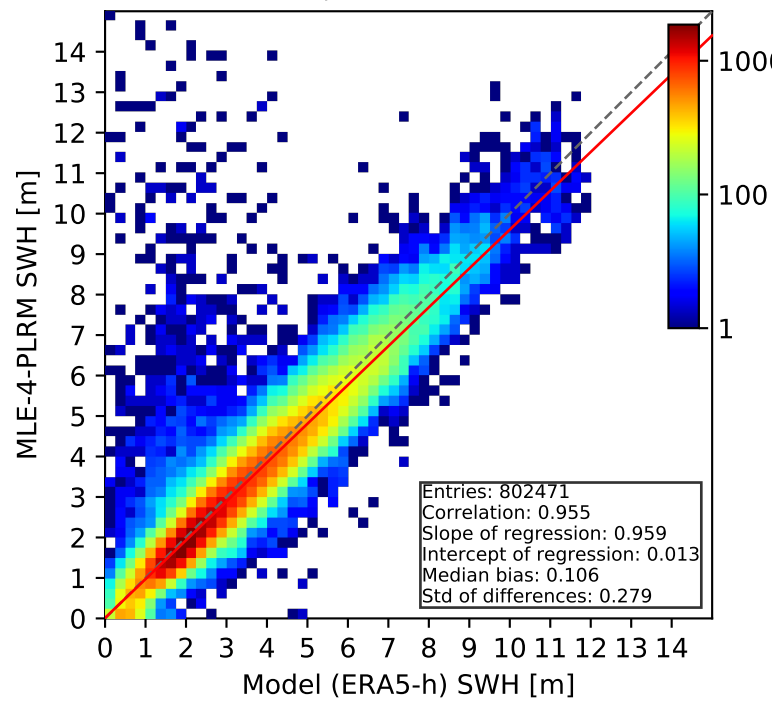

MLE-4-PLRM (s3-plrm) vs. ERA5-h: 0 < SWH < 2 m

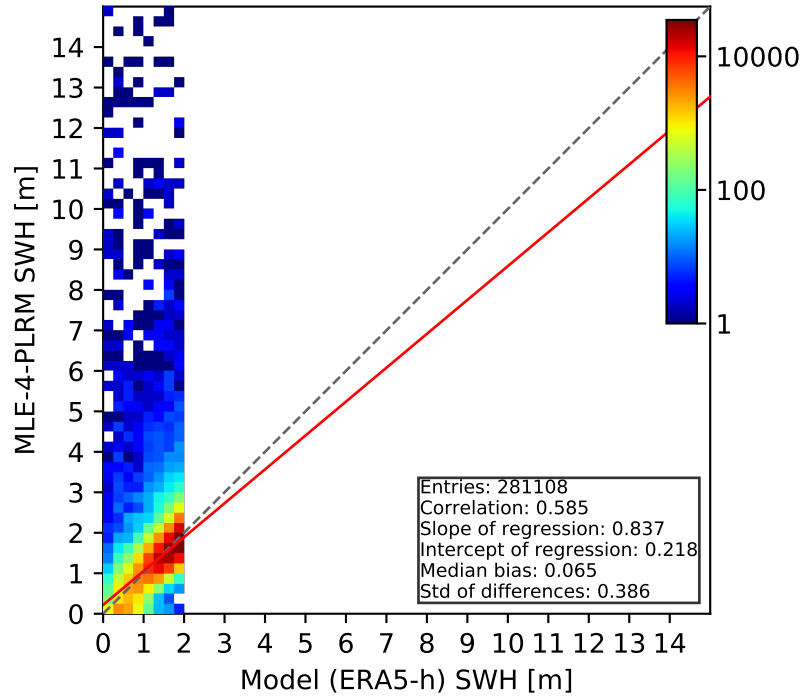

MLE-4-PLRM (s3-plrm) vs. ERA5-h: 2 < SWH < 5 m

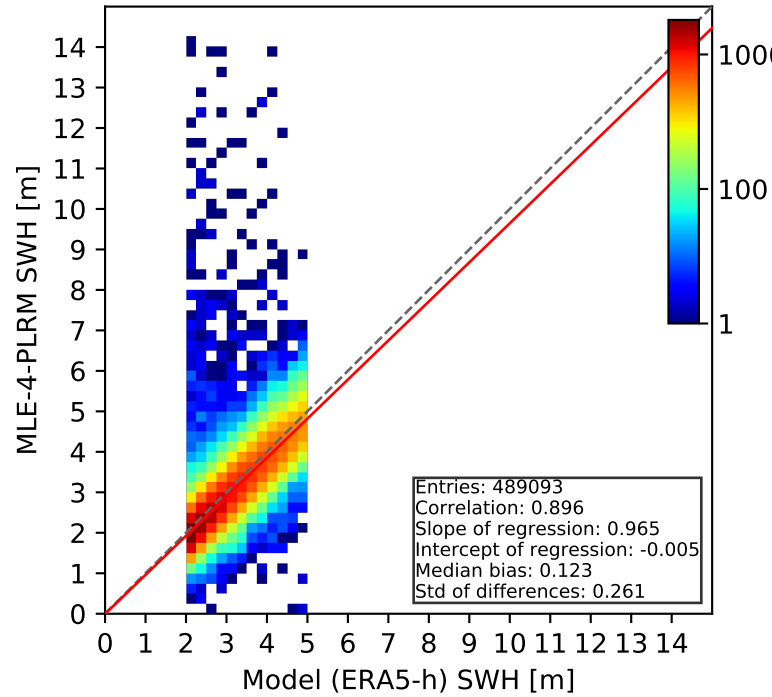

MLE-4-PLRM (s3-plrm) vs. ERA5-h: SWH > 5 m

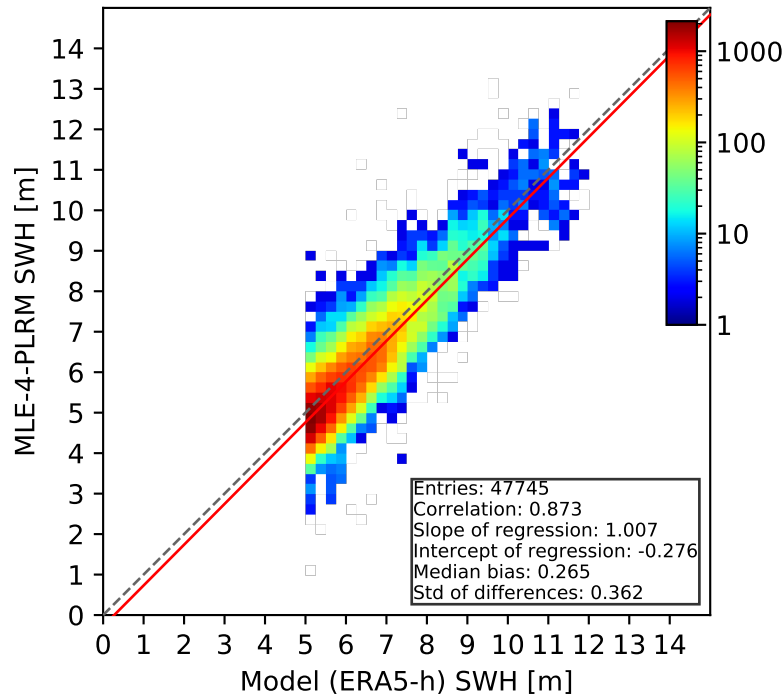

MLE-4-PLRM (s3-plrm) vs. ERA5-h: SWH > 10 m

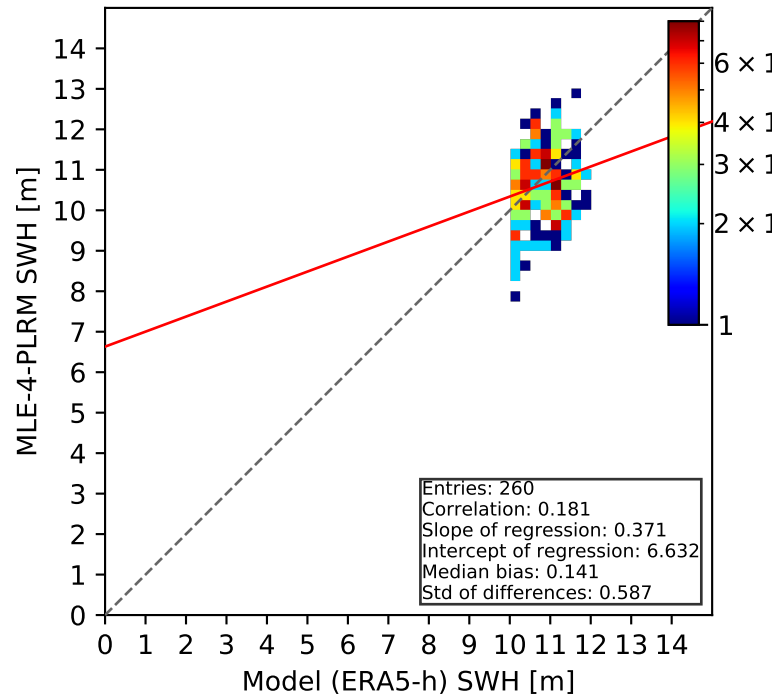

TALES-PLRM (s3-plrm) vs. ERA5-h: d2c > 0 km

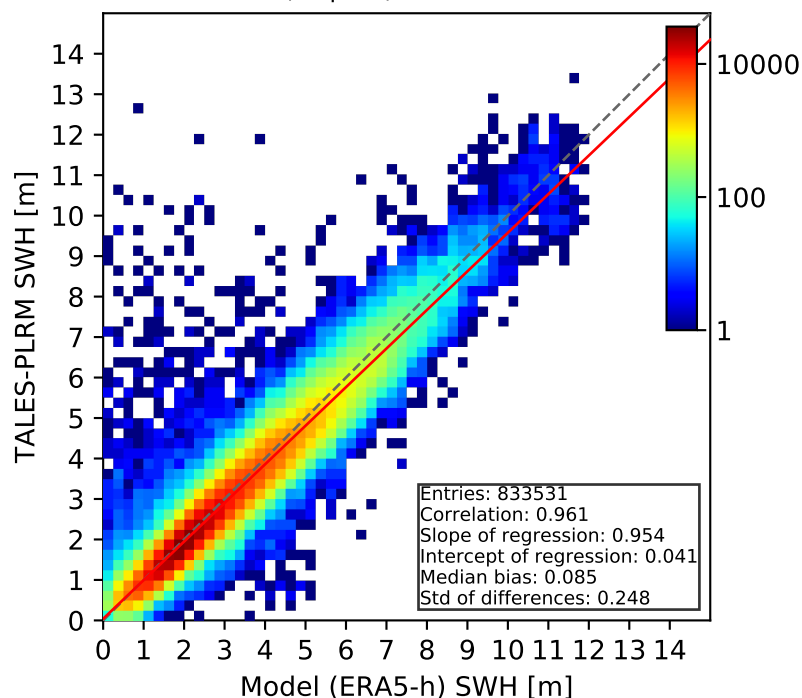

TALES-PLRM (s3-plrm) vs. ERA5-h: d2c < 5 km

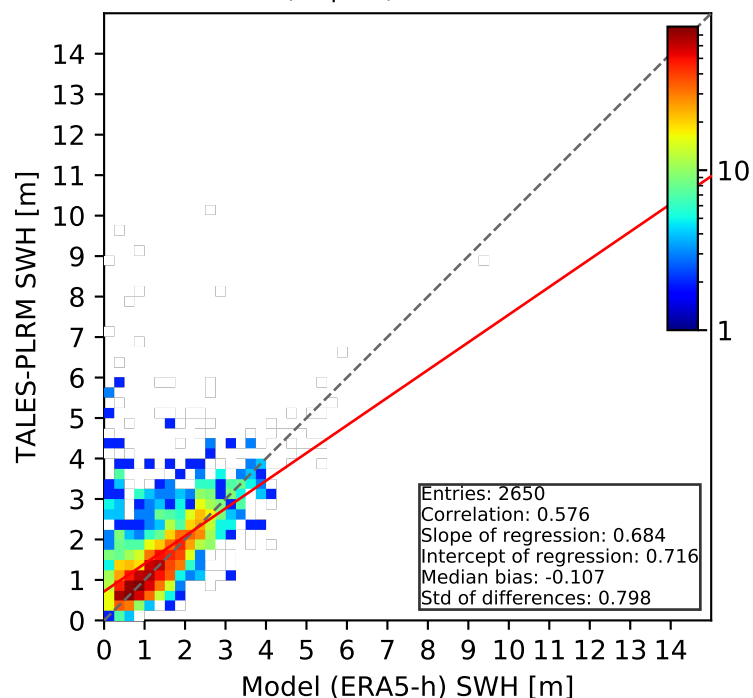

TALES-PLRM (s3-plrm) vs. ERA5-h: d2c < 10 km

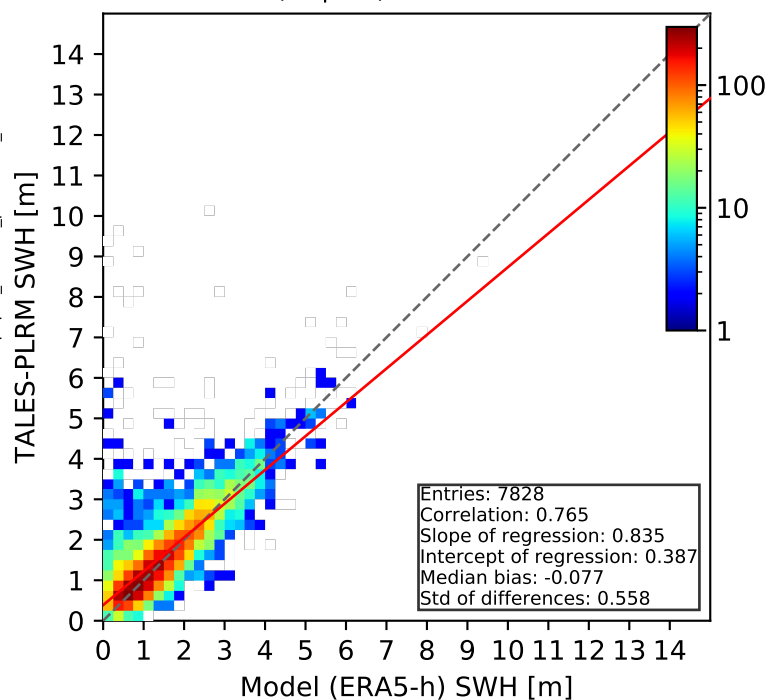

TALES-PLRM (s3-plrm) vs. ERA5-h: d2c <= 20 km

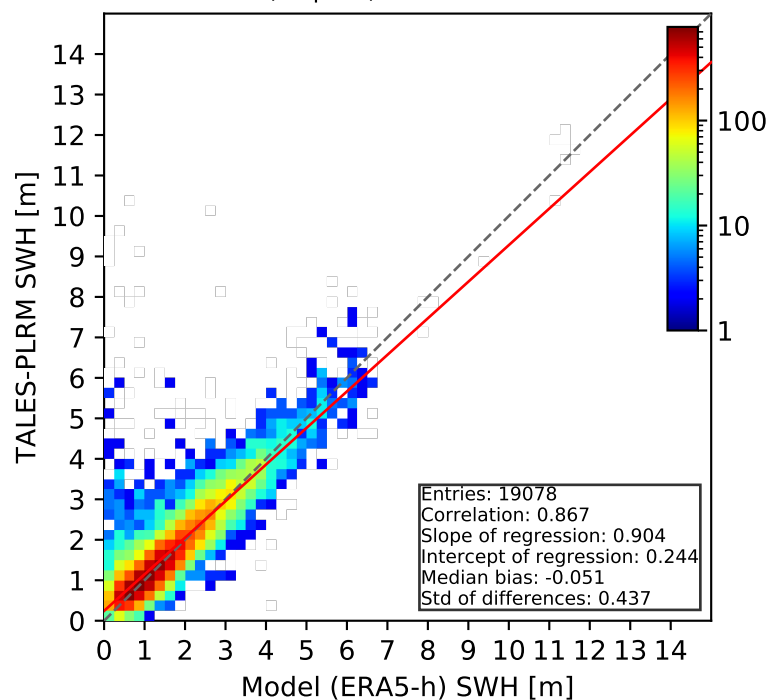

TALES-PLRM (s3-plrm) vs. ERA5-h: d2c > 20 km

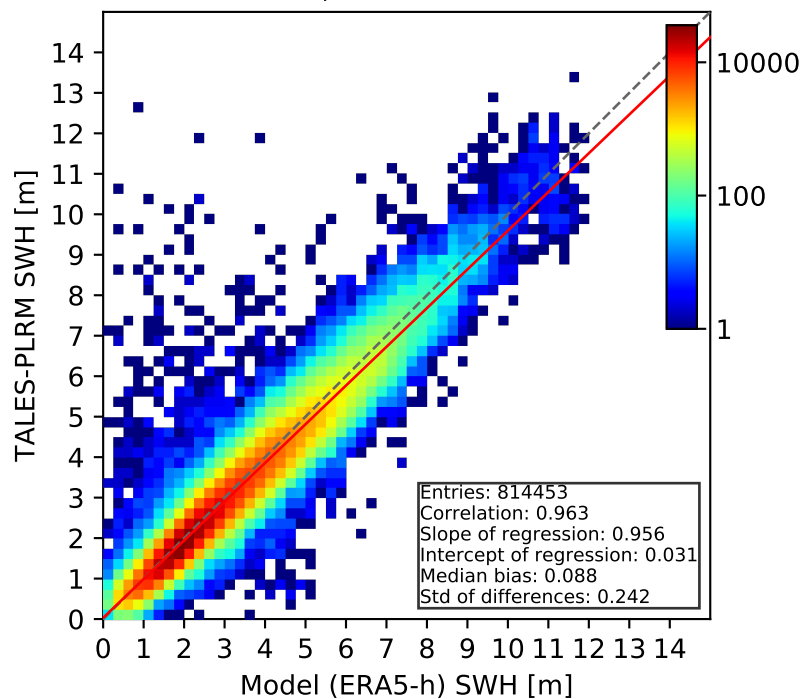

TALES-PLRM (s3-plrm) vs. ERA5-h: 0 < SWH < 2 m

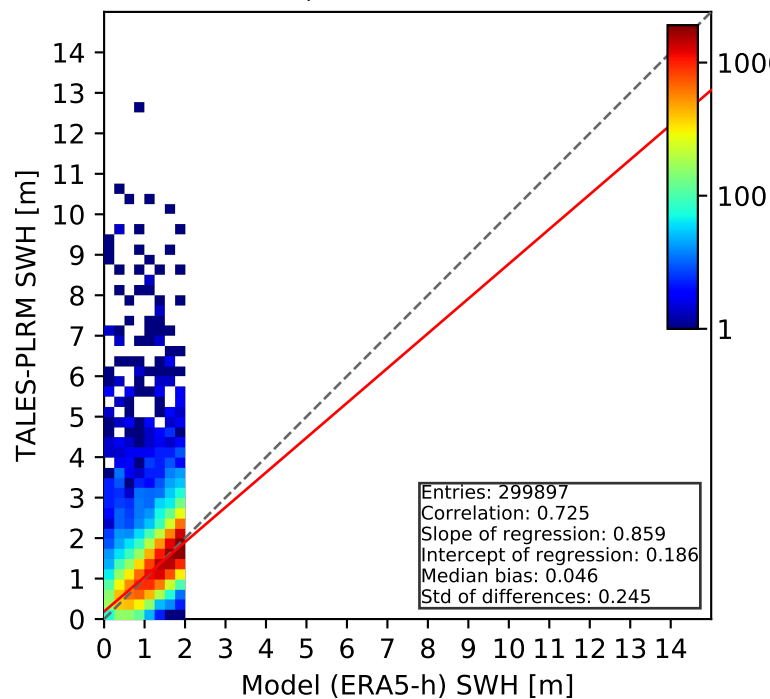

TALES-PLRM (s3-plrm) vs. ERA5-h:  $2 < \text{SWH} < 5 \text{ m}$

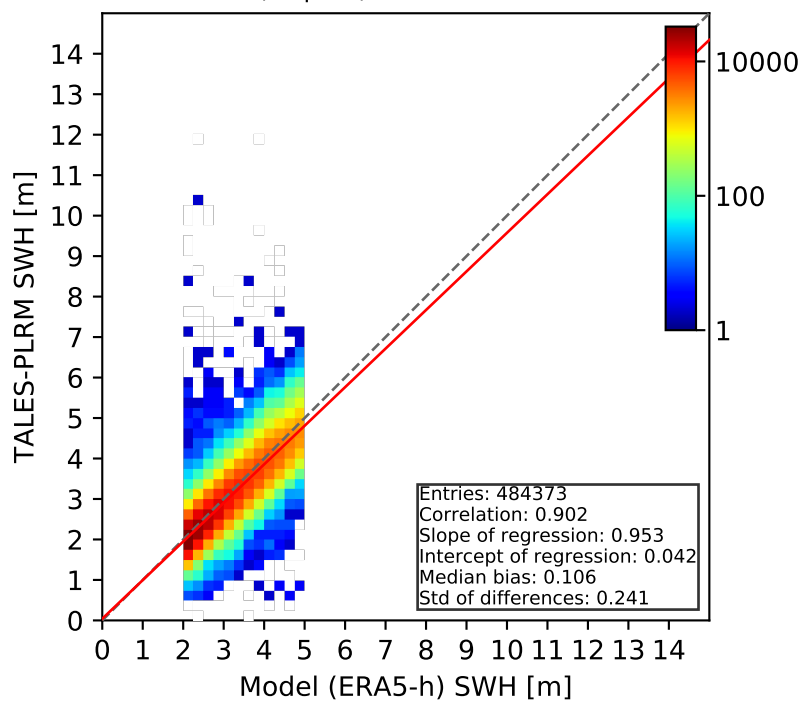

TALES-PLRM (s3-plrm) vs. ERA5-h:  $\text{SWH} > 5 \text{ m}$

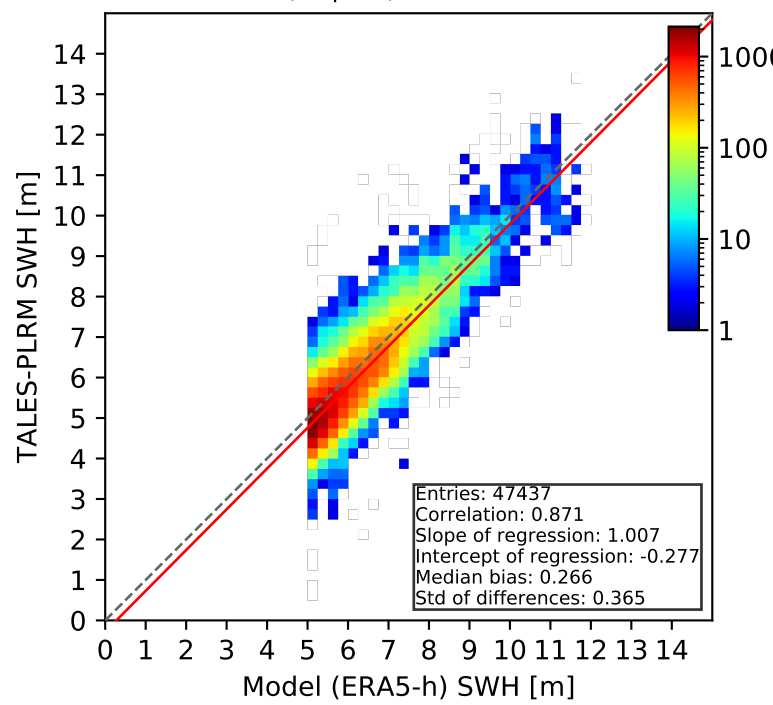

TALES-PLRM (s3-plrm) vs. ERA5-h:  $\text{SWH} > 10 \text{ m}$

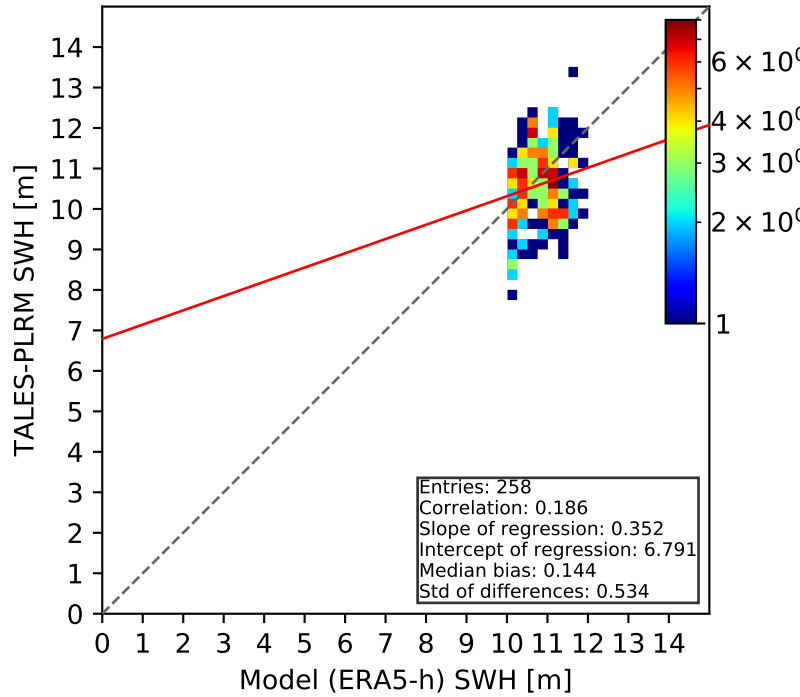

STARv2-PLRM (s3-plrm) vs. ERA5-h:  $\text{d2c} > 0 \text{ km}$

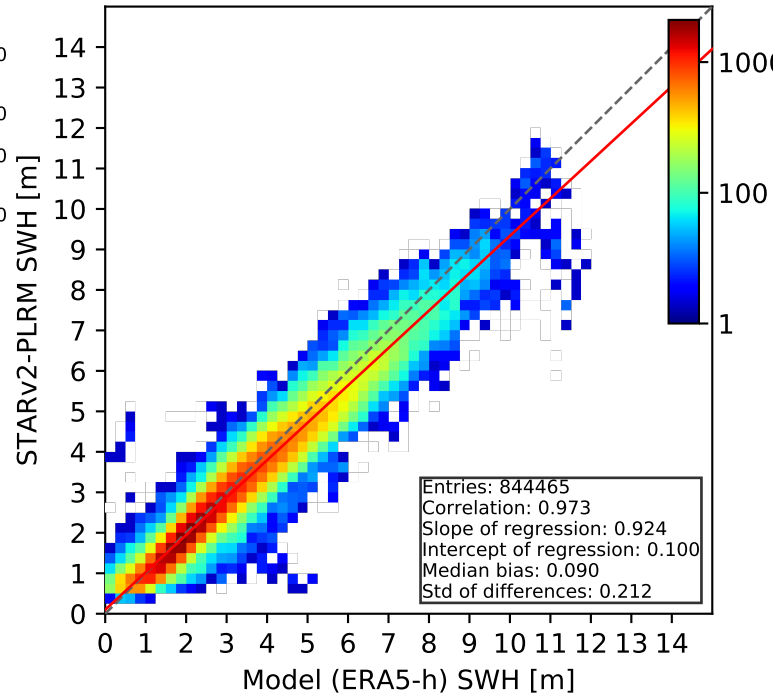

STARv2-PLRM (s3-plrm) vs. ERA5-h:  $\text{d2c} < 5 \text{ km}$

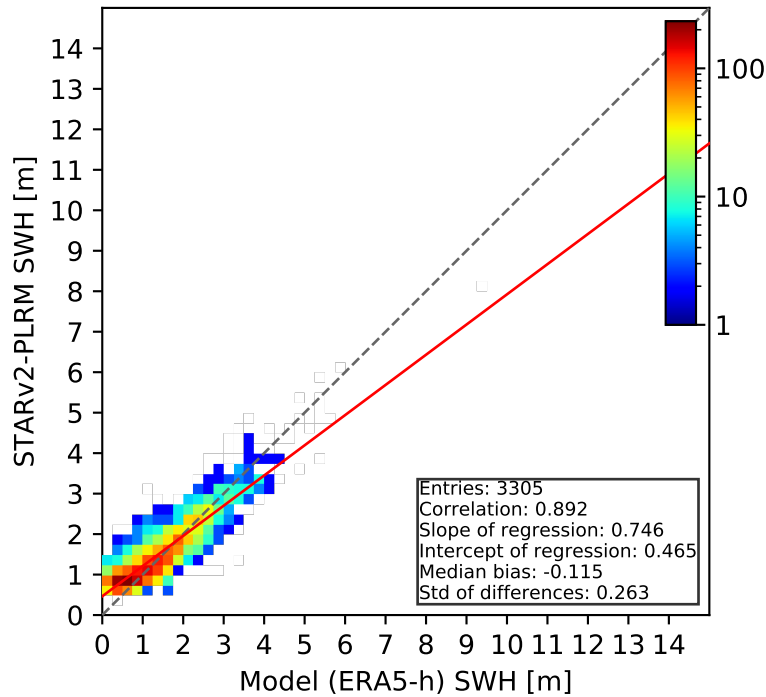

STARv2-PLRM (s3-plrm) vs. ERA5-h:  $\text{d2c} < 10 \text{ km}$

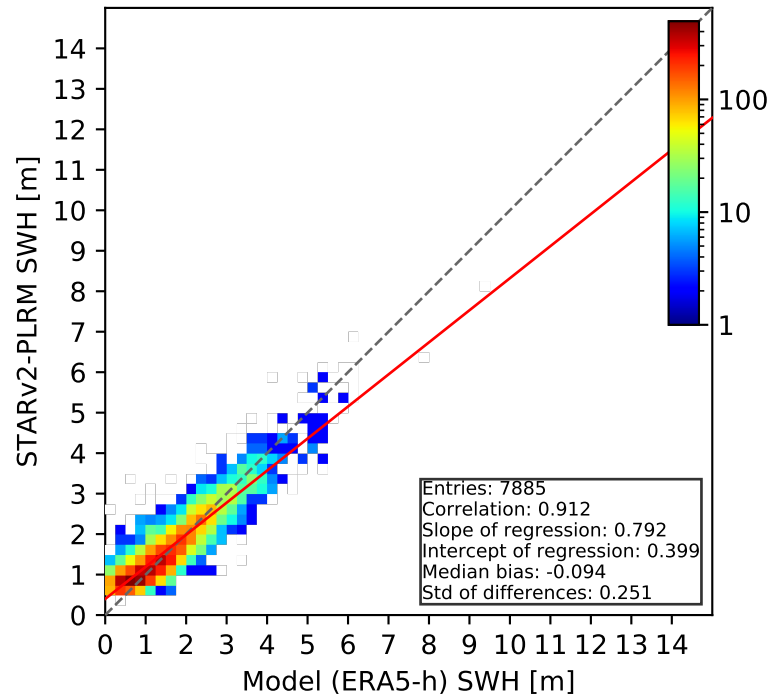

STARv2-PLRM (s3-plrm) vs. ERA5-h: d2c <= 20 km

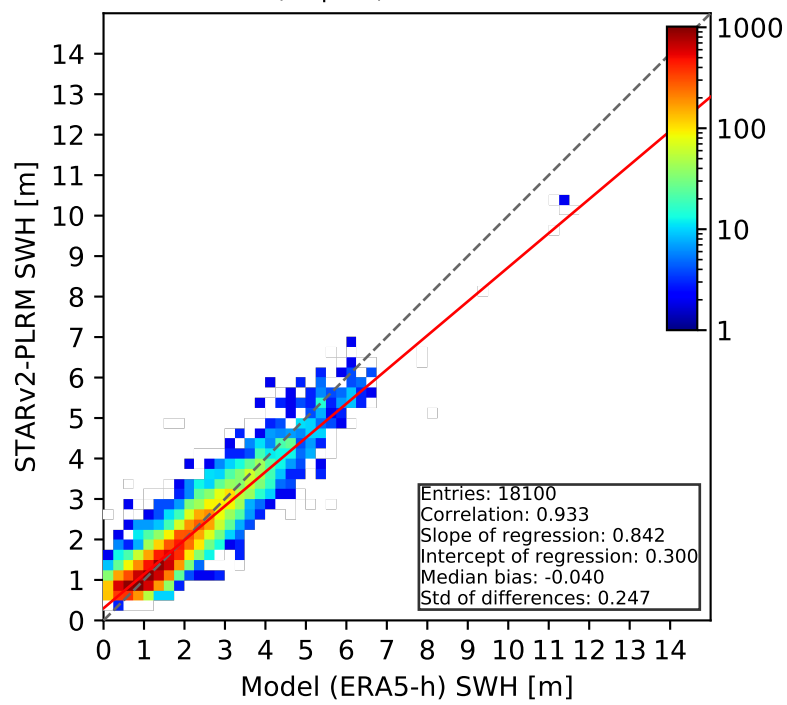

STARv2-PLRM (s3-plrm) vs. ERA5-h: d2c > 20 km

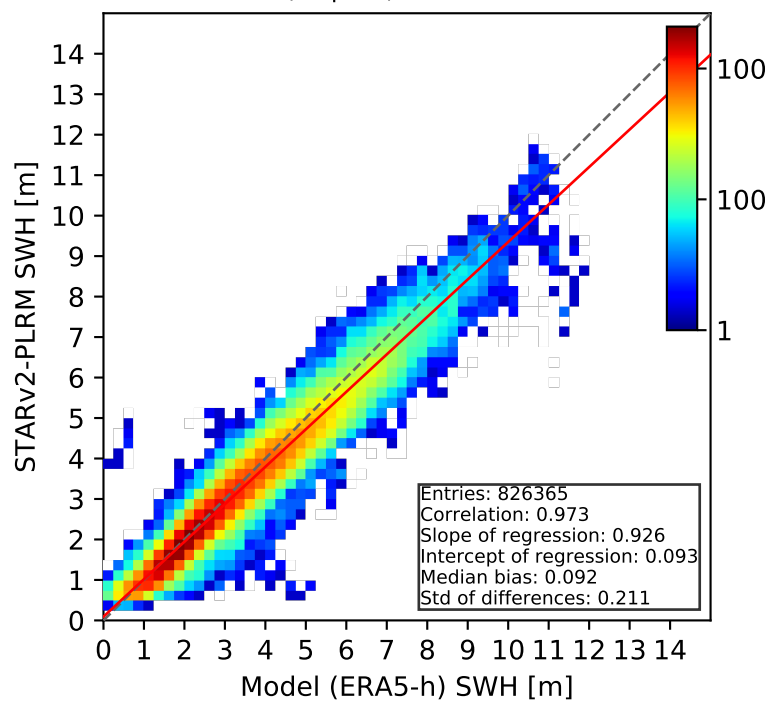

STARv2-PLRM (s3-plrm) vs. ERA5-h: 0 < SWH < 2 m

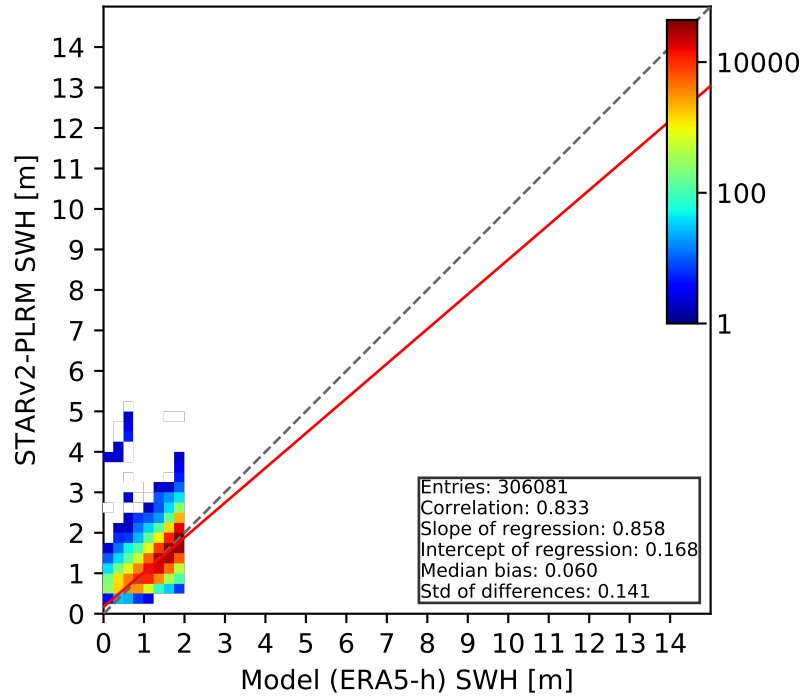

STARv2-PLRM (s3-plrm) vs. ERA5-h: 2 < SWH < 5 m

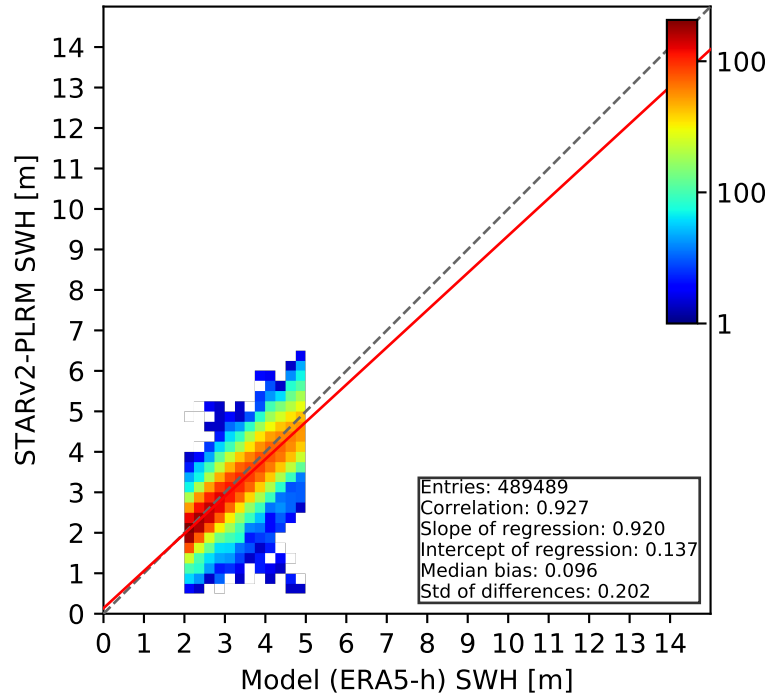

STARv2-PLRM (s3-plrm) vs. ERA5-h: SWH > 5 m

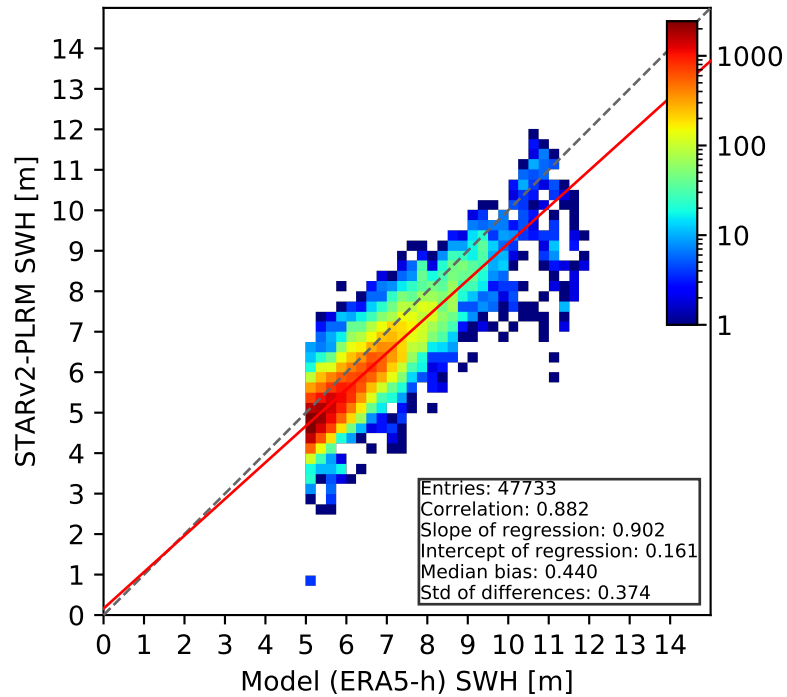

STARv2-PLRM (s3-plrm) vs. ERA5-h: SWH > 10 m

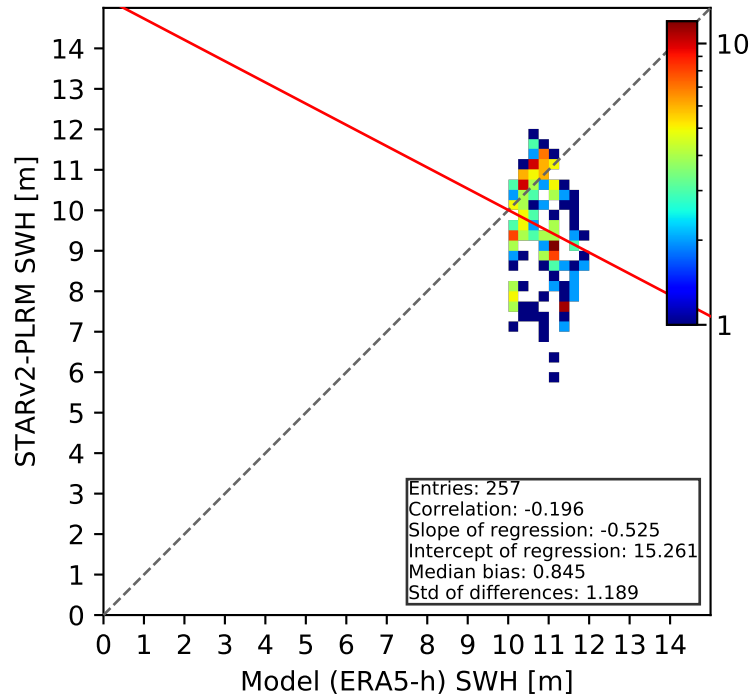

Supplement: s1 [file s1]
