# Supplementary material
Source: MDPI journal article supplement (https://www.mdpi.com/2072-4292/12/8/1254)

MLE-3

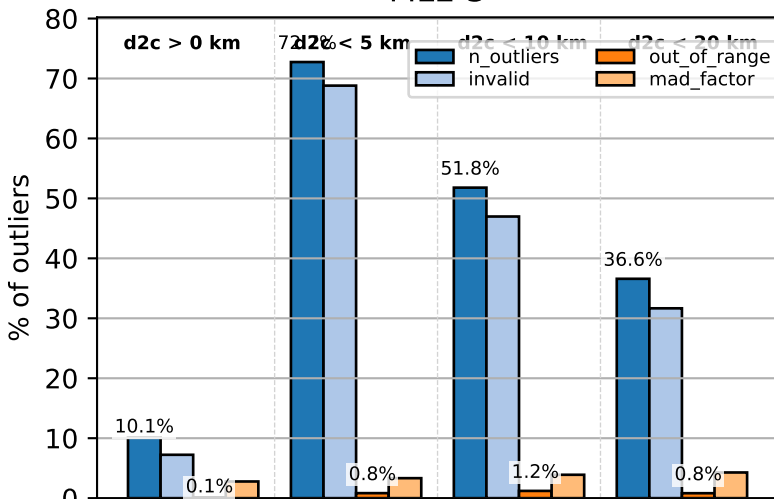

MLE-4

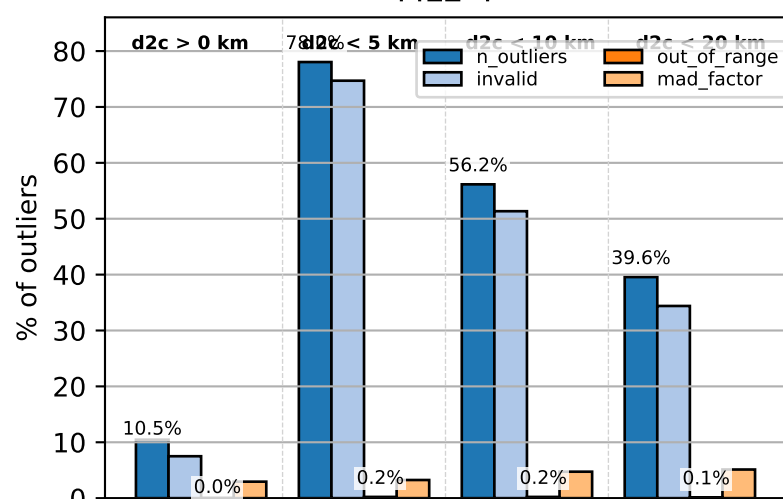

Brown-Peaky

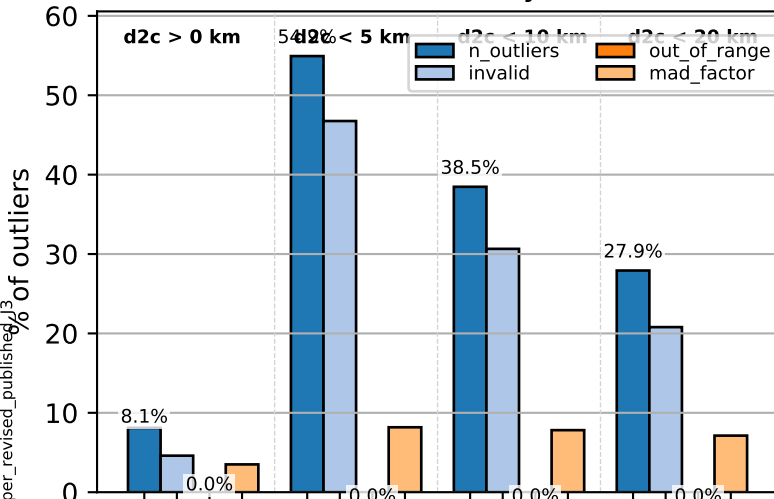

WHALES

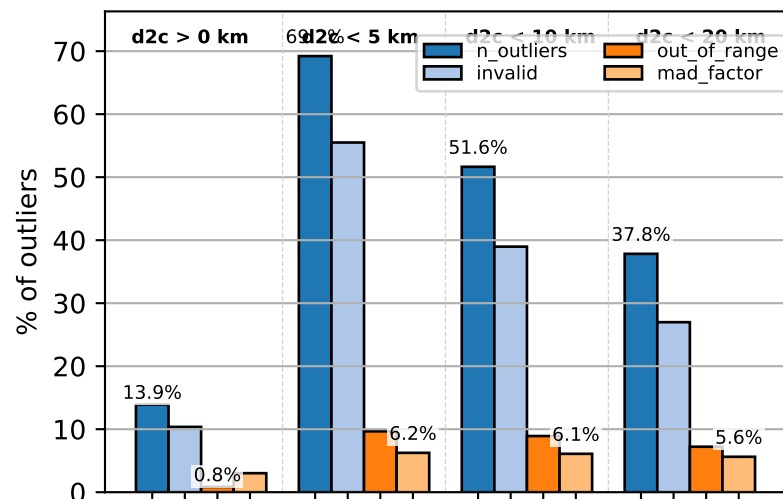

WHALES\_adj

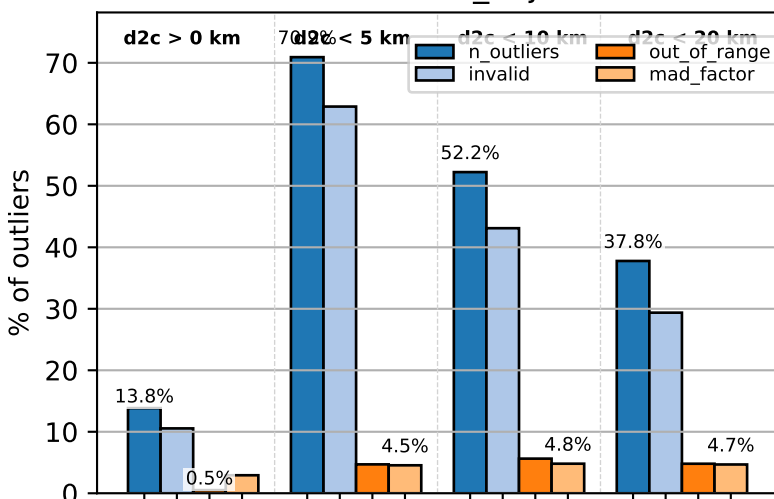

WHALES\_realPTR

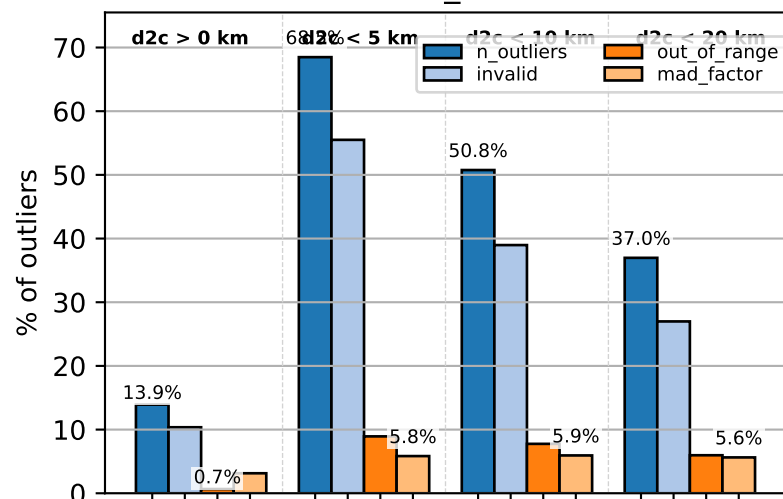

WHALES\_realPTR\_adj

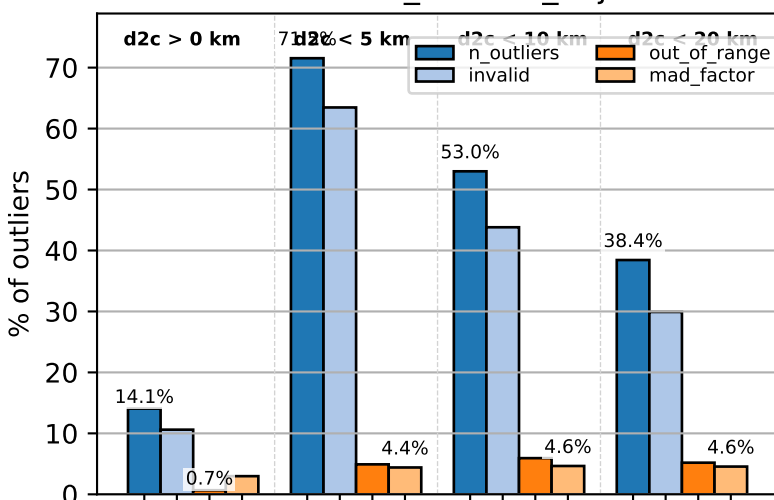

Adaptive

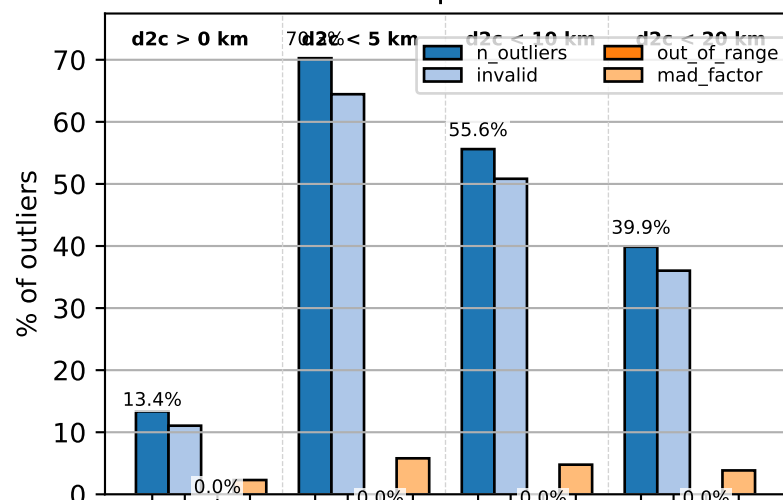

Adaptive\_HFA

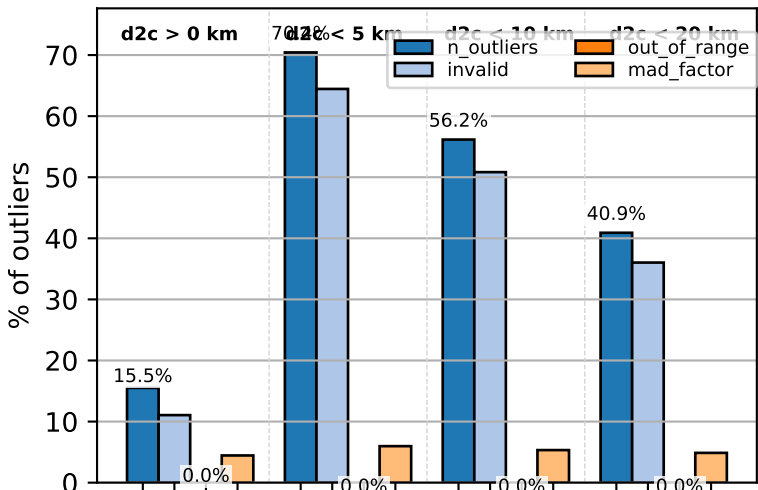

TALES

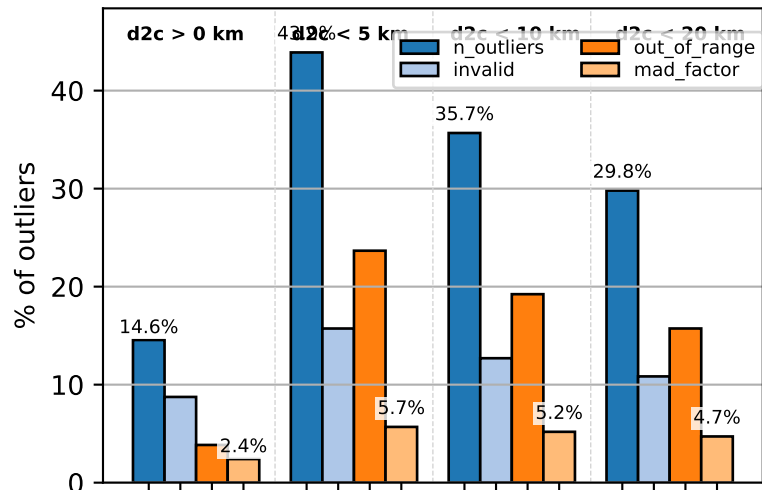

STARv2

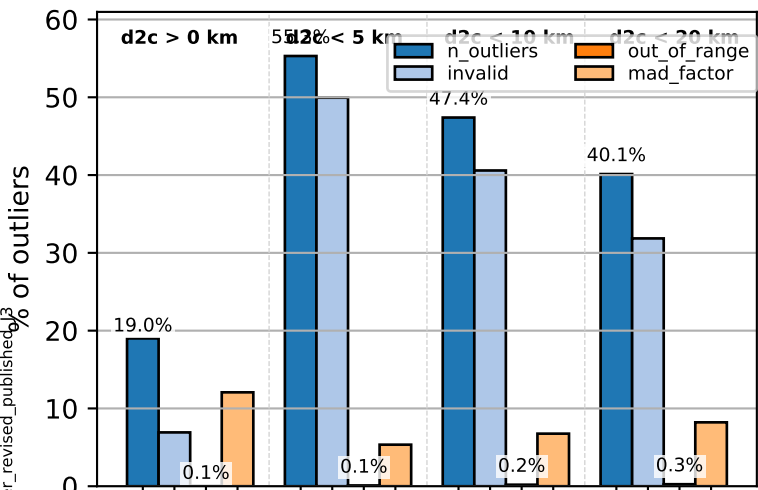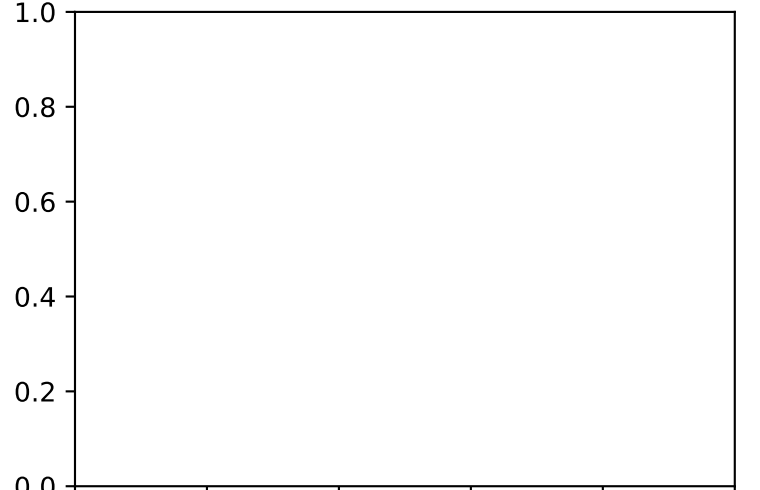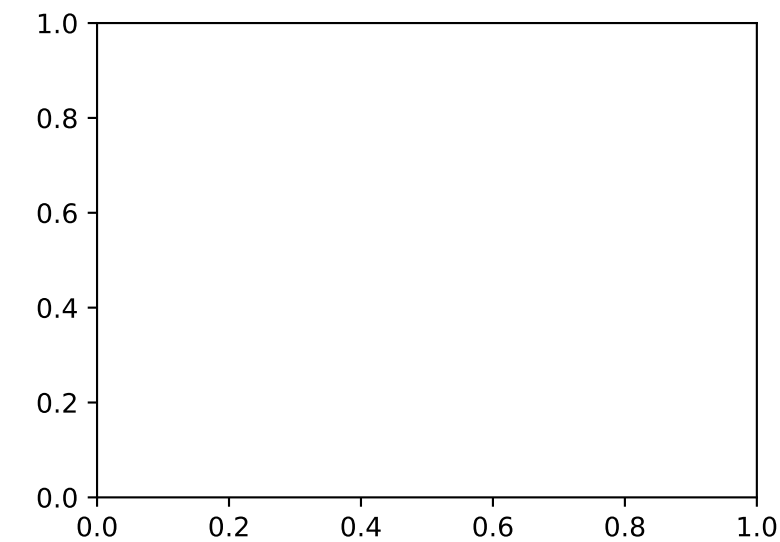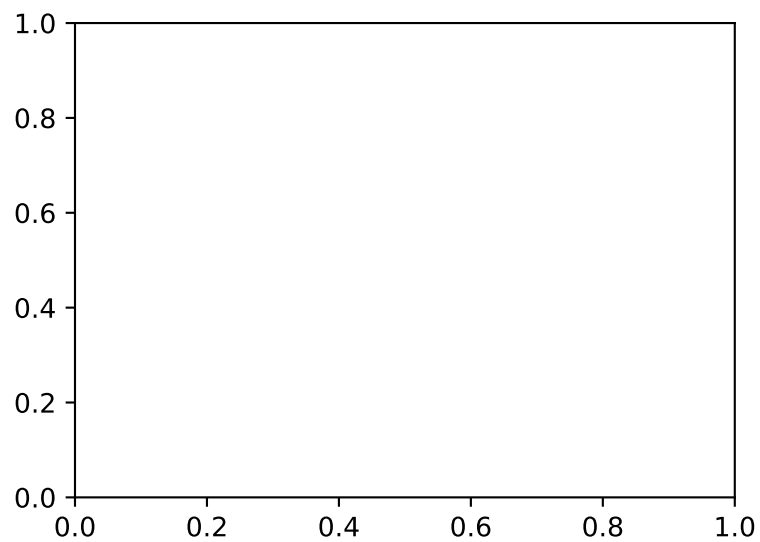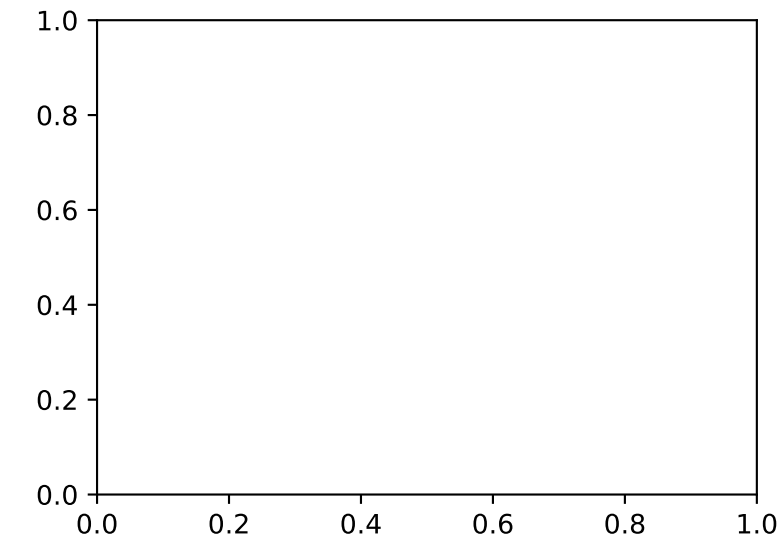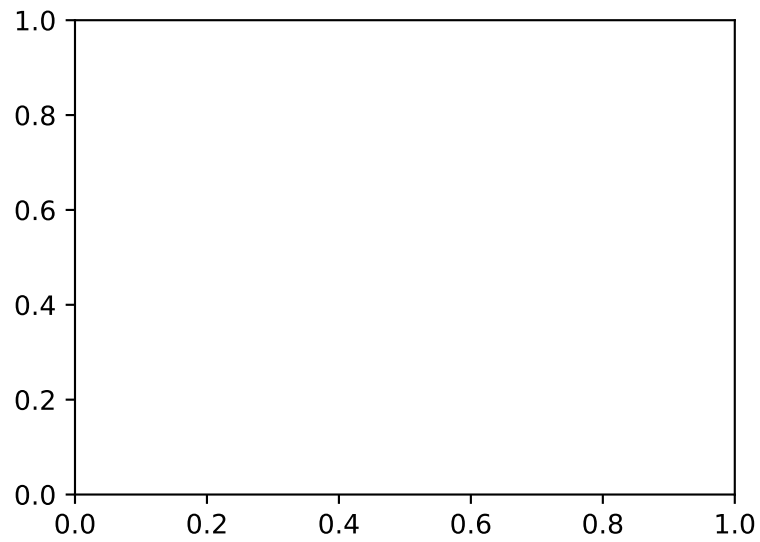

n\_outliers

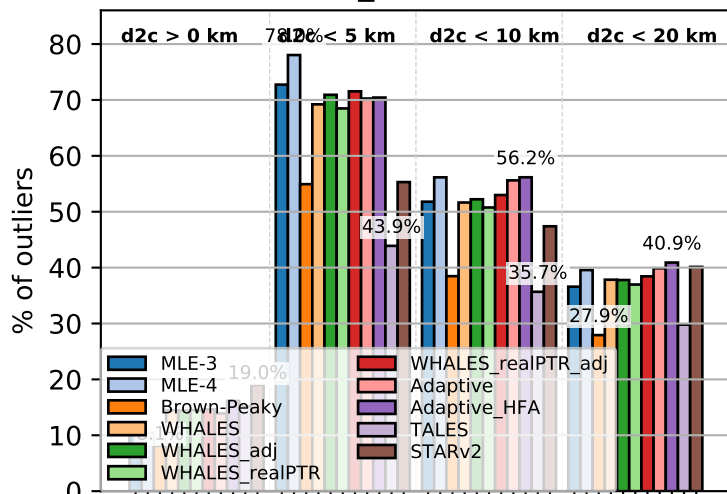

invalid

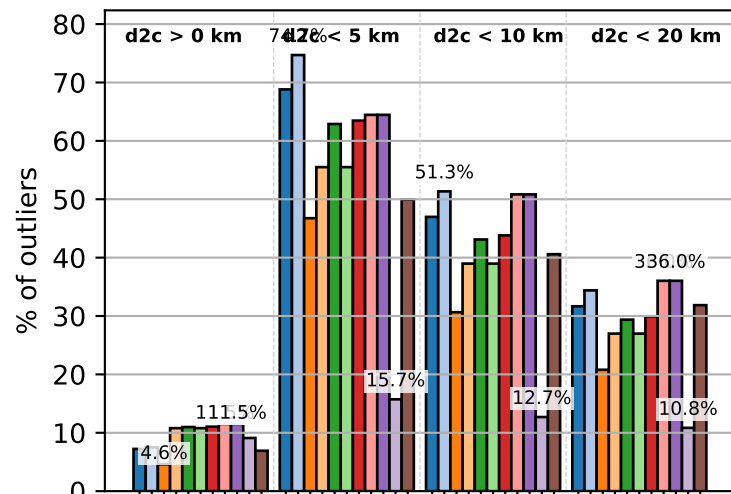

out\_of\_range

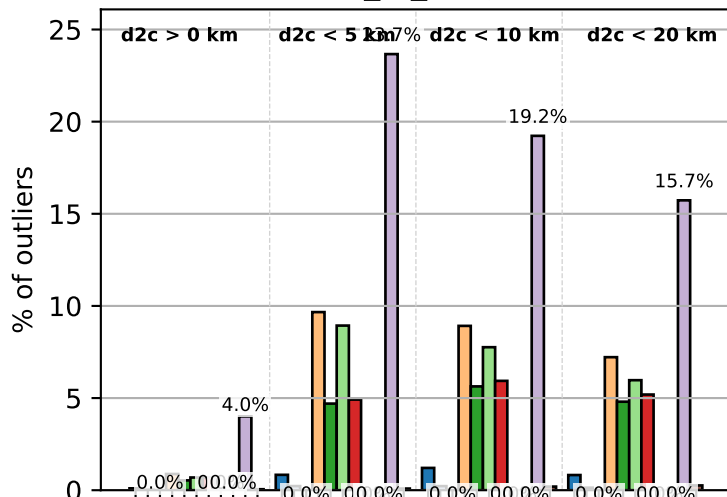

mad\_factor

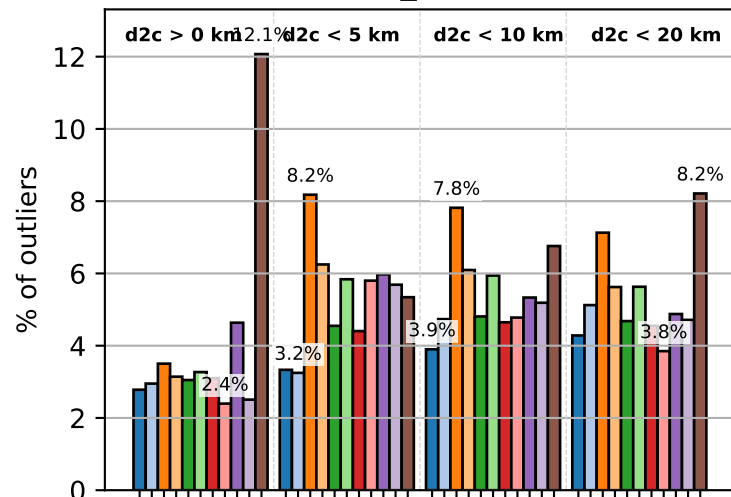

n\_valid

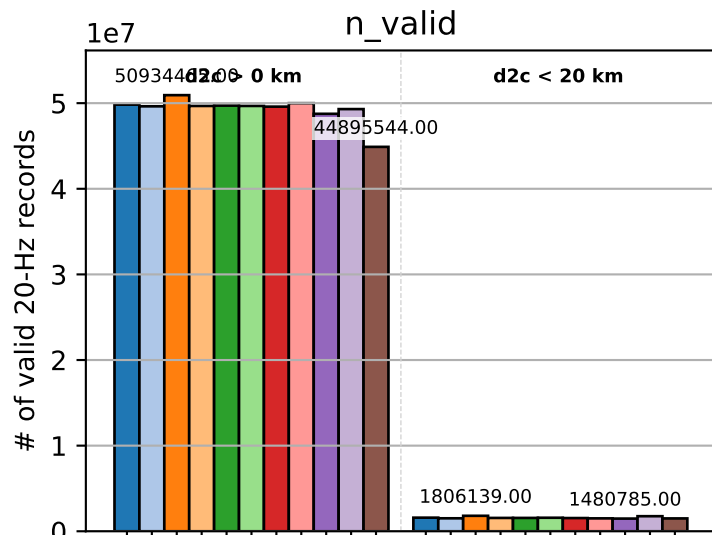

n\_valid

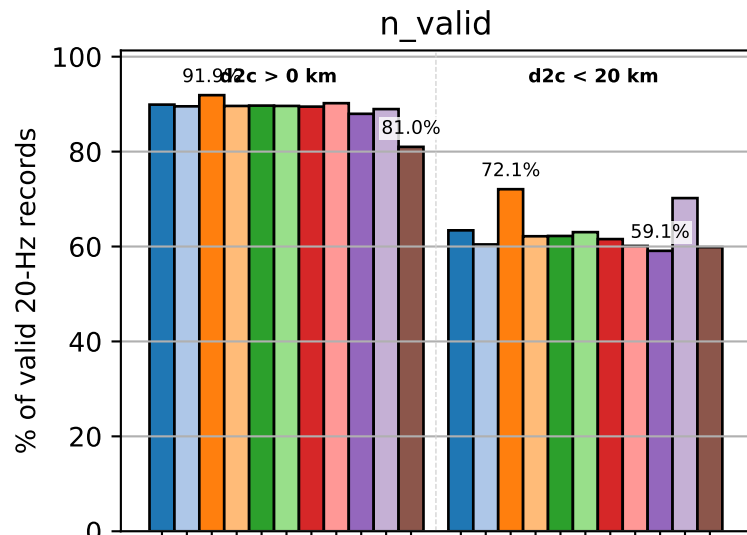

n\_valid

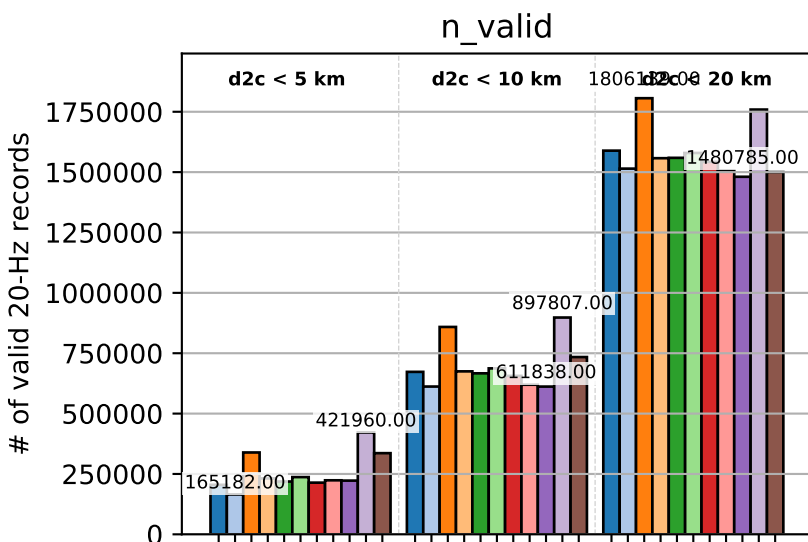

n\_valid

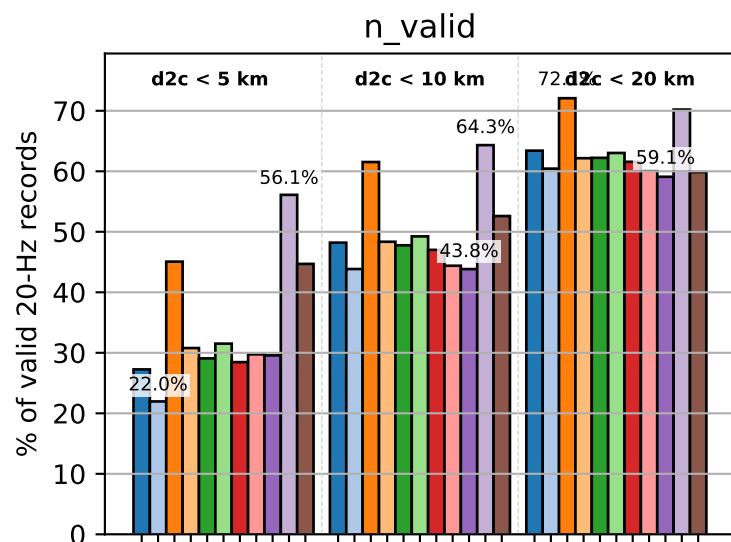

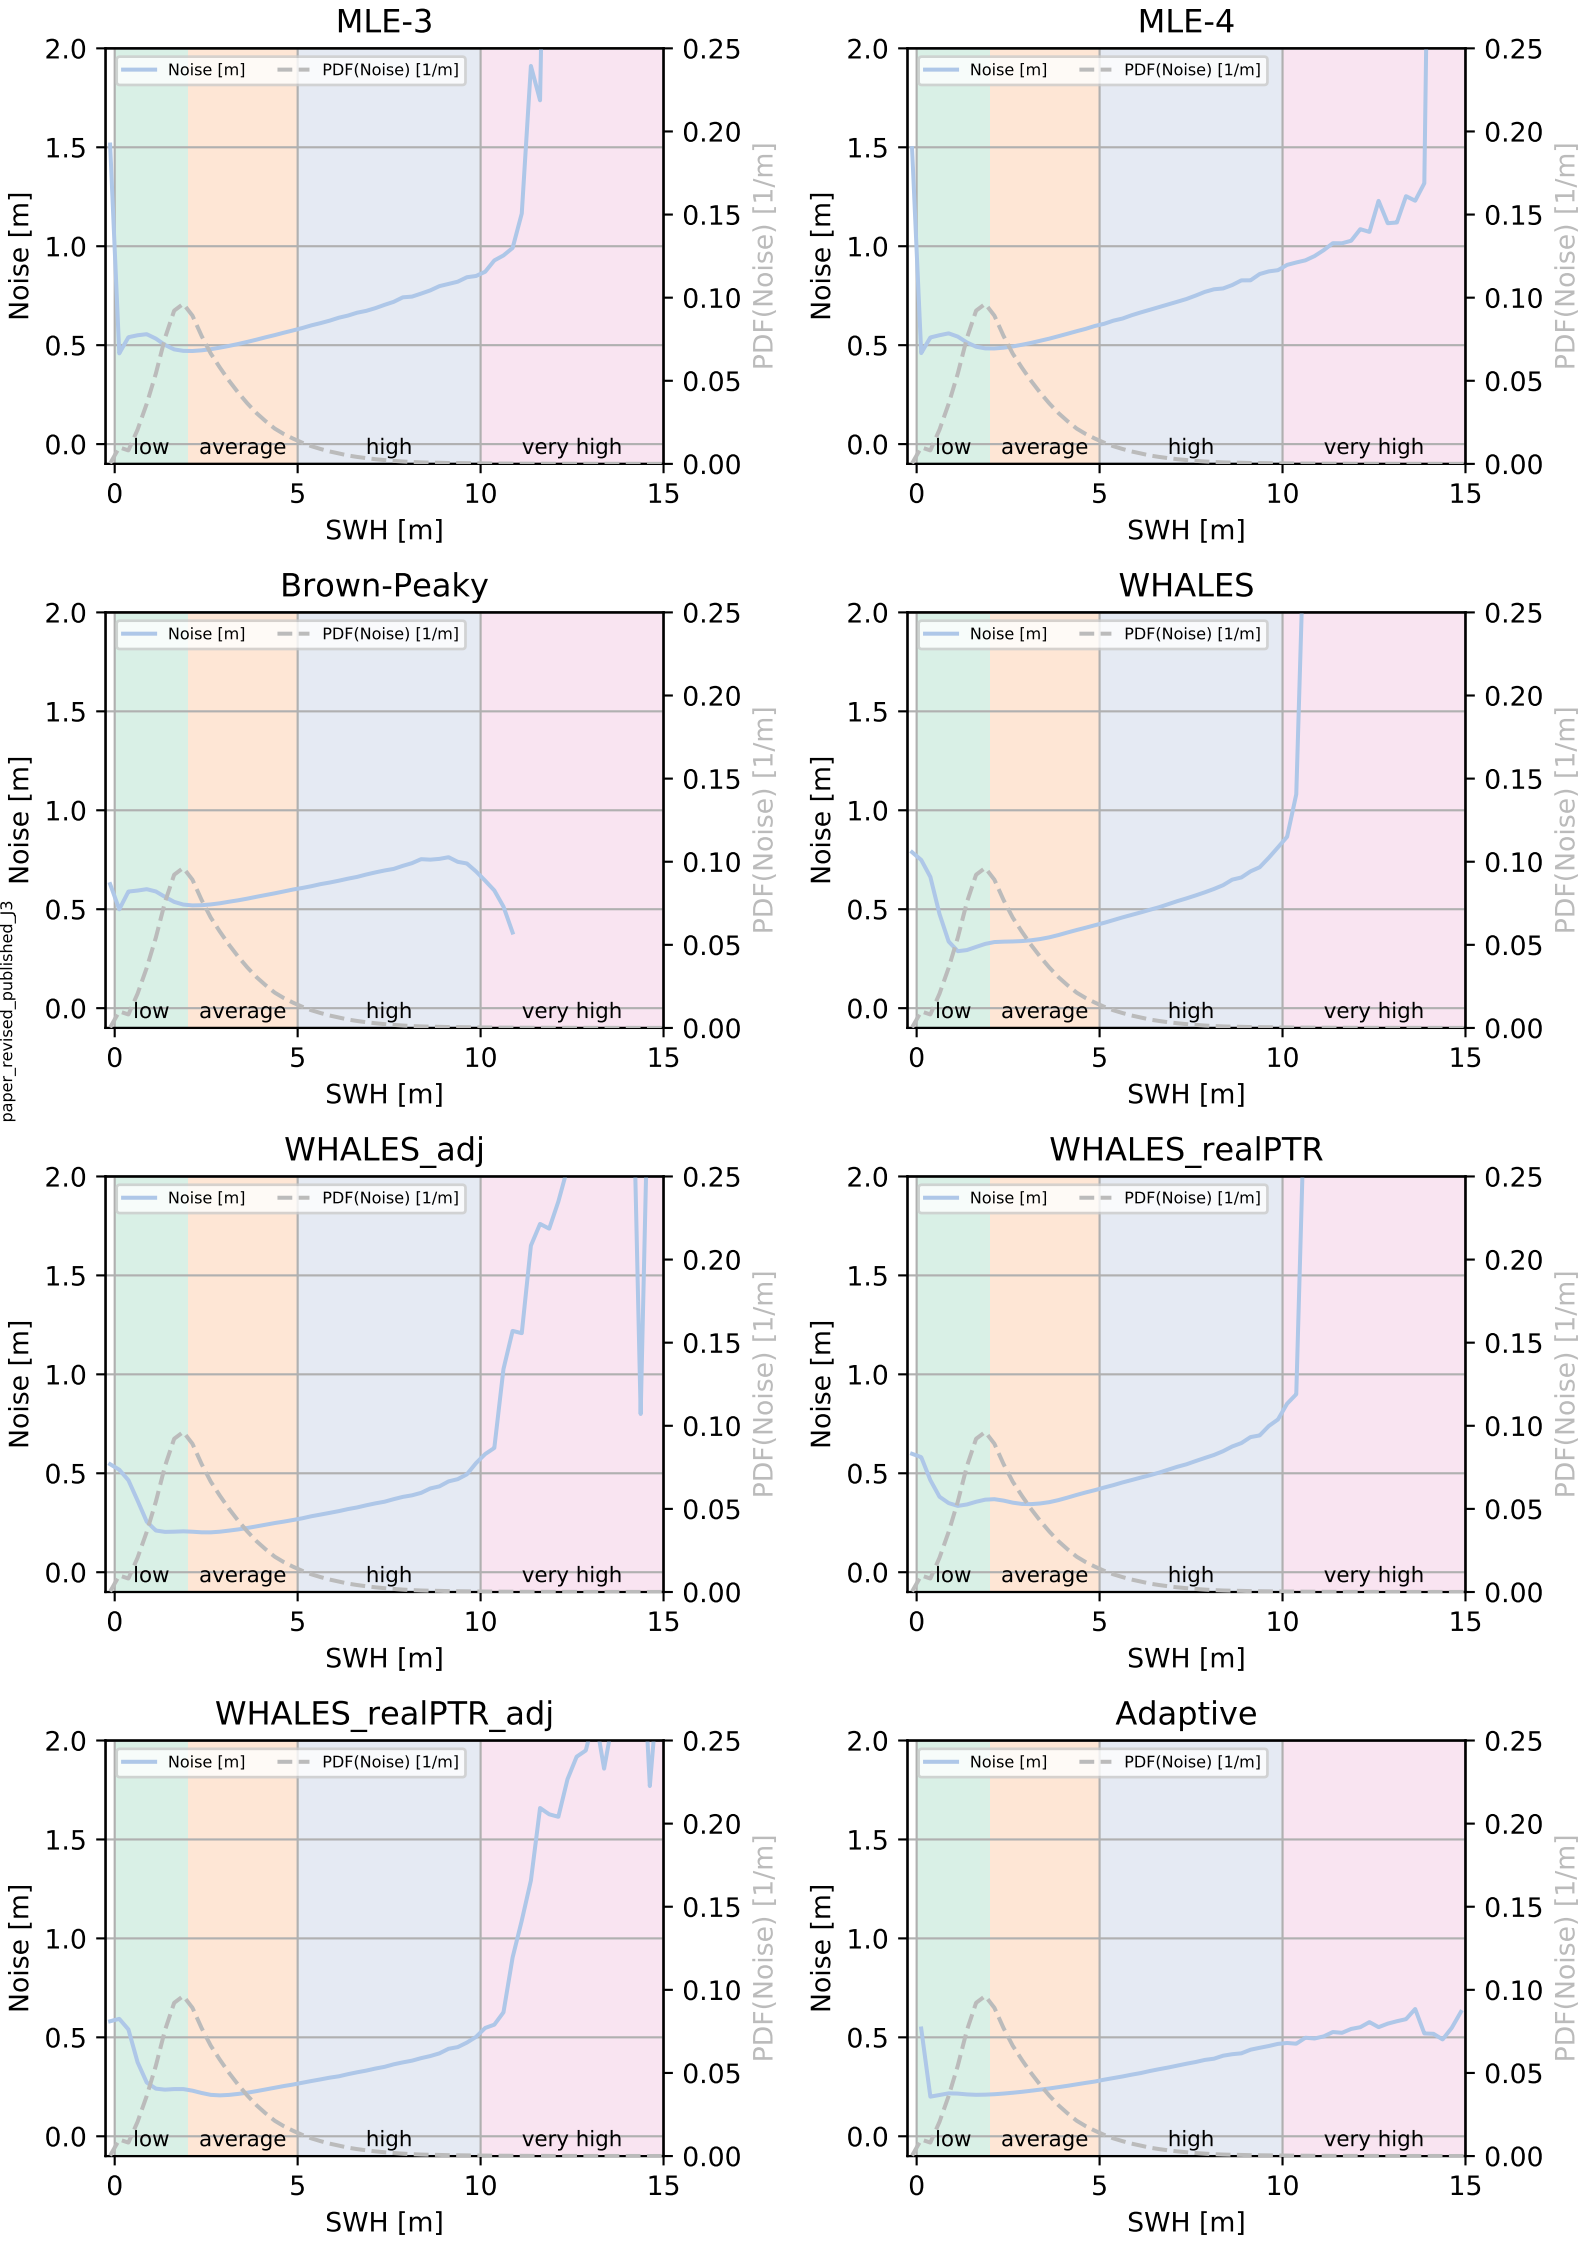

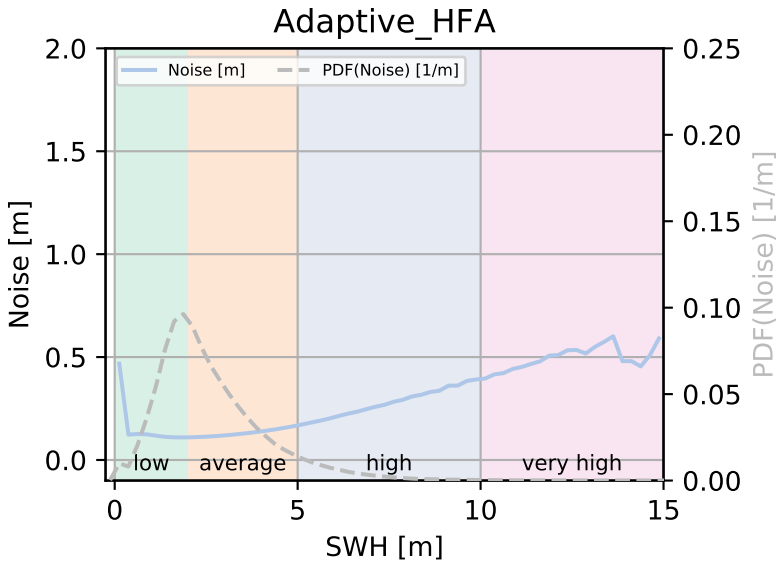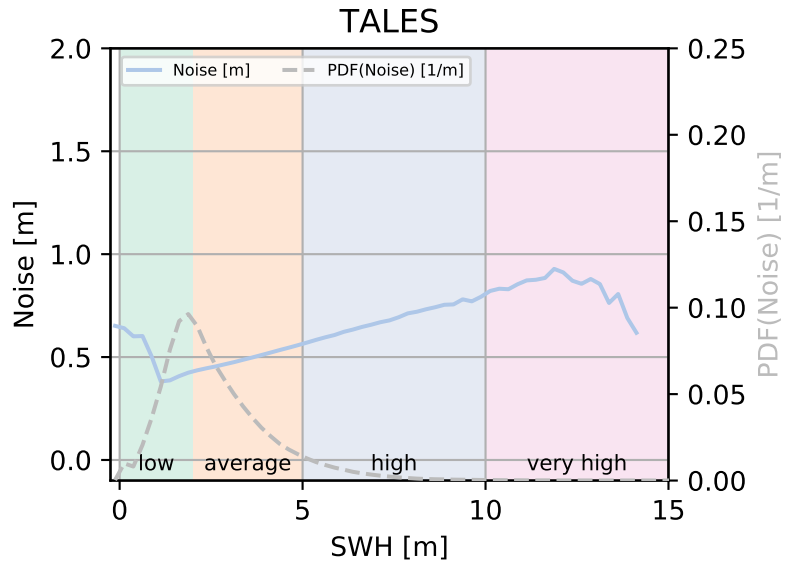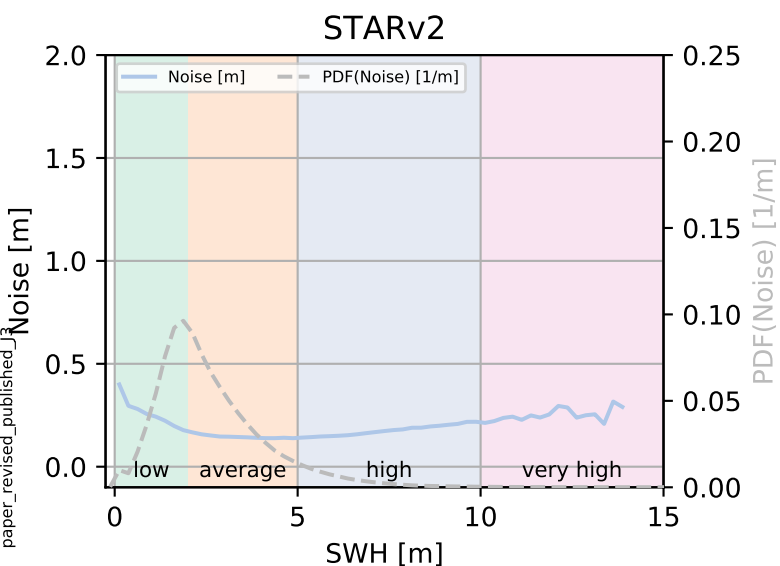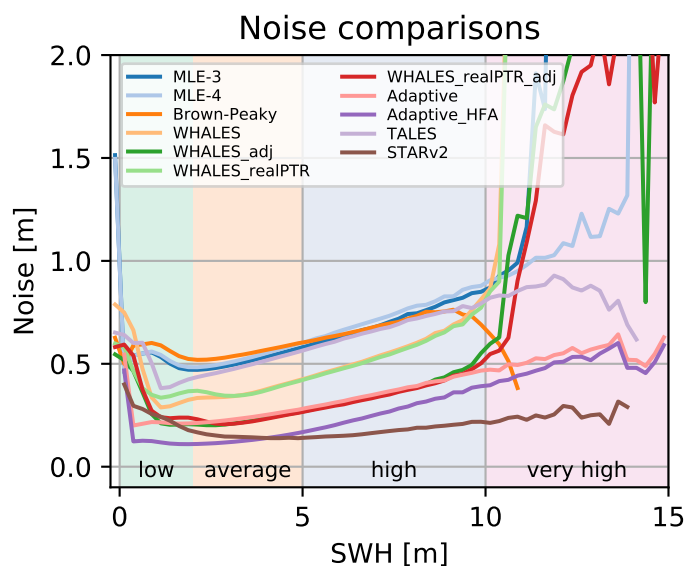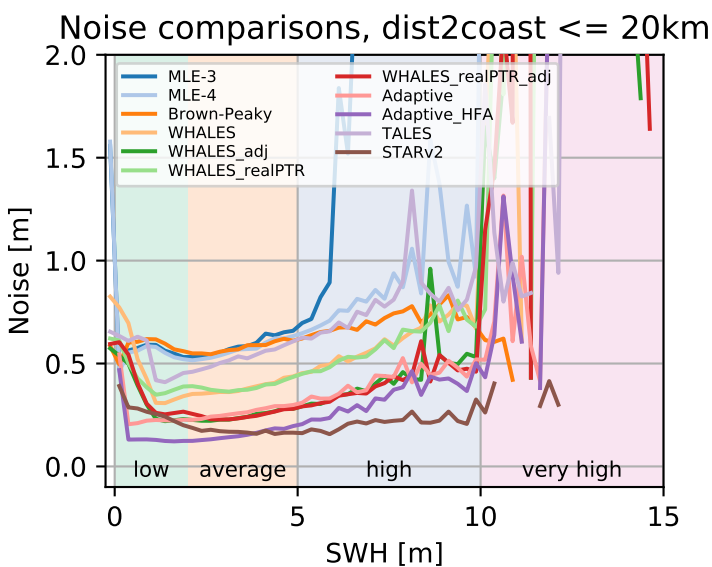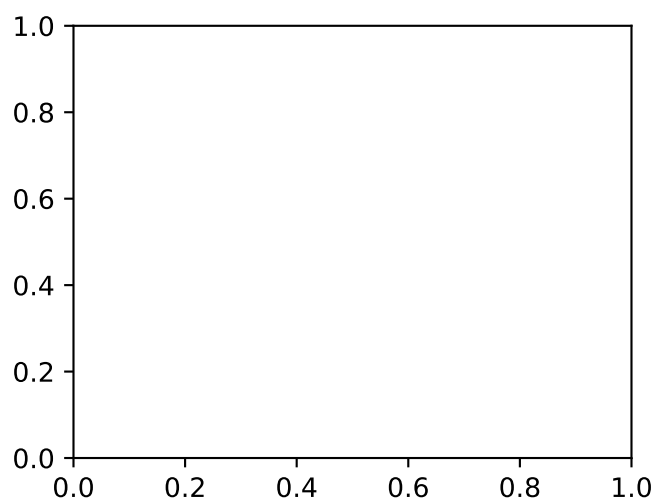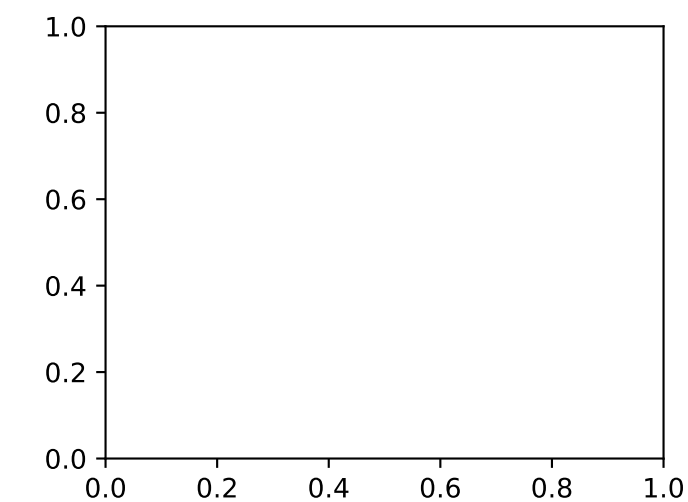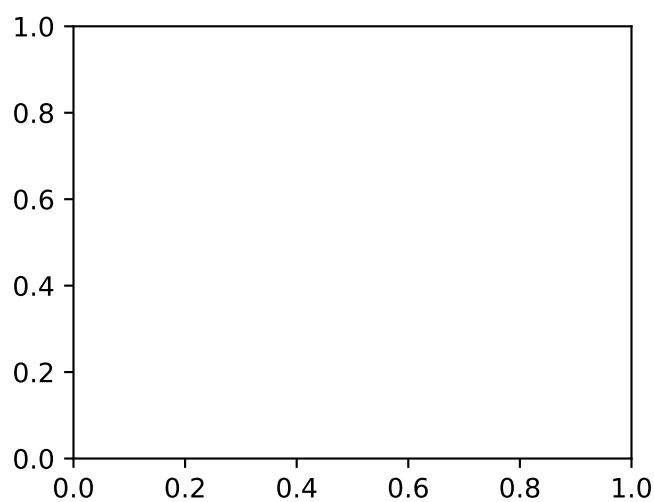

SWH m

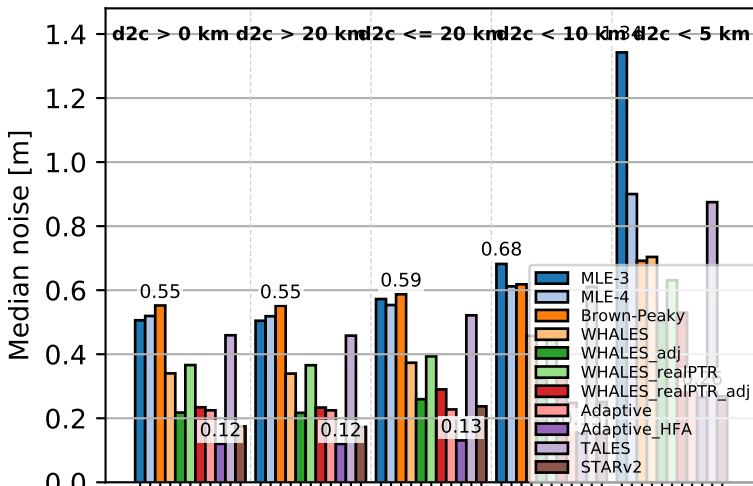

lowsea 0 &lt; SWH &lt; 2 m

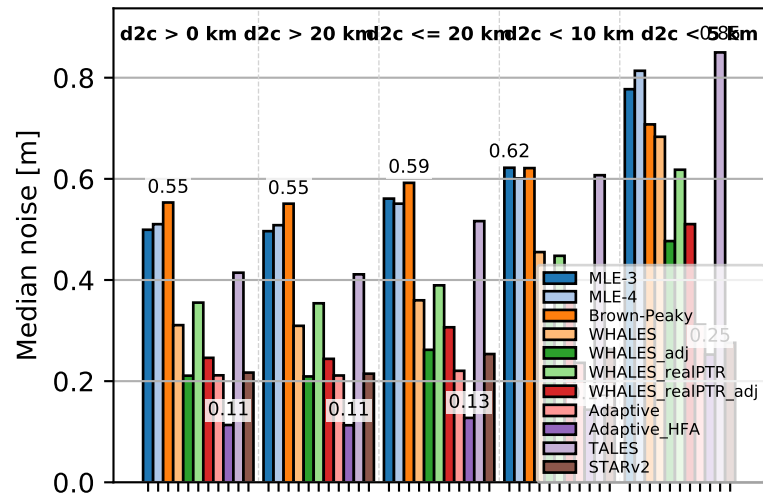

avgsea 2 &lt; SWH &lt; 5 m

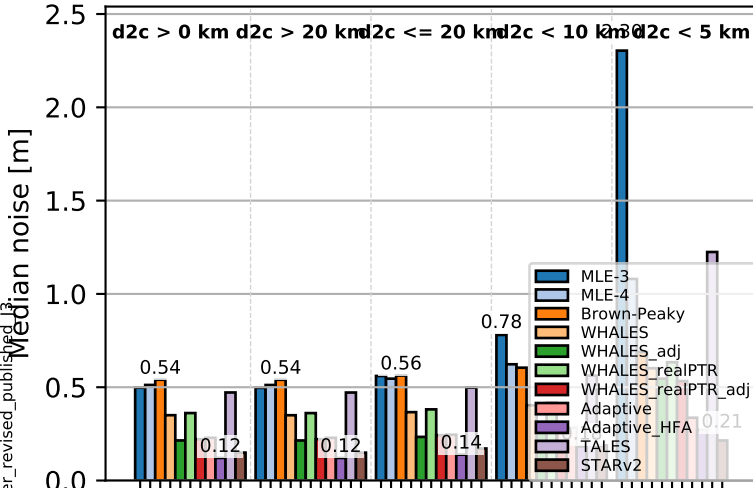

highsea SWH &gt; 5 m

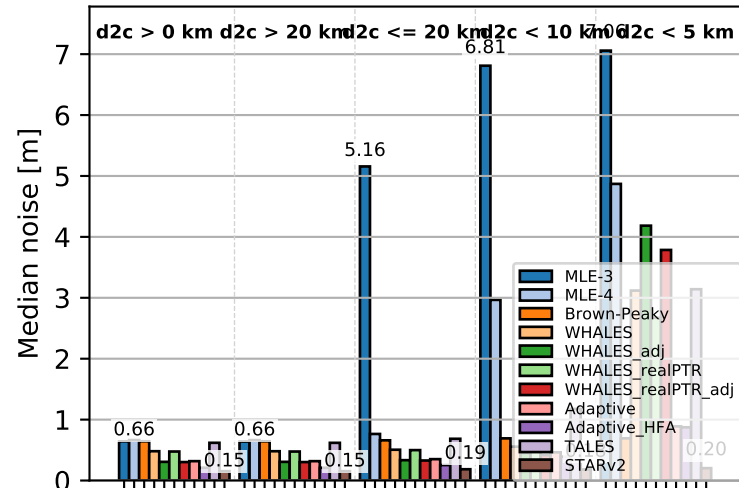

veryhighsea SWH &gt; 10 m

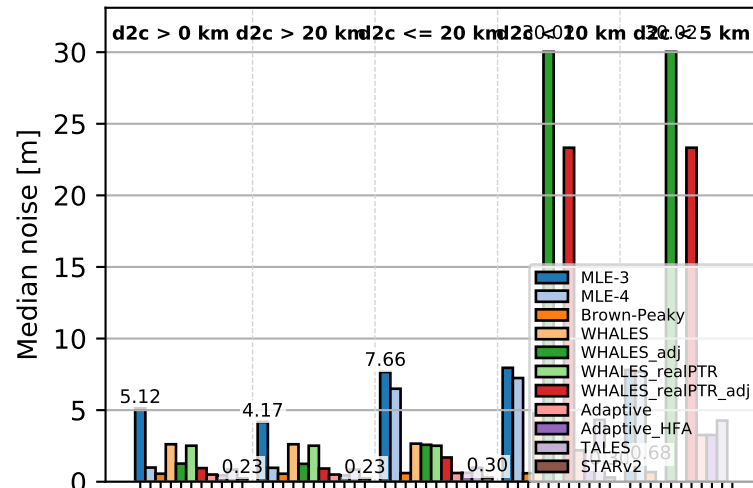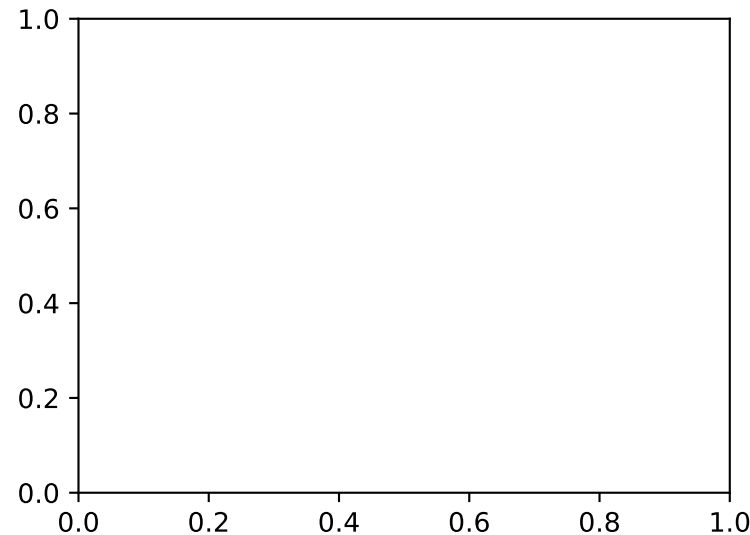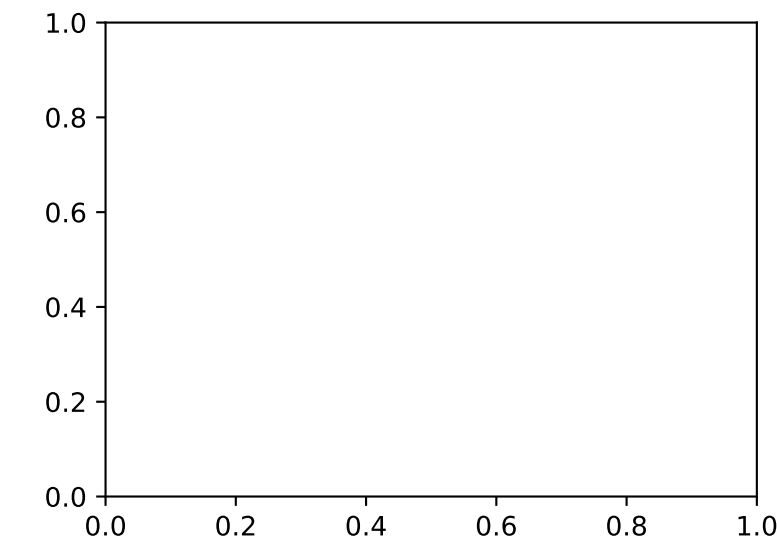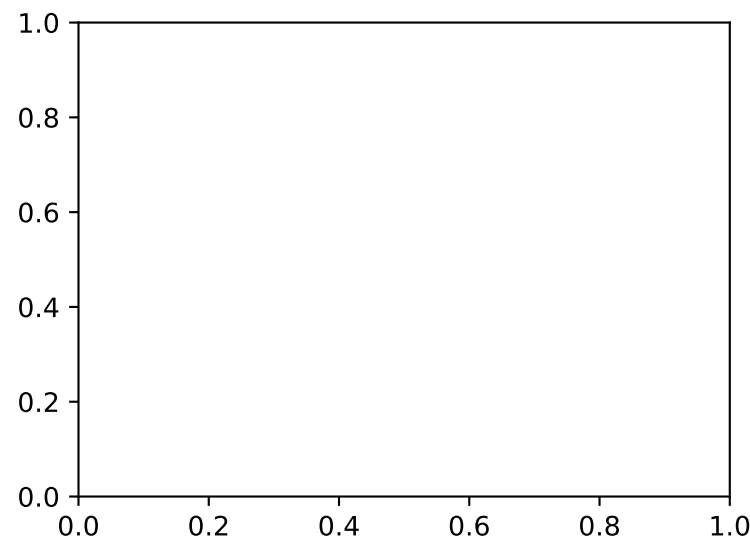

entries (ERA5-h): dist2coast

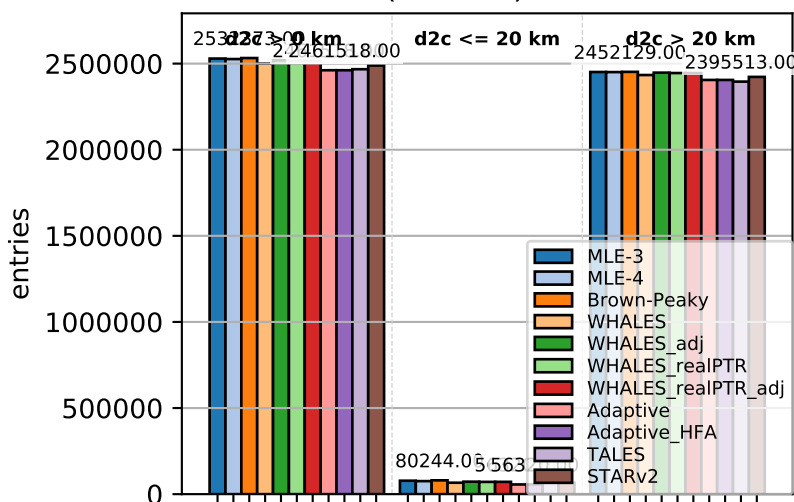

entries (ERA5-h): dist2coast

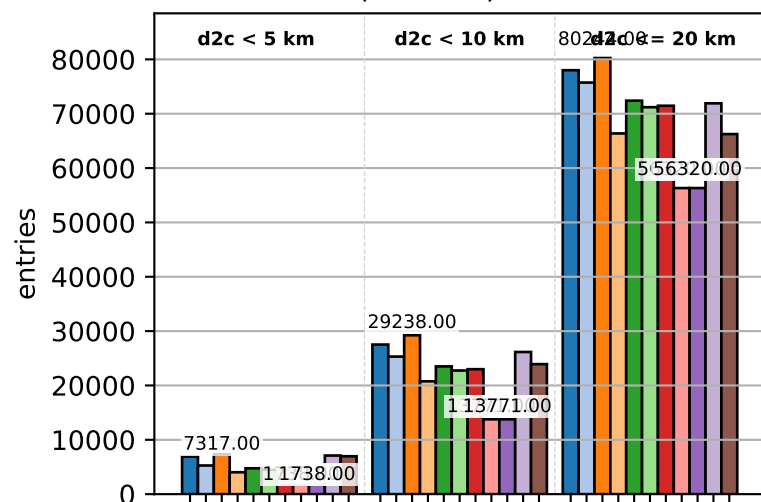

slope (ERA5-h): dist2coast

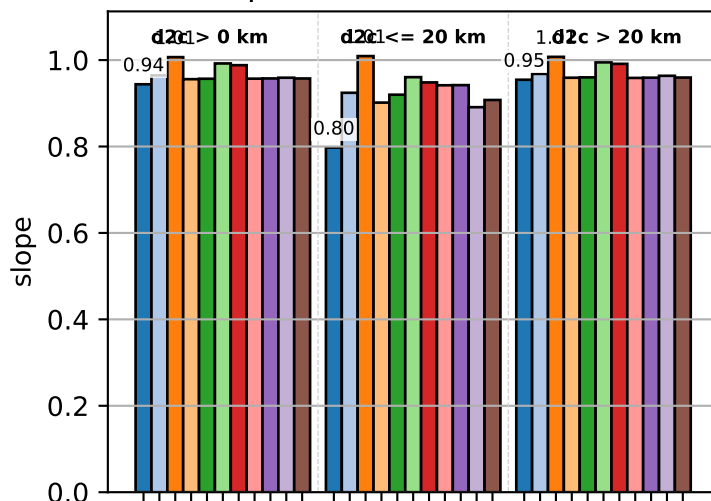

slope (ERA5-h): dist2coast

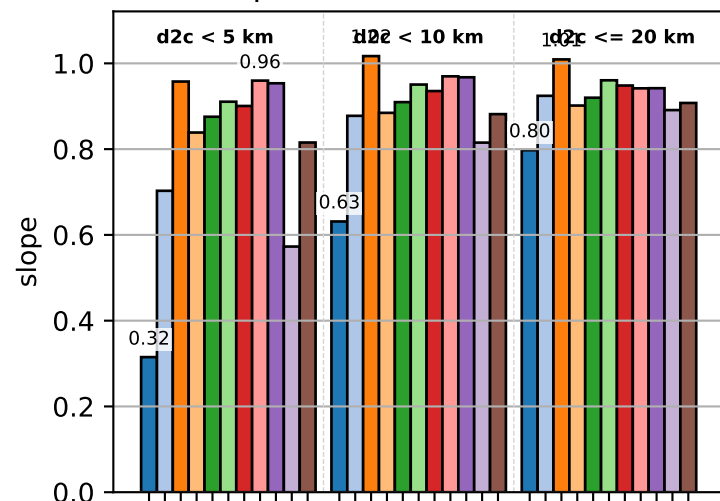

intercept (ERA5-h): dist2coast

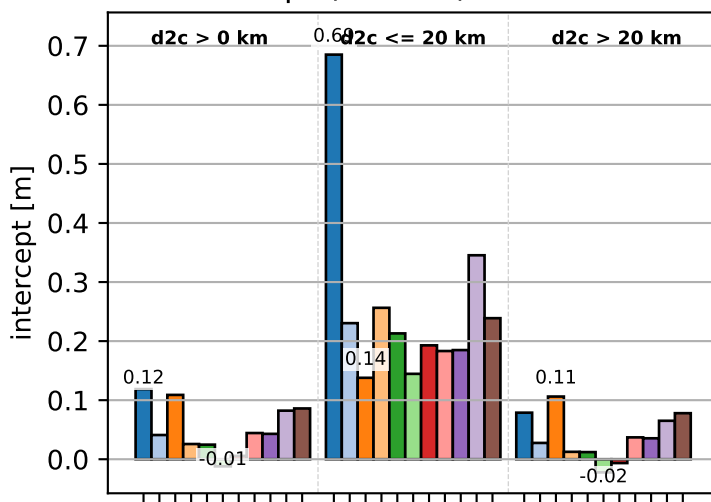

intercept (ERA5-h): dist2coast

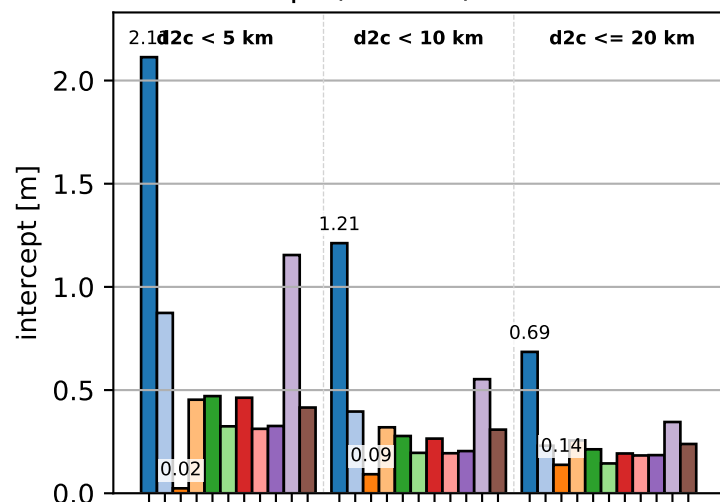

correlation (ERA5-h): dist2coast

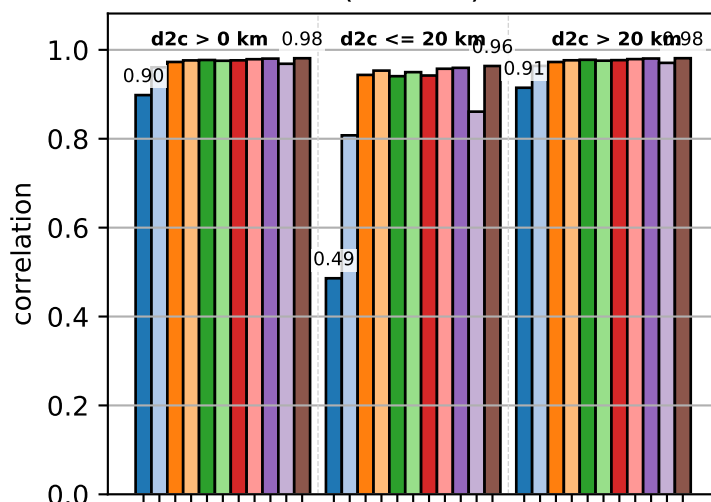

correlation (ERA5-h): dist2coast

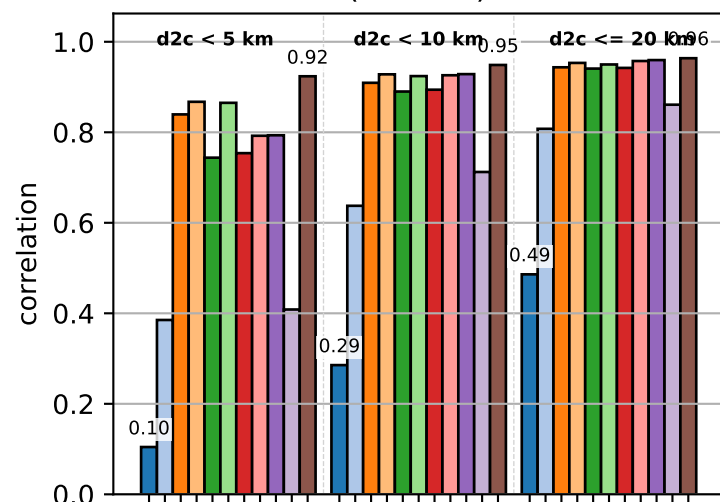

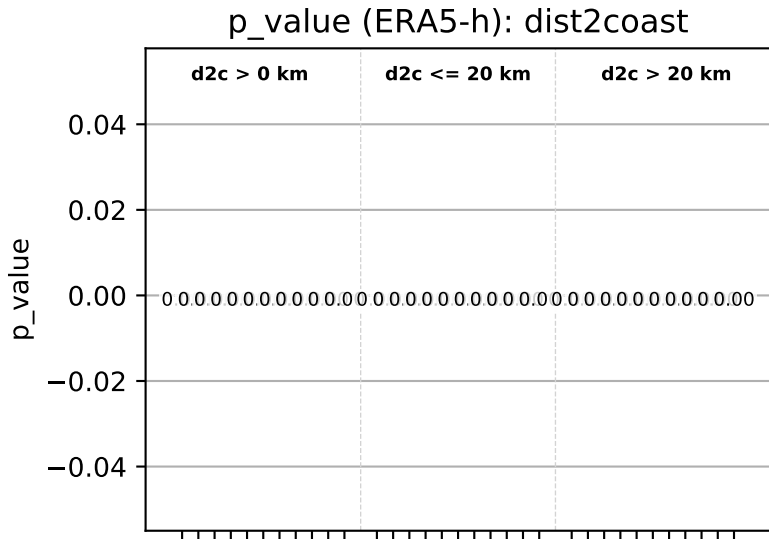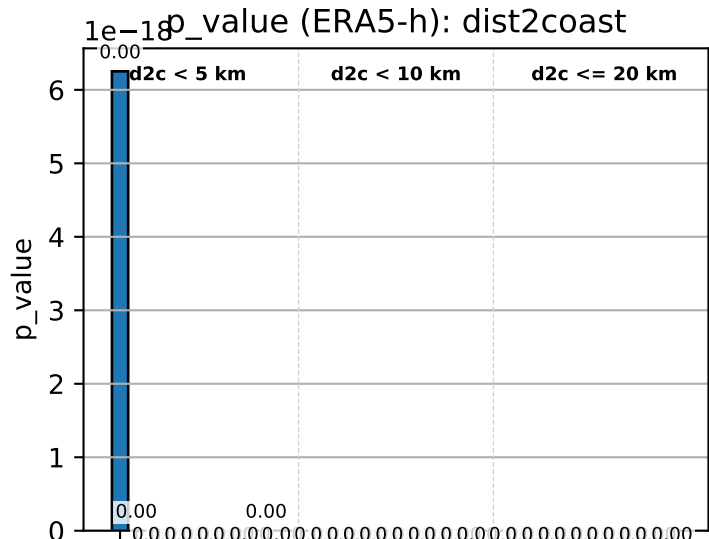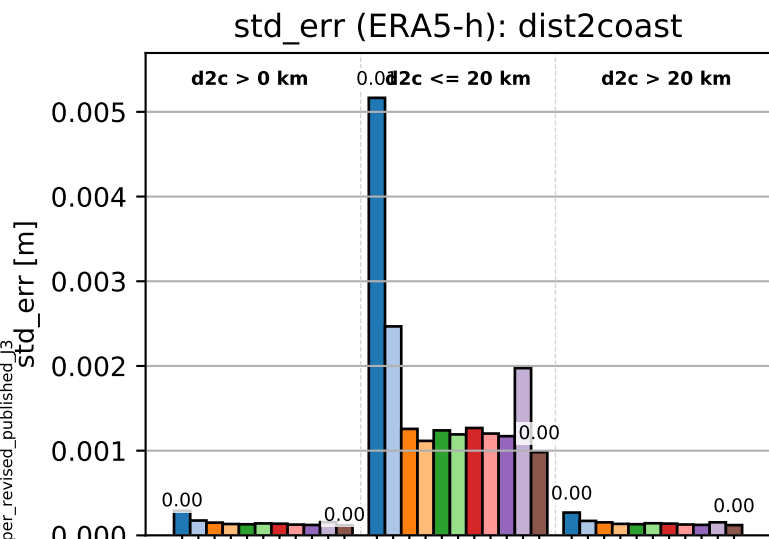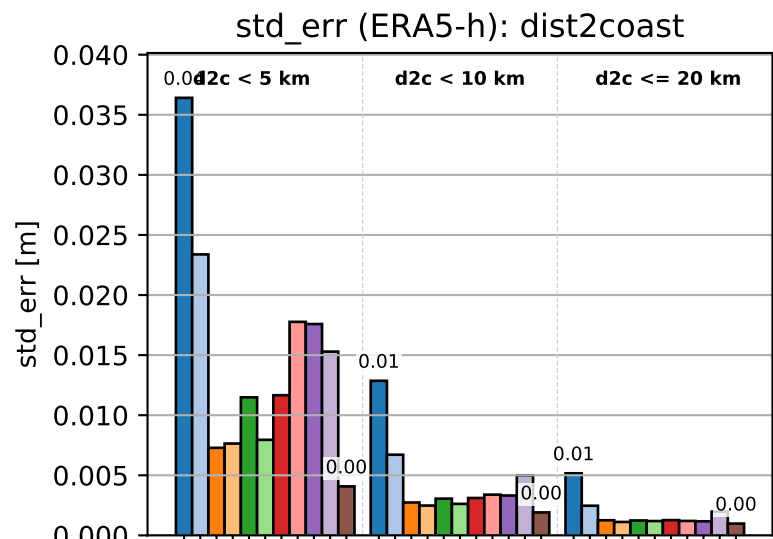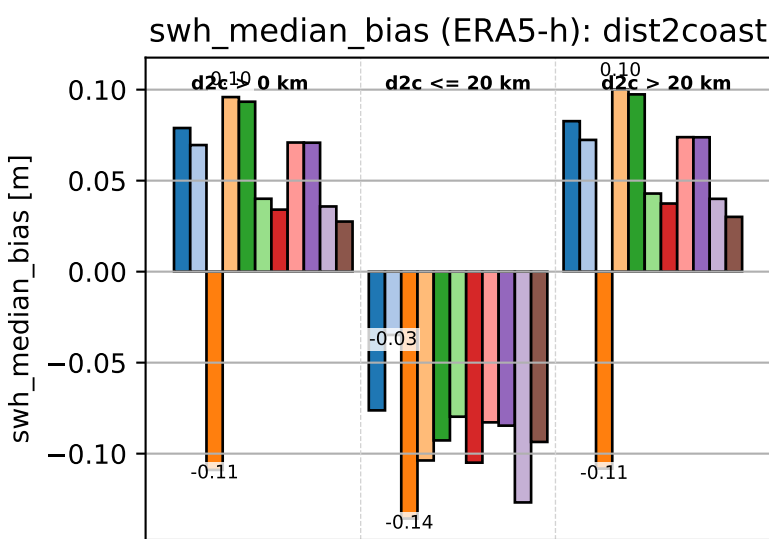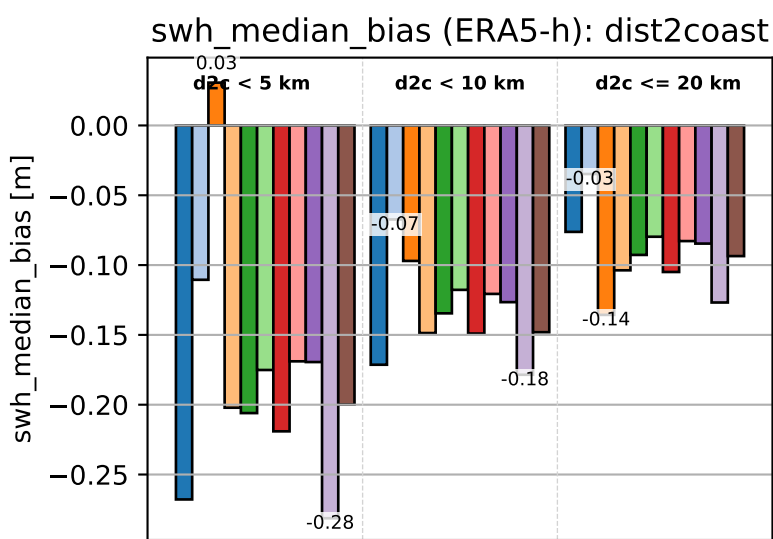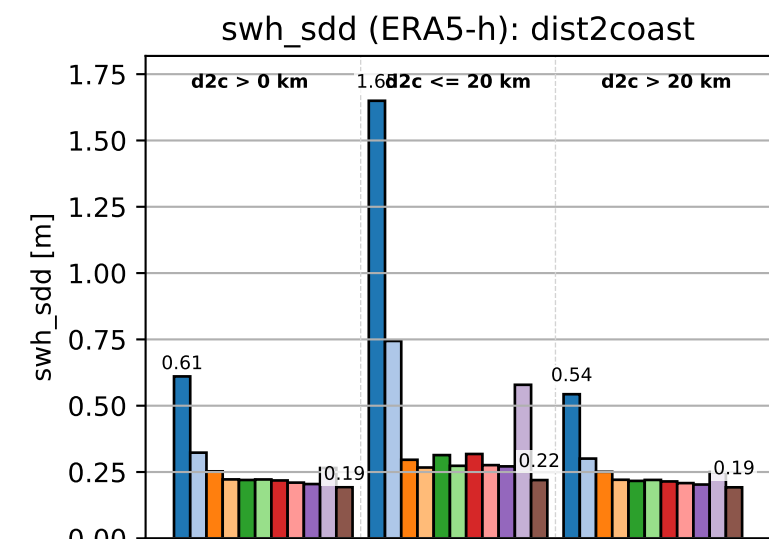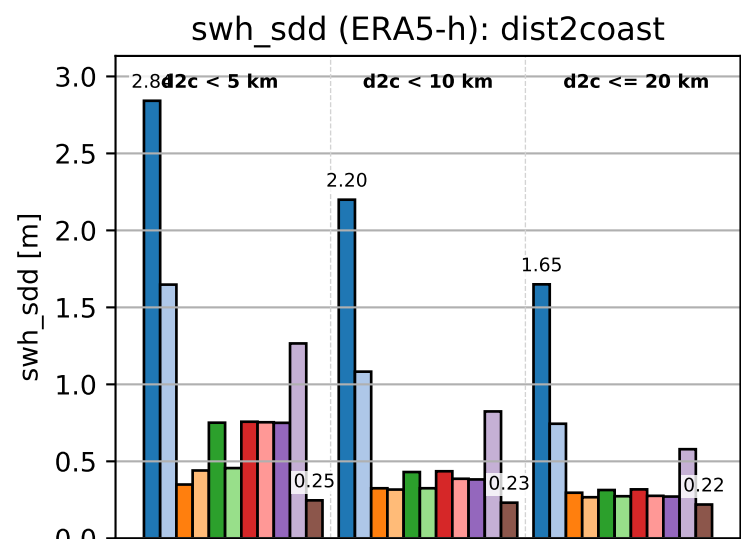

entries (ERA5-h): SWH

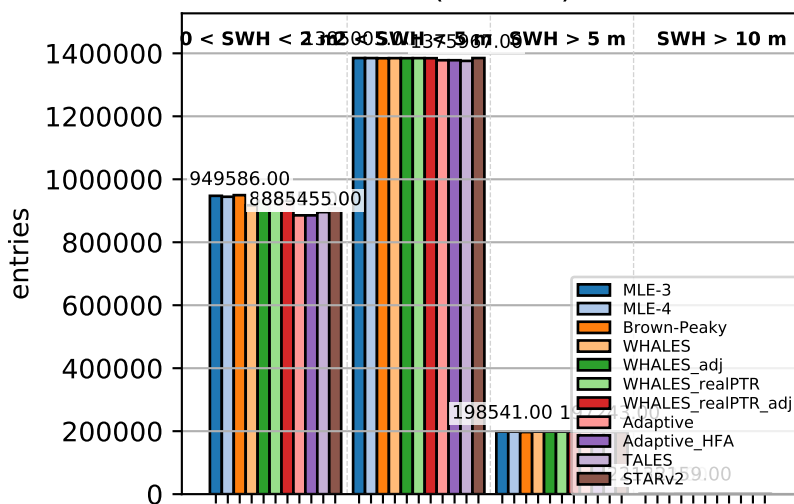

slope (ERA5-h): SWH

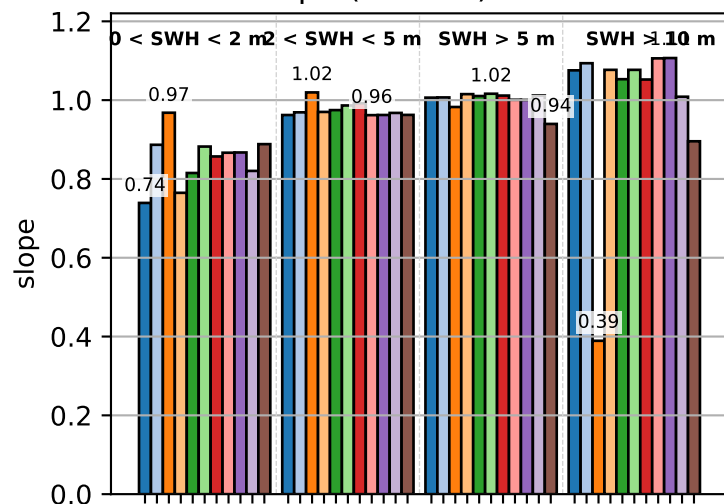

intercept (ERA5-h): SWH

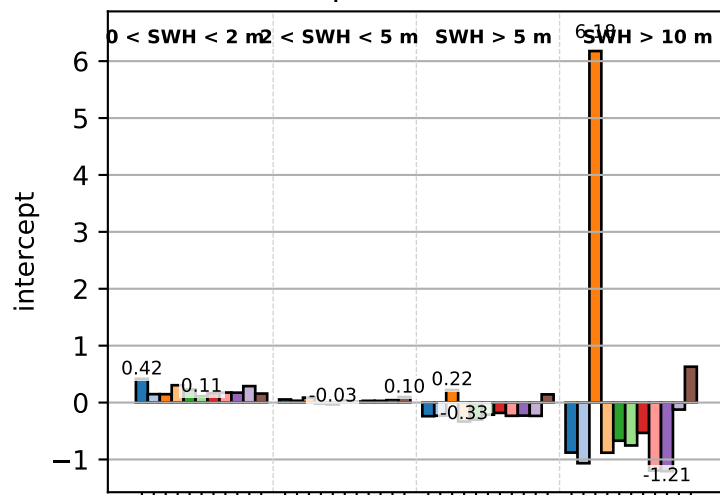

correlation (ERA5-h): SWH

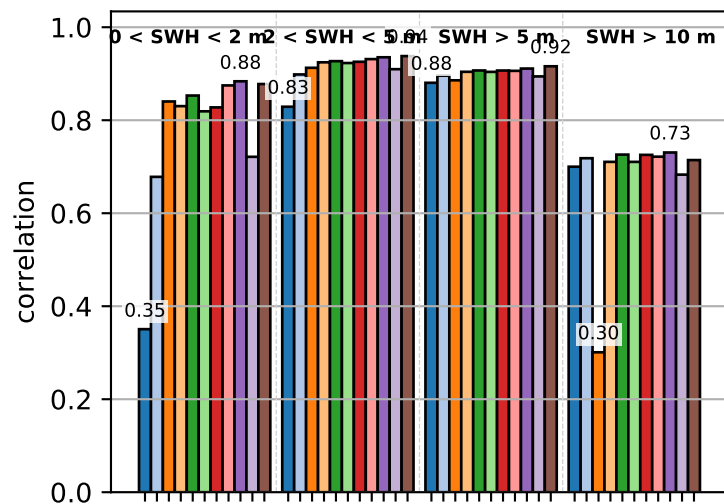

p\_value (ERA5-h): SWH

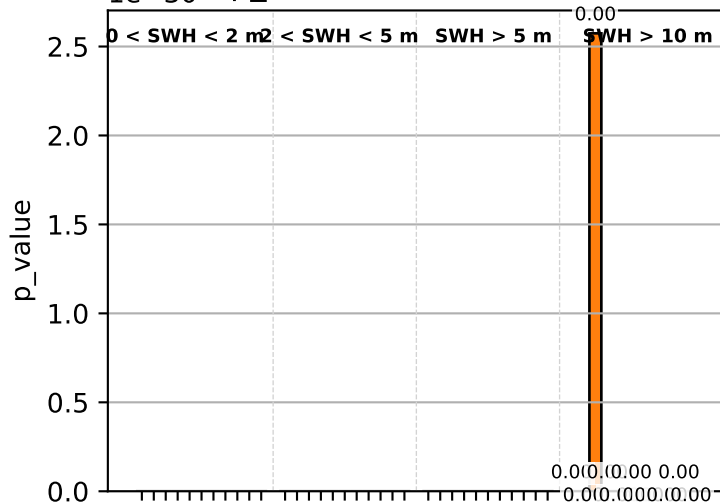

std\_err (ERA5-h): SWH

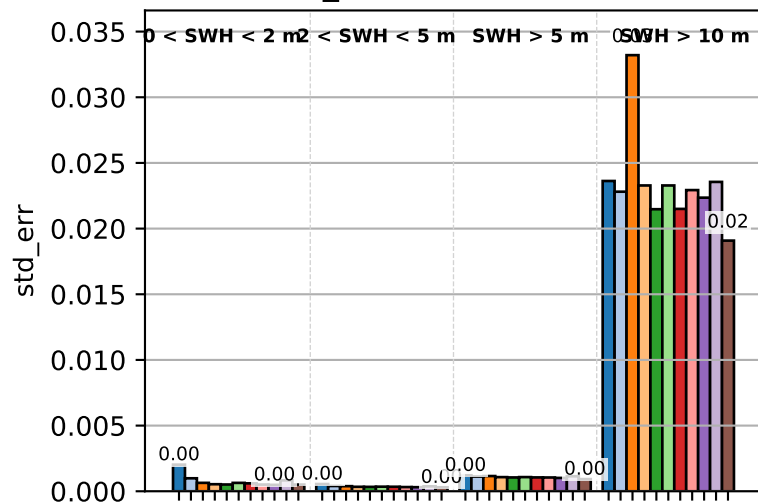

swh\_median\_bias (ERA5-h): SWH

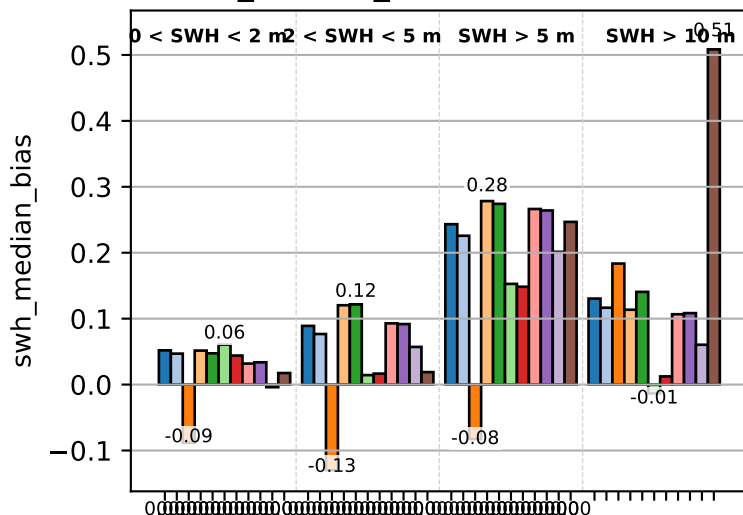

swh\_sdd (ERA5-h): SWH

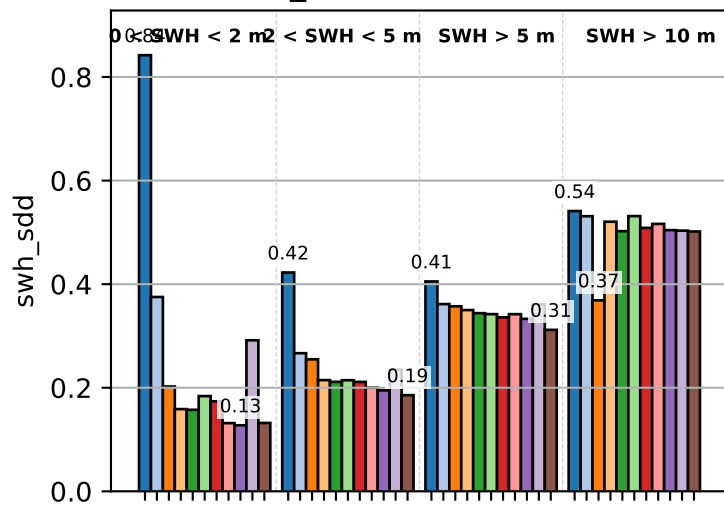

MLE-3 (j3) vs. ERA5-h: d2c &gt; 0 km

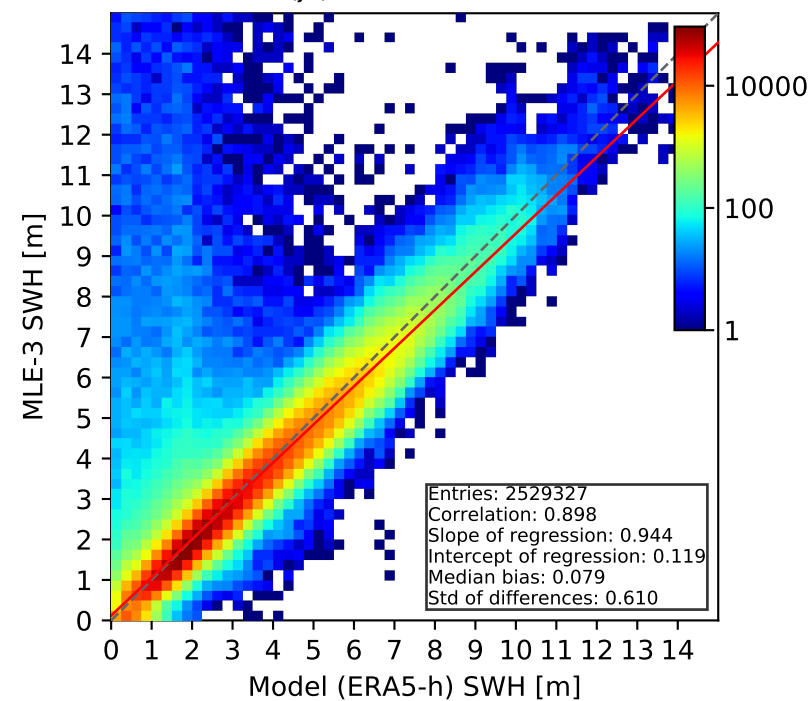

MLE-3 (j3) vs. ERA5-h: d2c &lt; 5 km

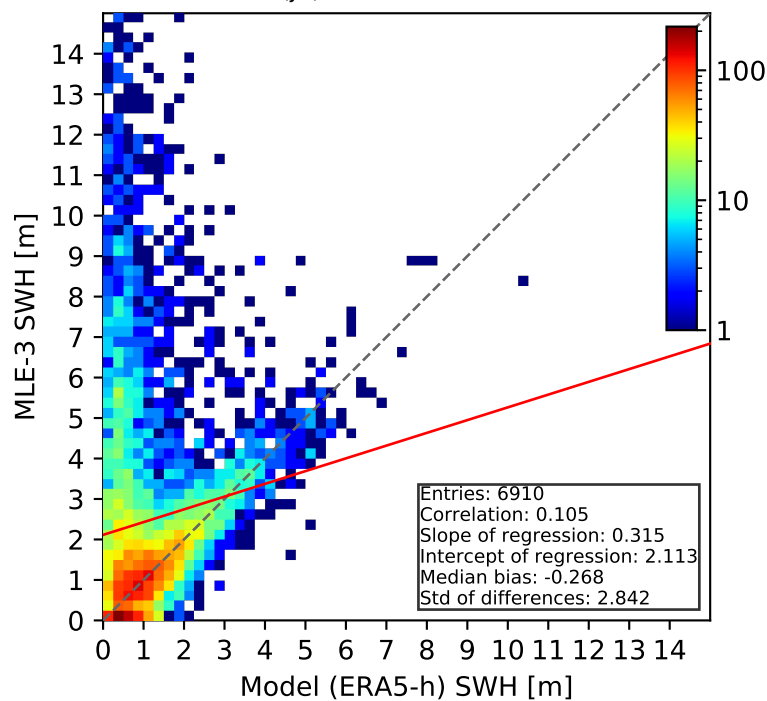

MLE-3 (j3) vs. ERA5-h: d2c &lt; 10 km

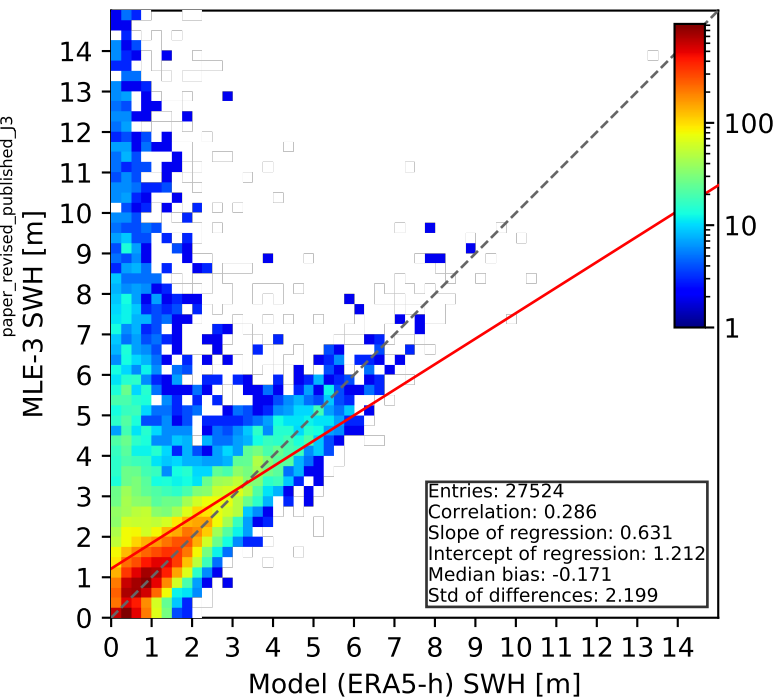

MLE-3 (j3) vs. ERA5-h: d2c &lt;= 20 km

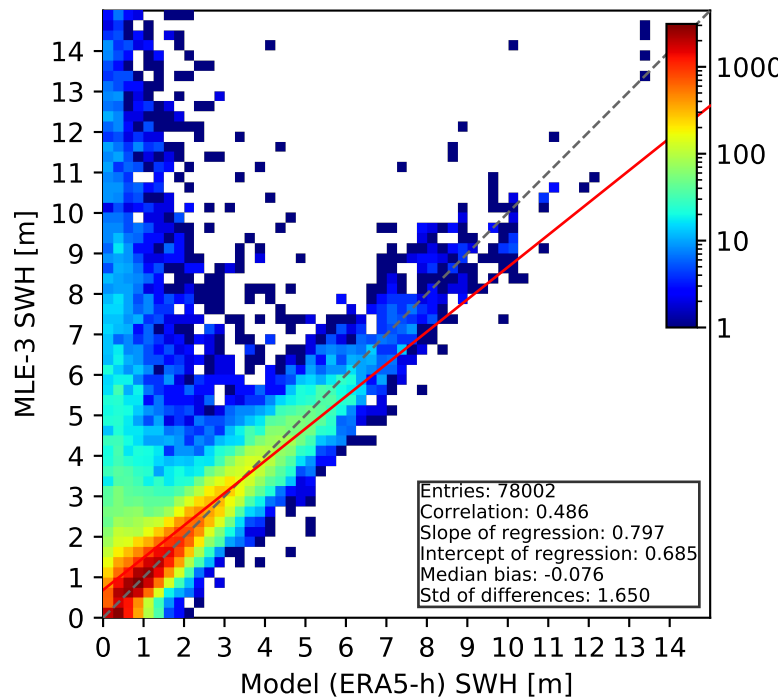

MLE-3 (j3) vs. ERA5-h: d2c &gt; 20 km

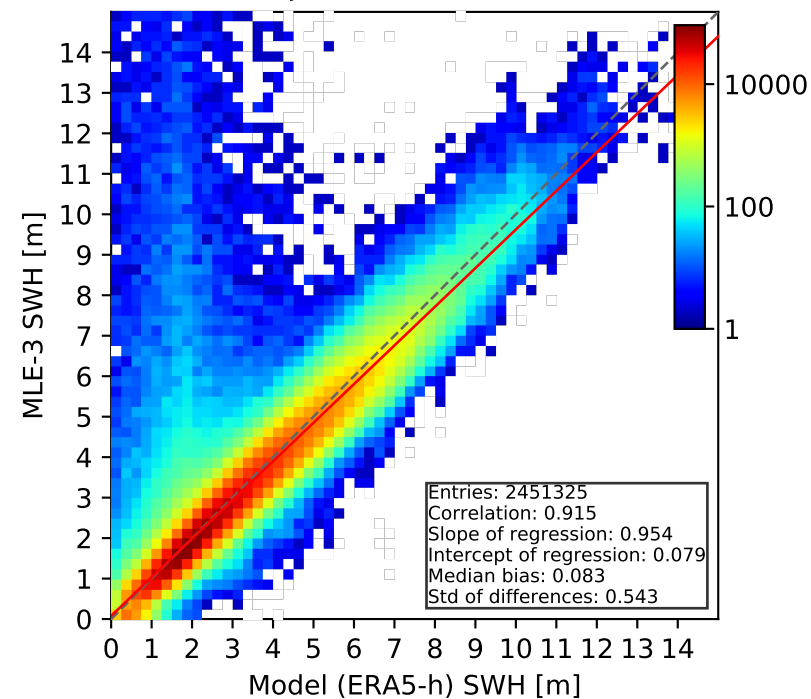

MLE-3 (j3) vs. ERA5-h: 0 &lt; SWH &lt; 2 m

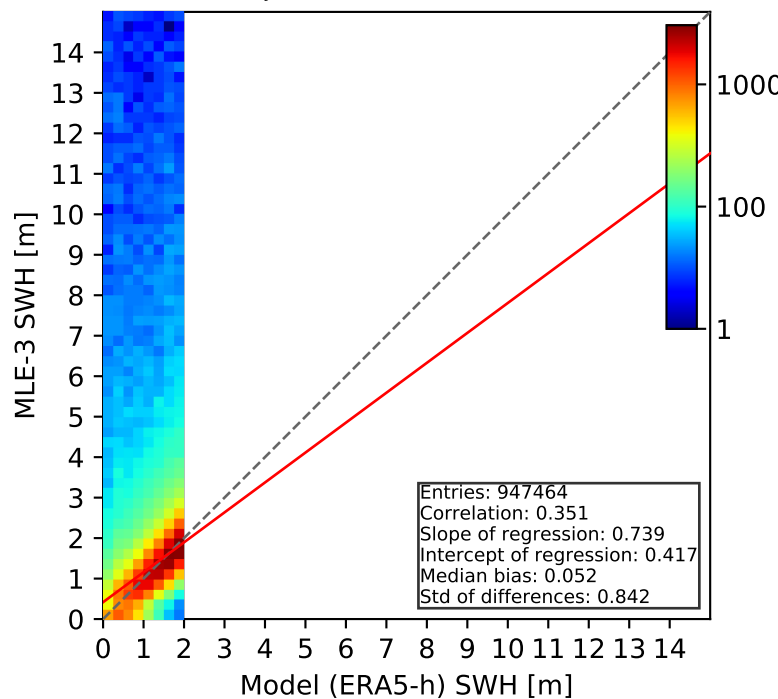

MLE-3 (j3) vs. ERA5-h:  $2 < \text{SWH} < 5 \text{ m}$ 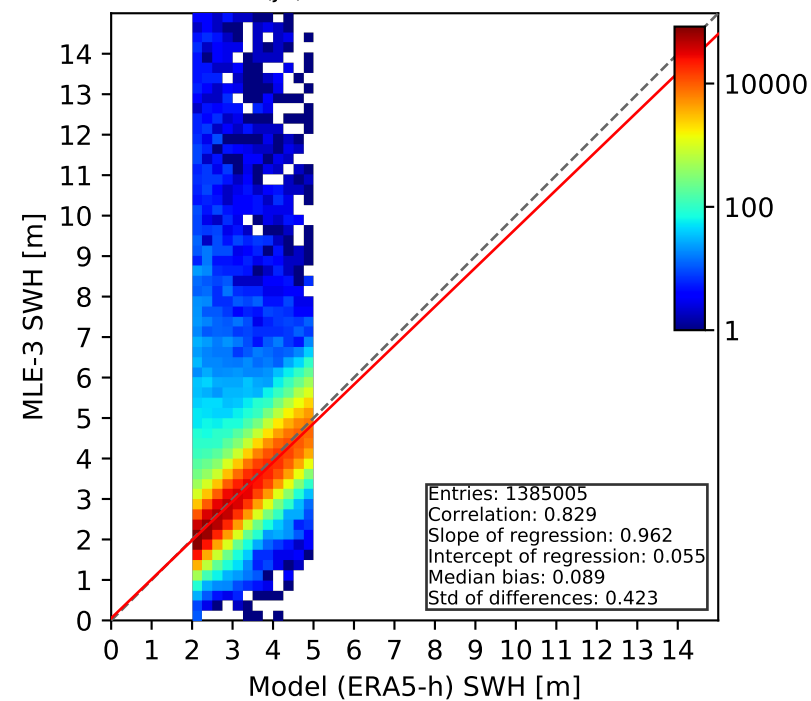MLE-3 (j3) vs. ERA5-h:  $\text{SWH} > 5 \text{ m}$ 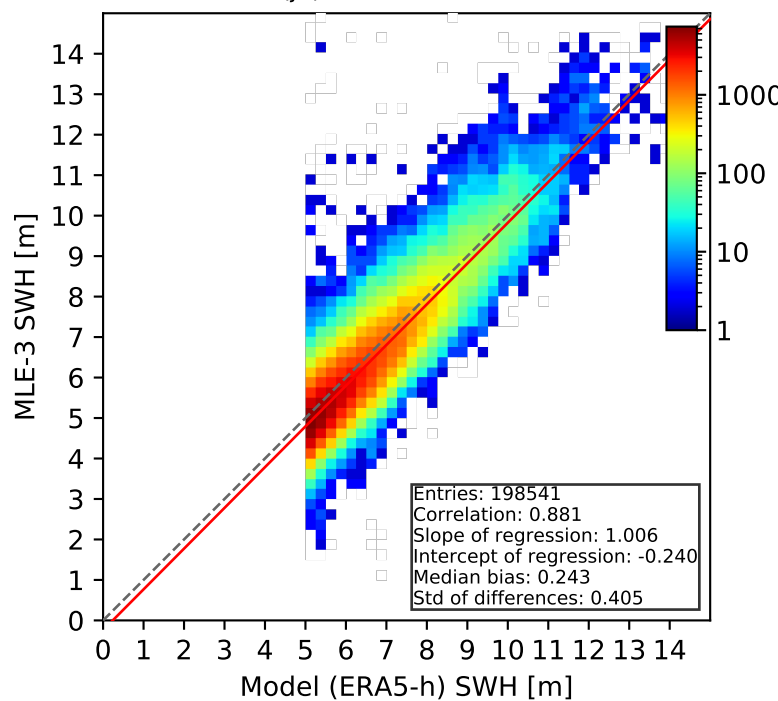MLE-3 (j3) vs. ERA5-h:  $\text{SWH} > 10 \text{ m}$ 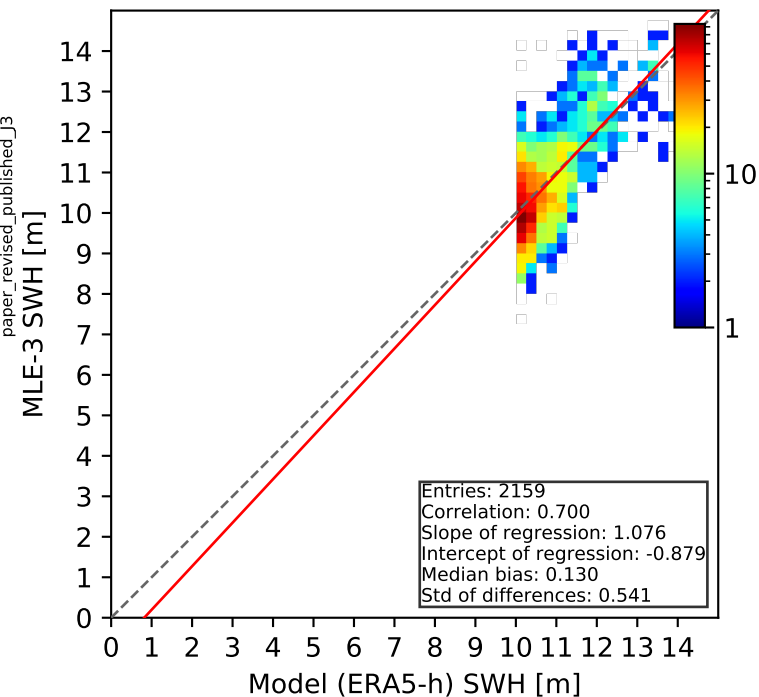MLE-4 (j3) vs. ERA5-h:  $\text{d2c} > 0 \text{ km}$ 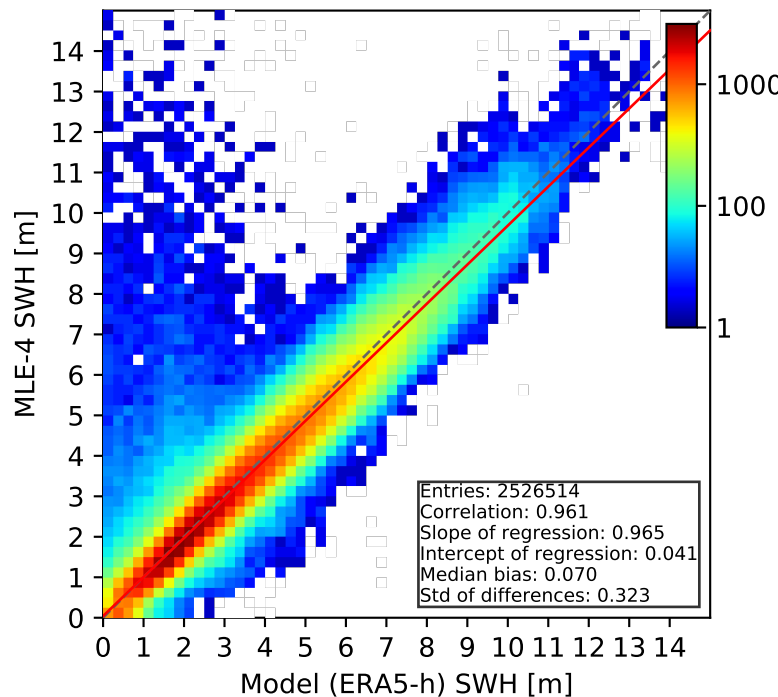MLE-4 (j3) vs. ERA5-h:  $\text{d2c} < 5 \text{ km}$ 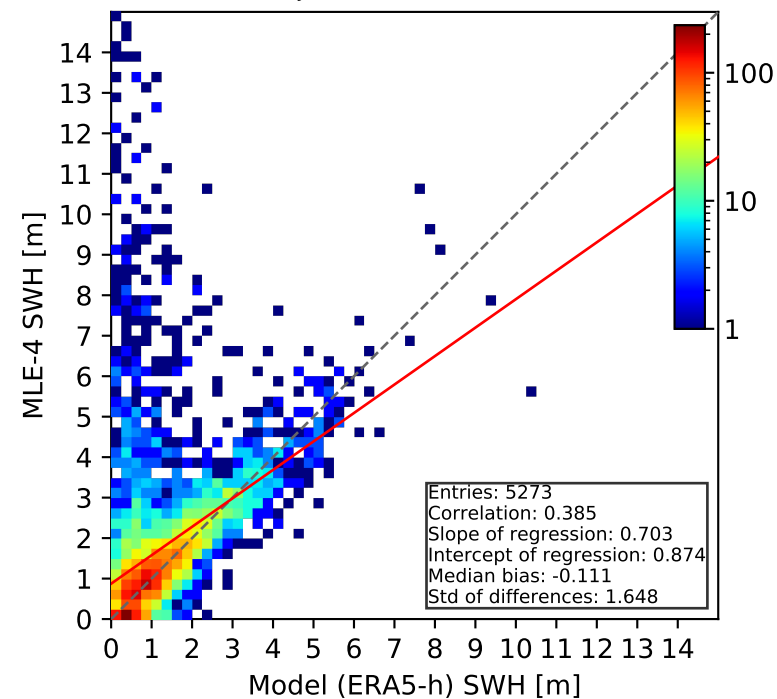MLE-4 (j3) vs. ERA5-h:  $\text{d2c} < 10 \text{ km}$ 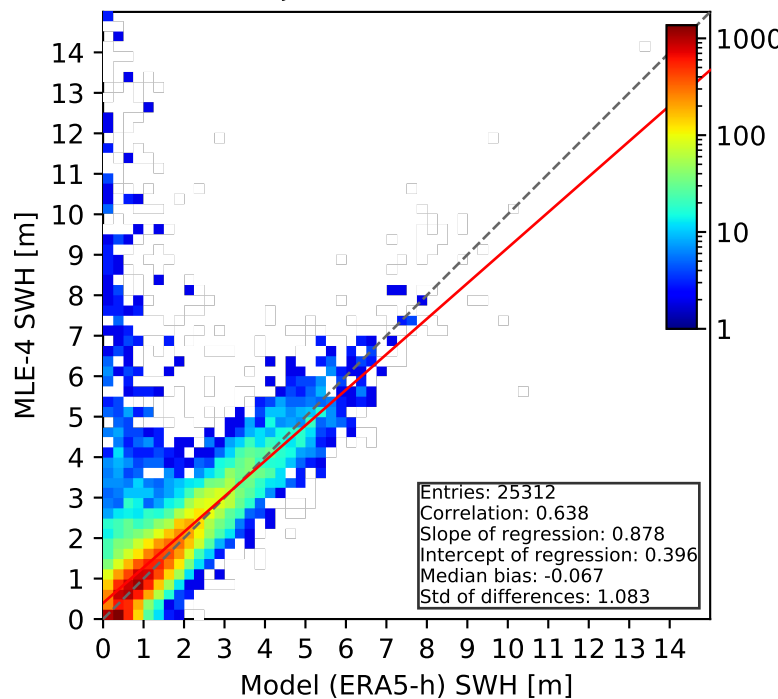

MLE-4 (j3) vs. ERA5-h: d2c &lt;= 20 km

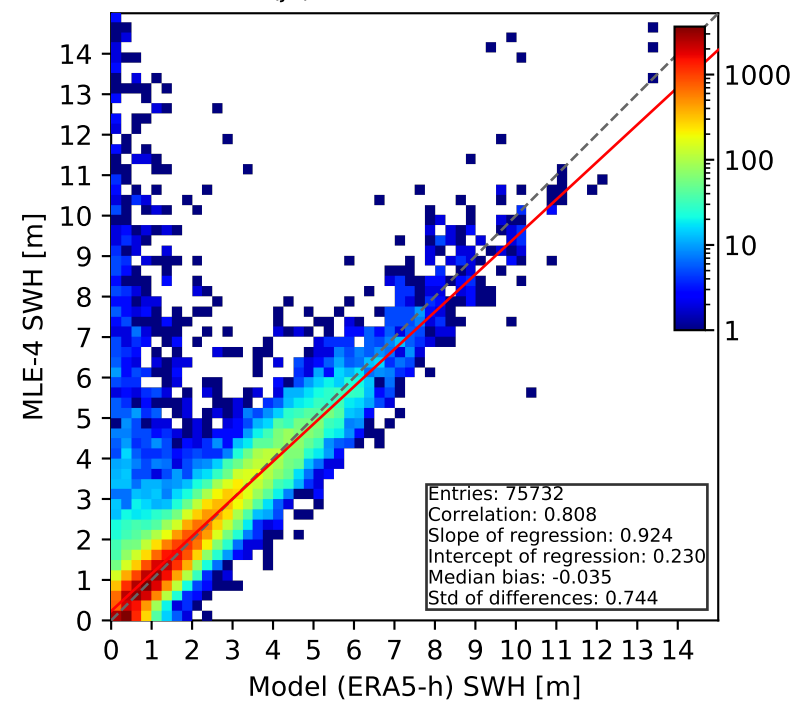

MLE-4 (j3) vs. ERA5-h: d2c &gt; 20 km

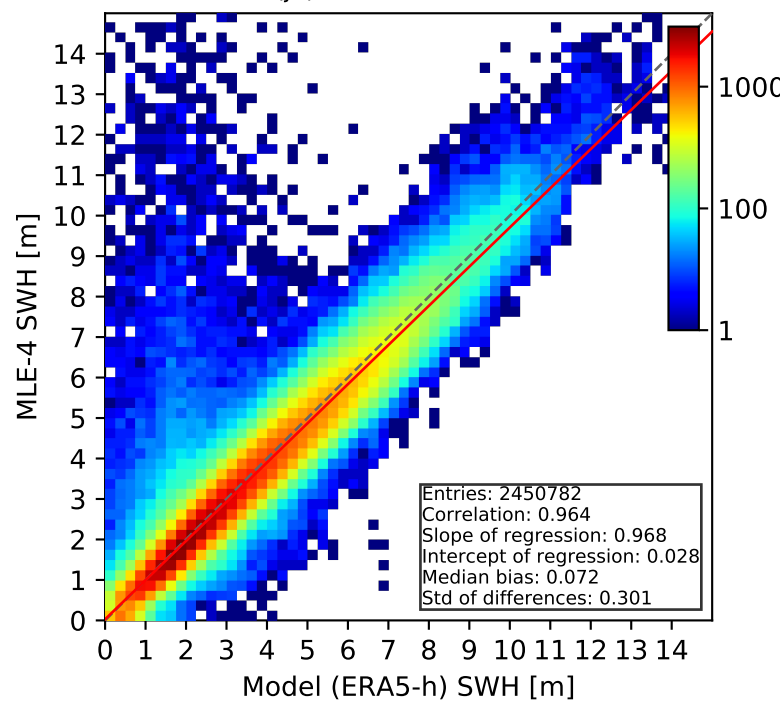

MLE-4 (j3) vs. ERA5-h: 0 &lt; SWH &lt; 2 m

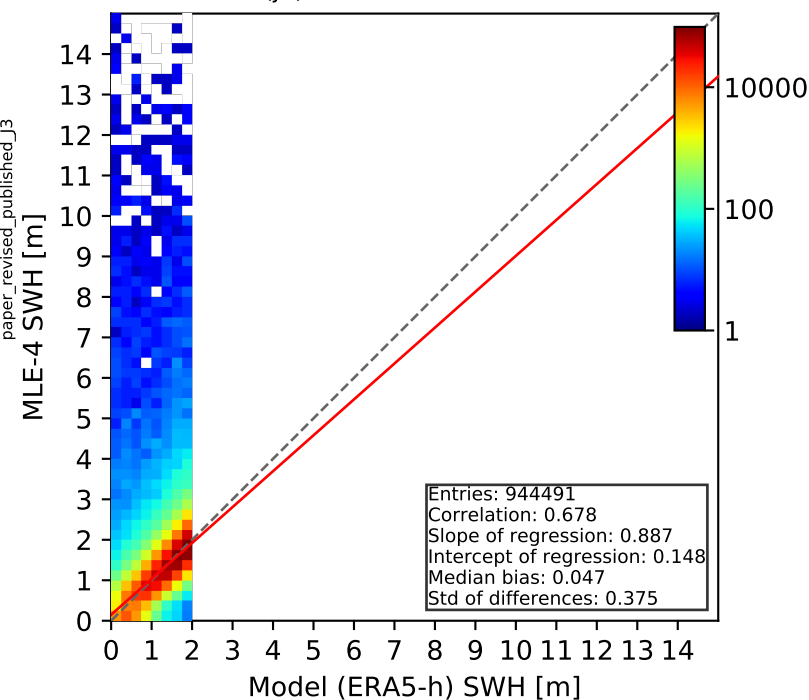

MLE-4 (j3) vs. ERA5-h: 2 &lt; SWH &lt; 5 m

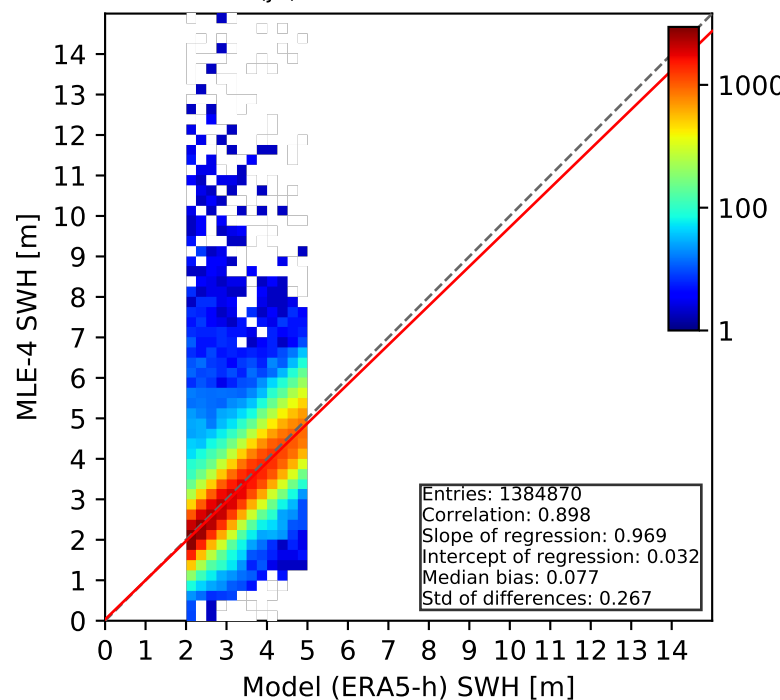

MLE-4 (j3) vs. ERA5-h: SWH &gt; 5 m

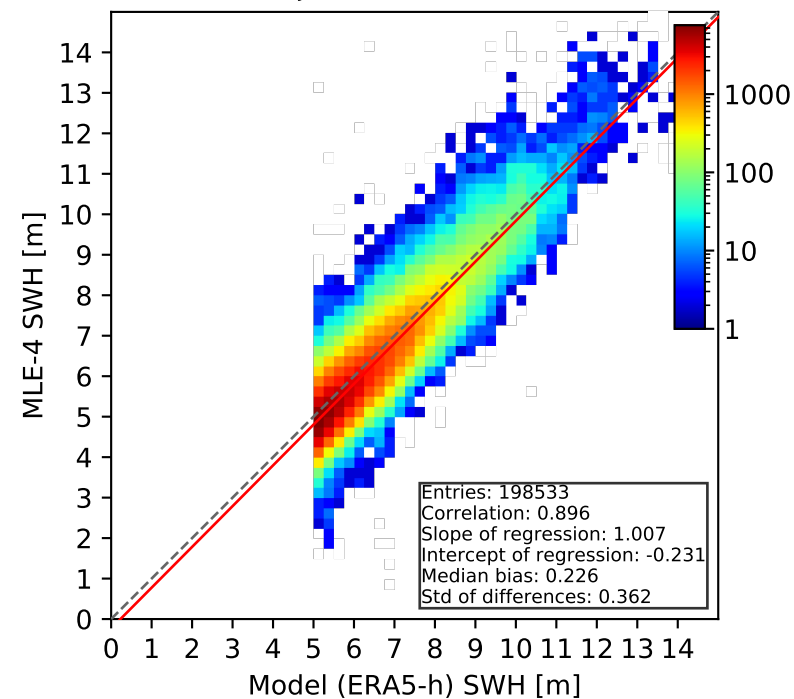

MLE-4 (j3) vs. ERA5-h: SWH &gt; 10 m

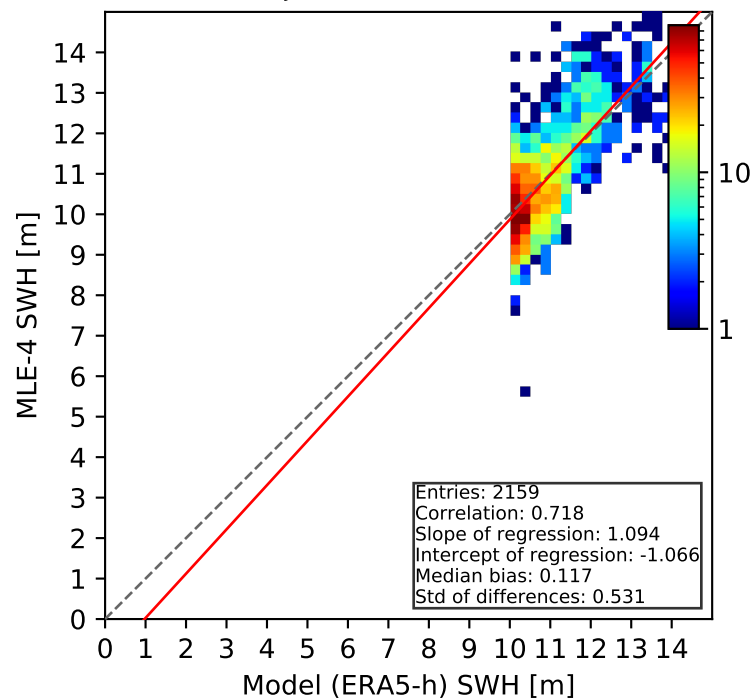

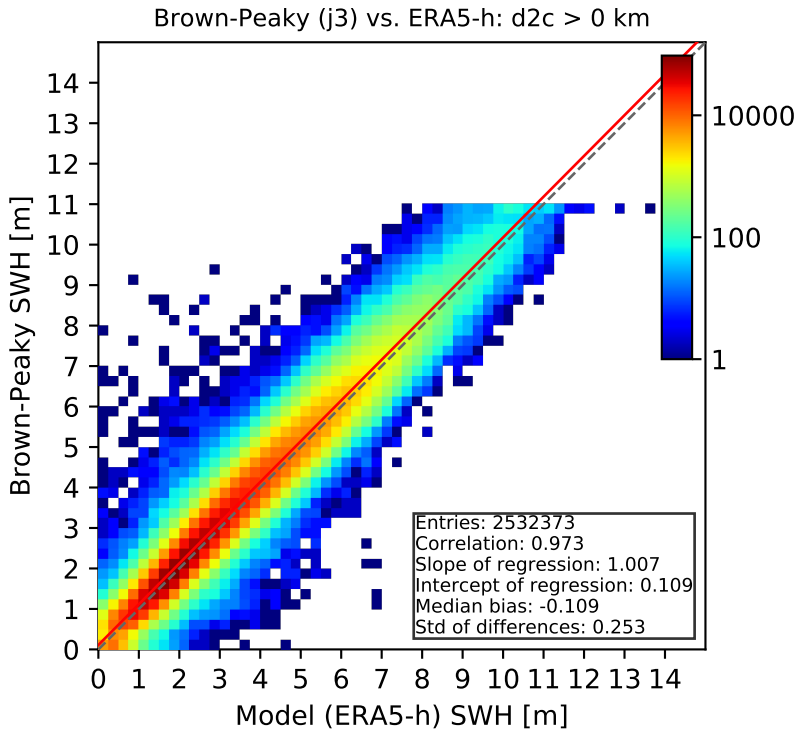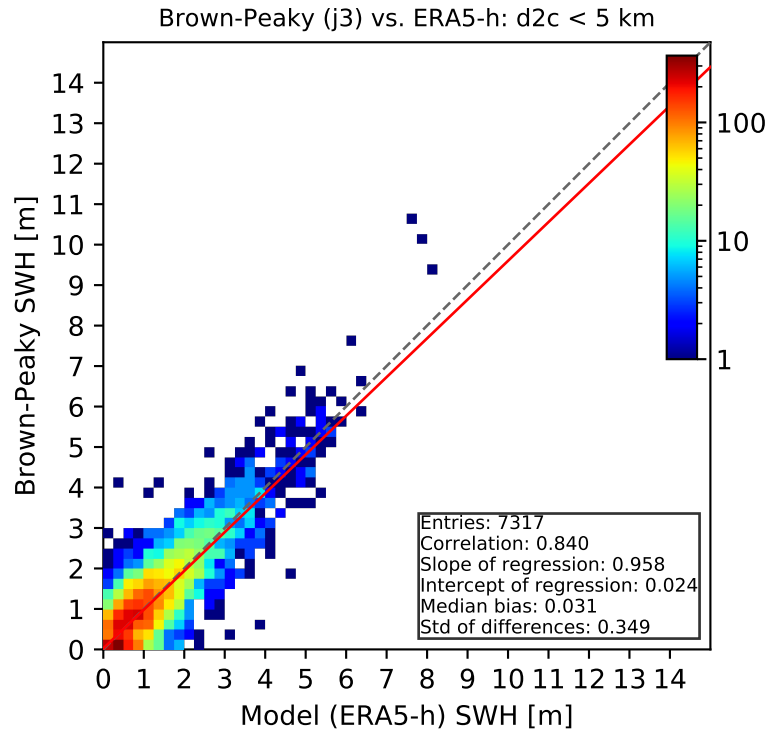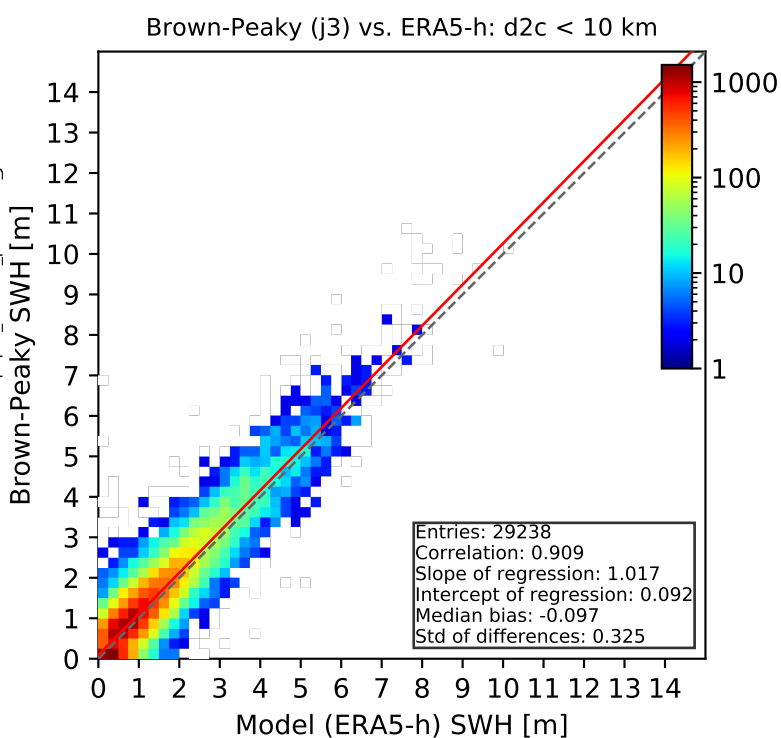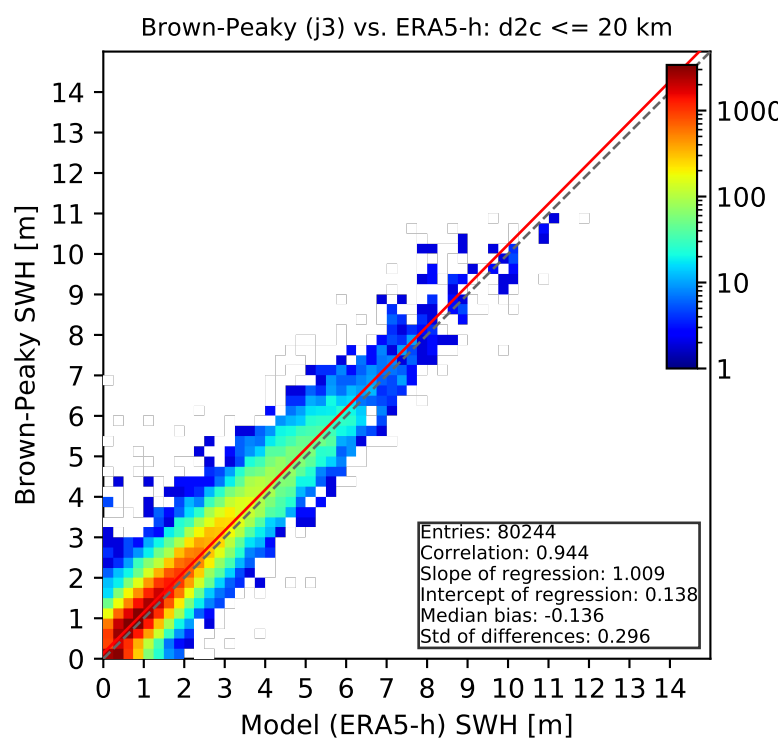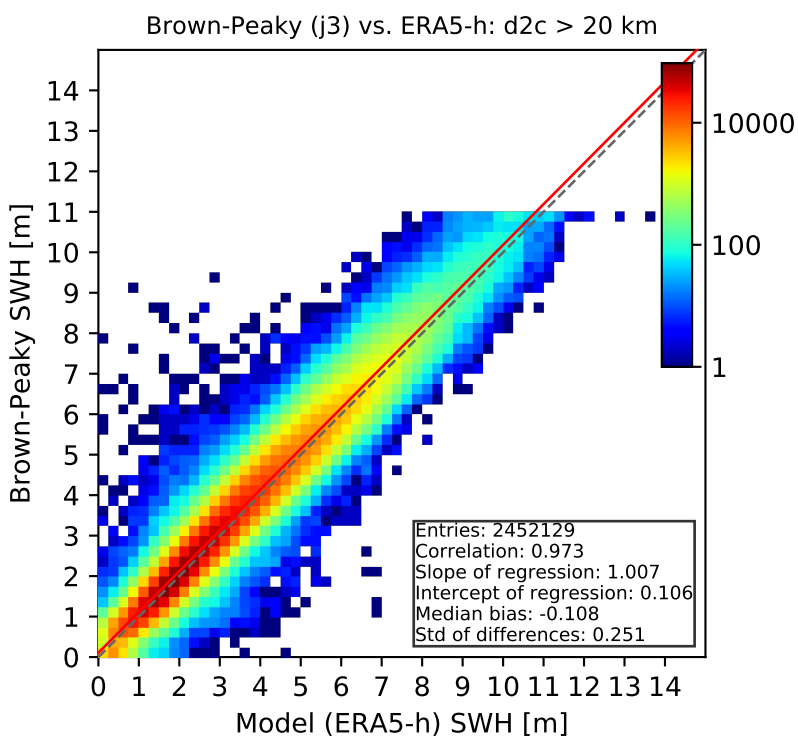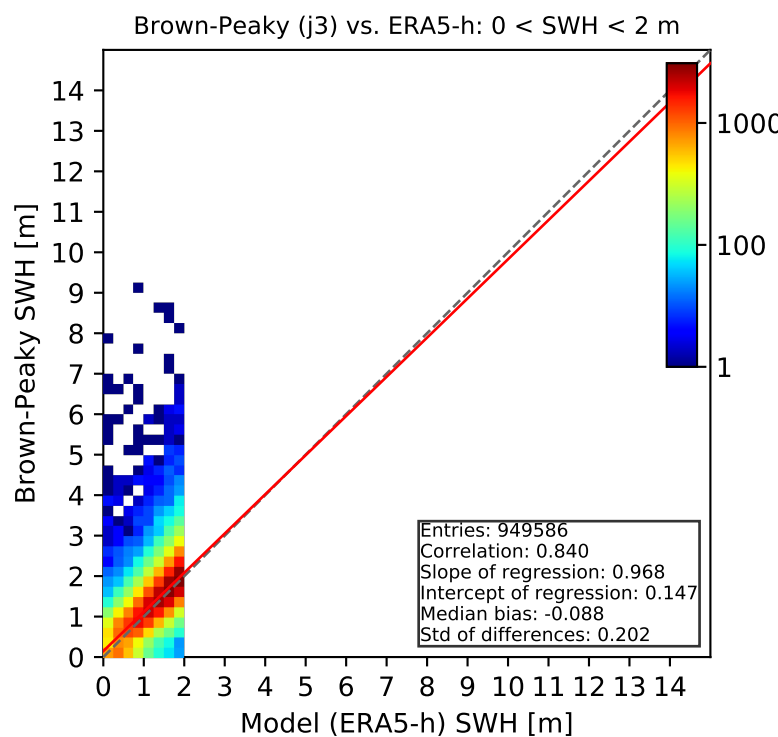

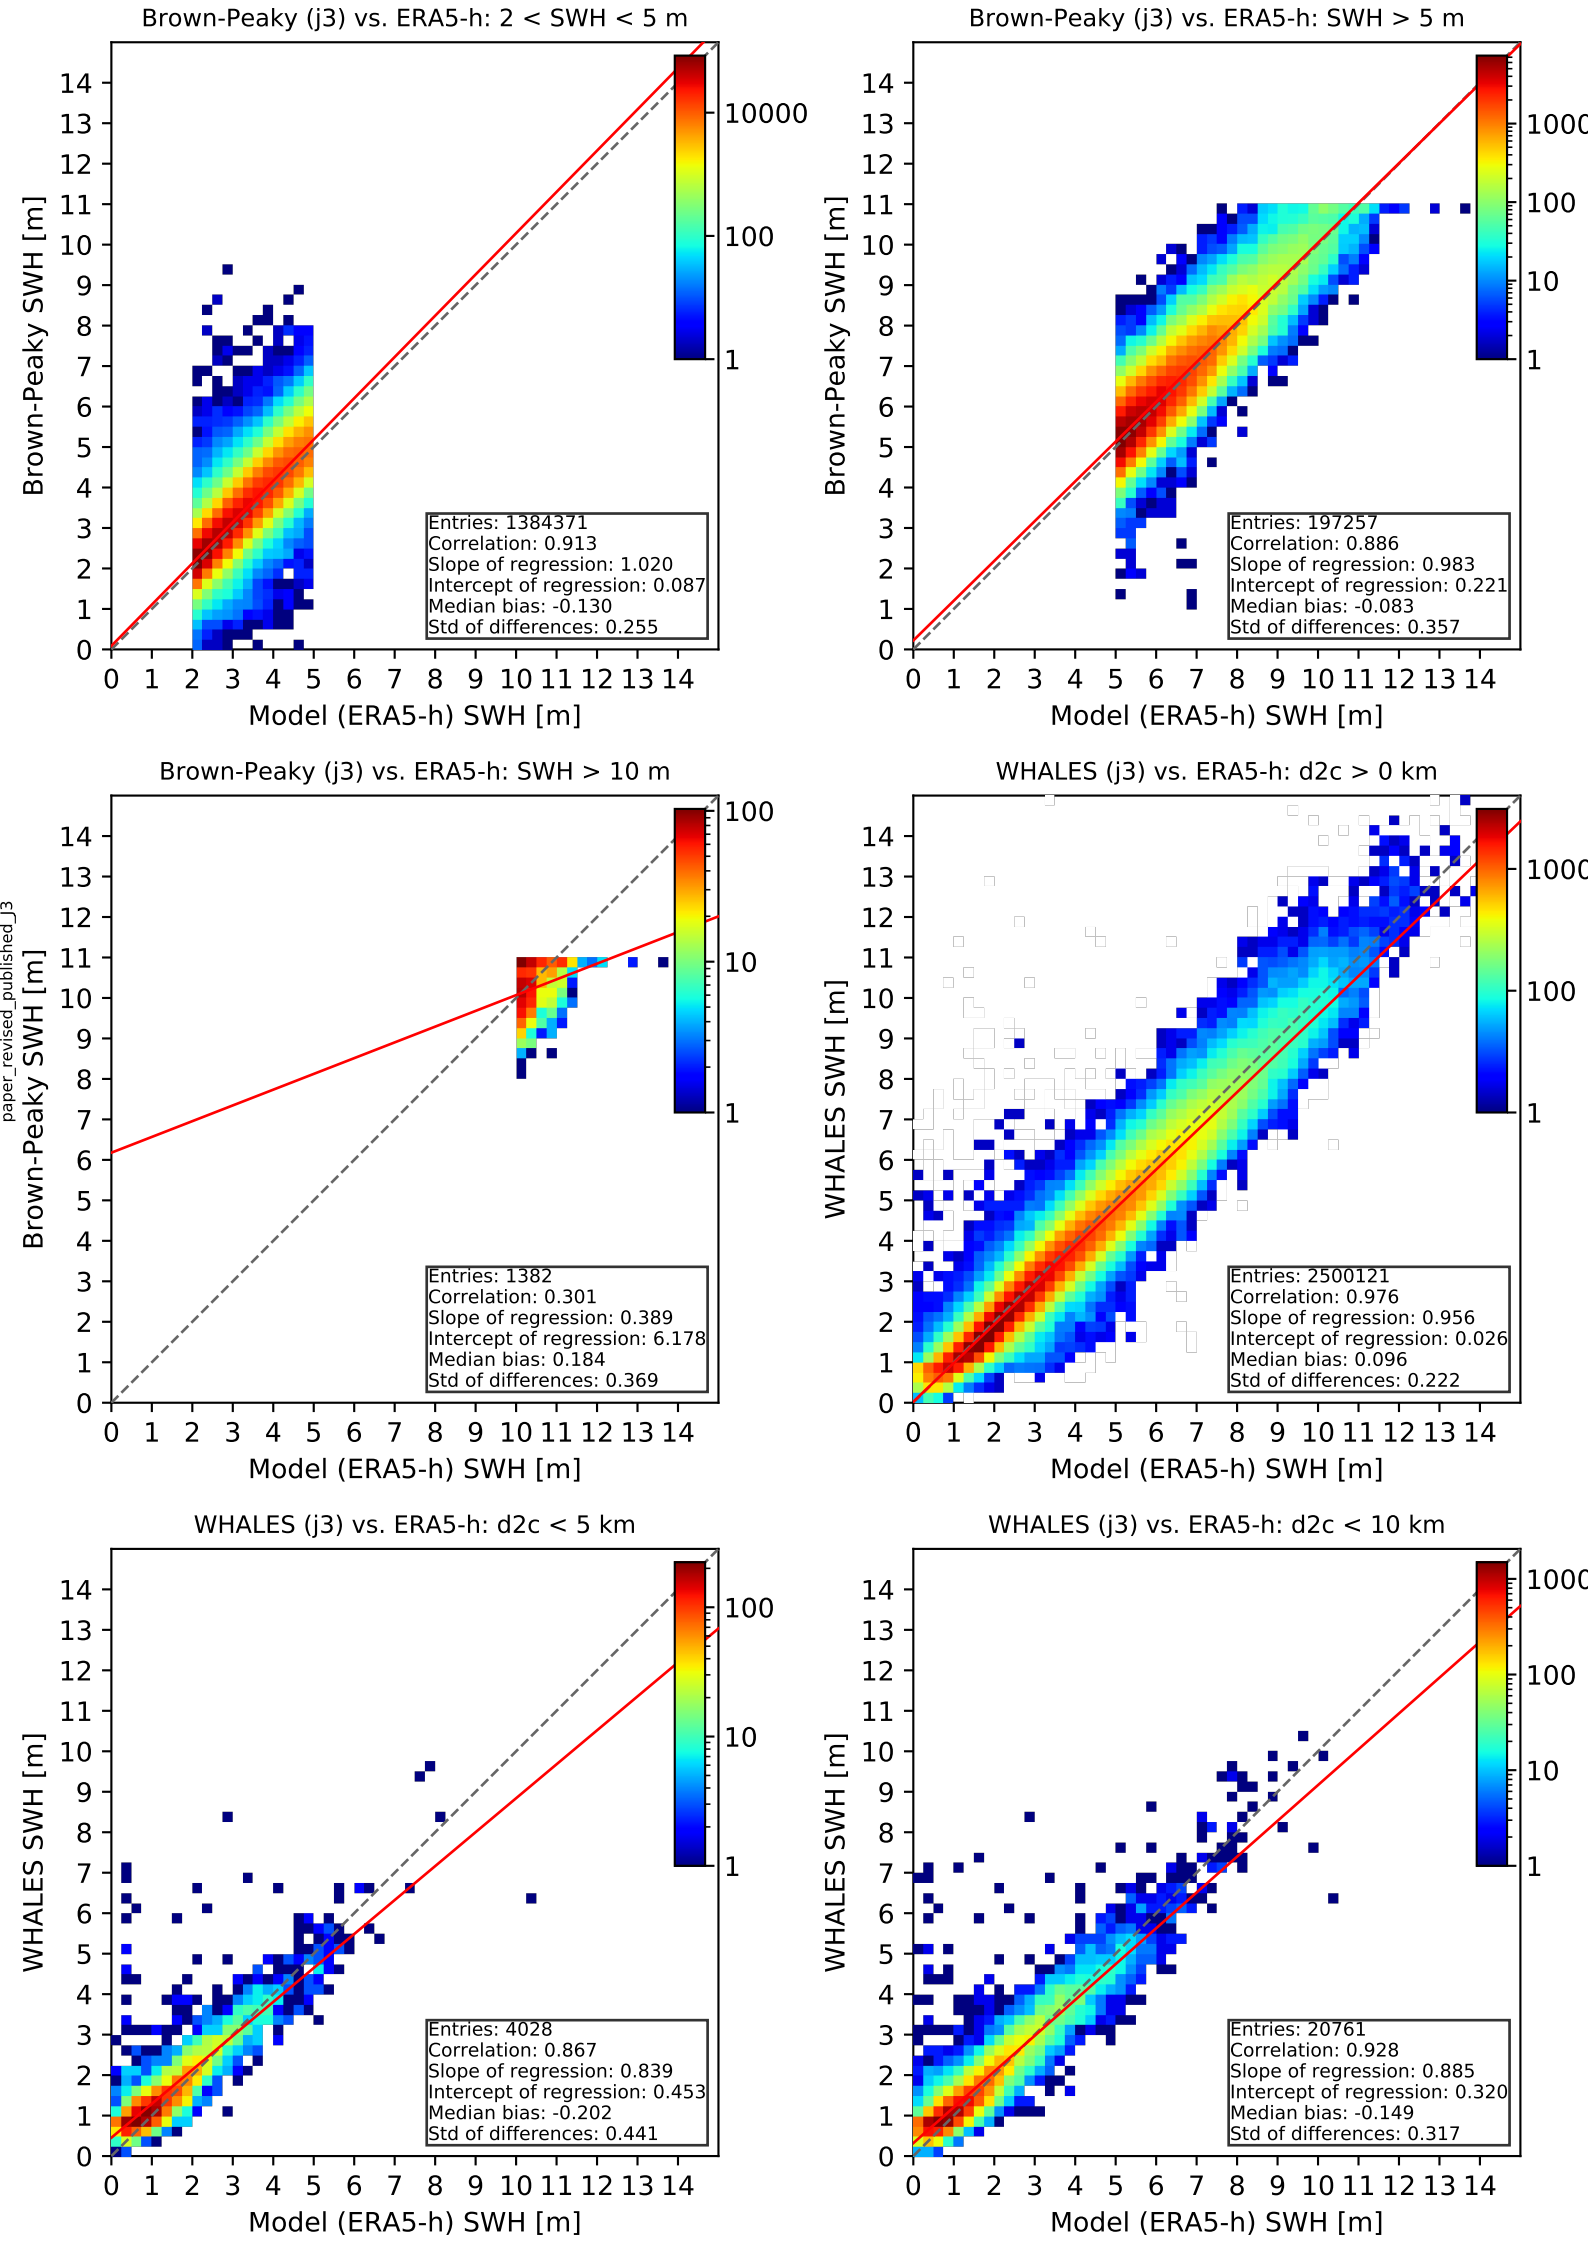

WHALES (j3) vs. ERA5-h: d2c &lt;= 20 km

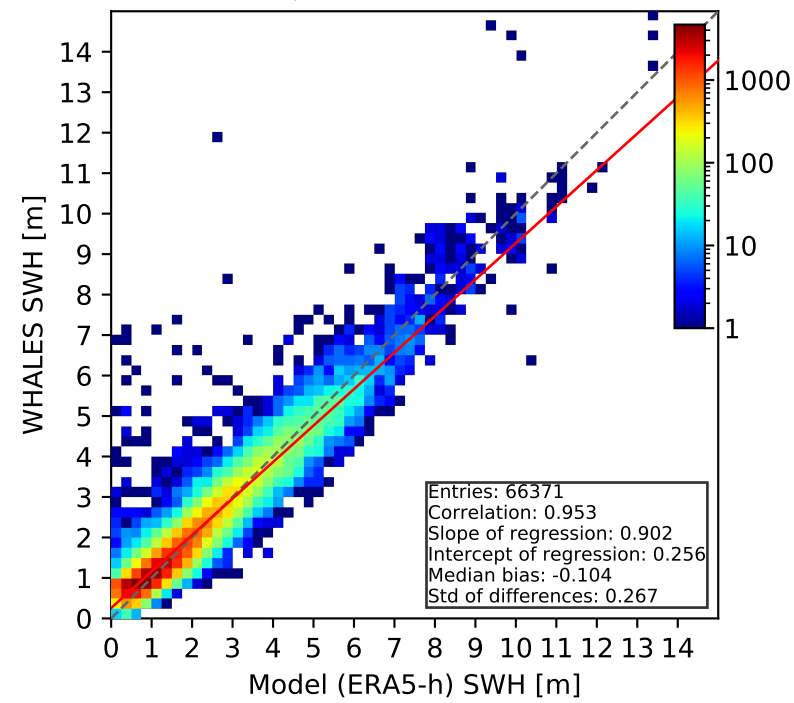

WHALES (j3) vs. ERA5-h: d2c &gt; 20 km

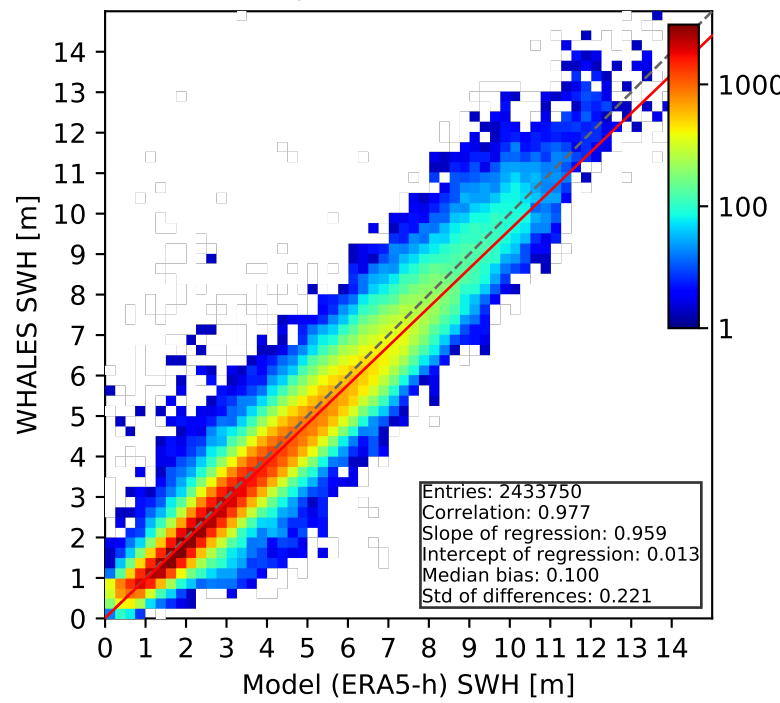

WHALES (j3) vs. ERA5-h: 0 &lt; SWH &lt; 2 m

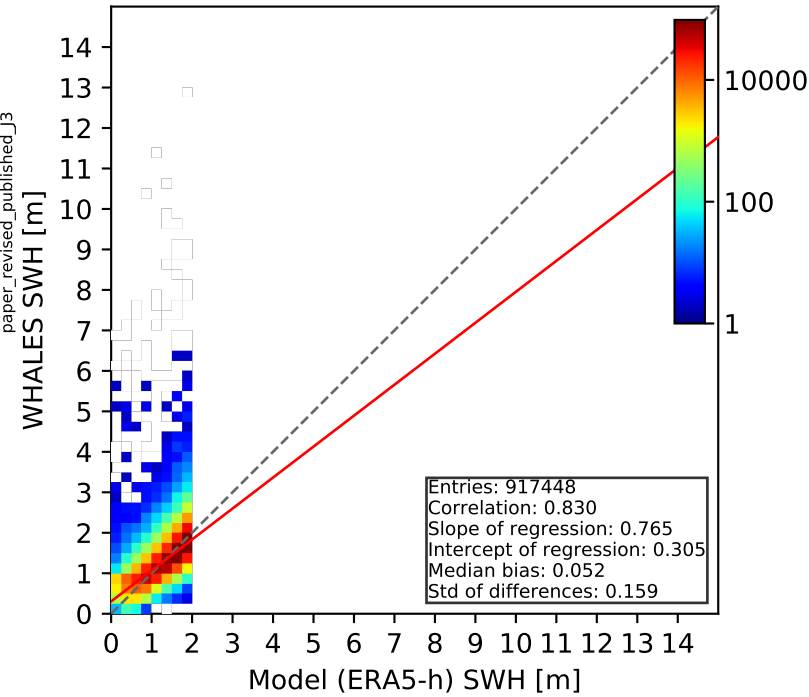

WHALES (j3) vs. ERA5-h: 2 &lt; SWH &lt; 5 m

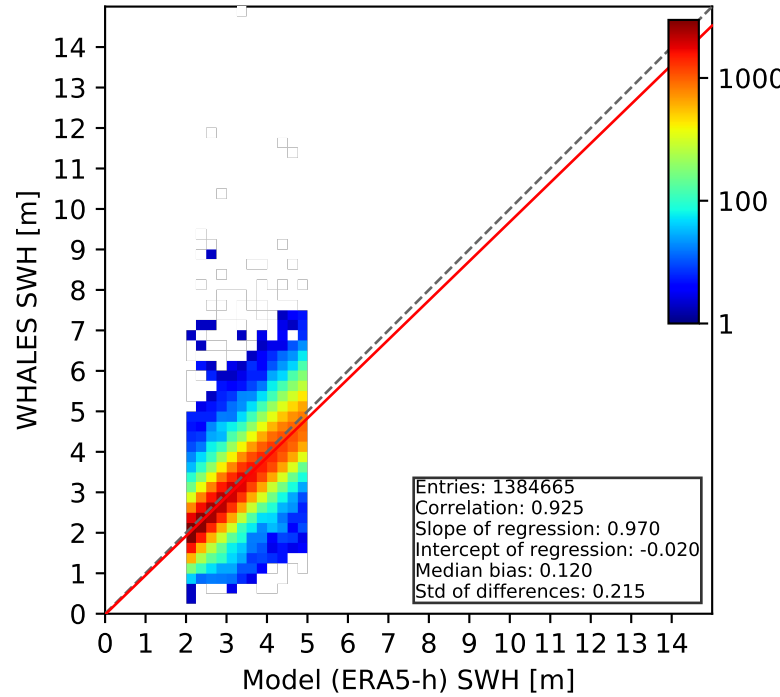

WHALES (j3) vs. ERA5-h: SWH &gt; 5 m

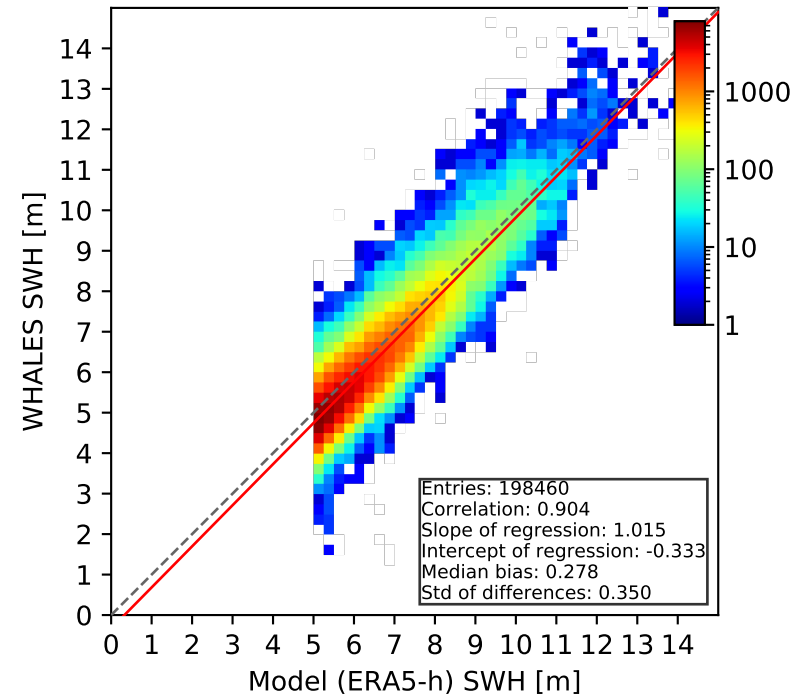

WHALES (j3) vs. ERA5-h: SWH &gt; 10 m

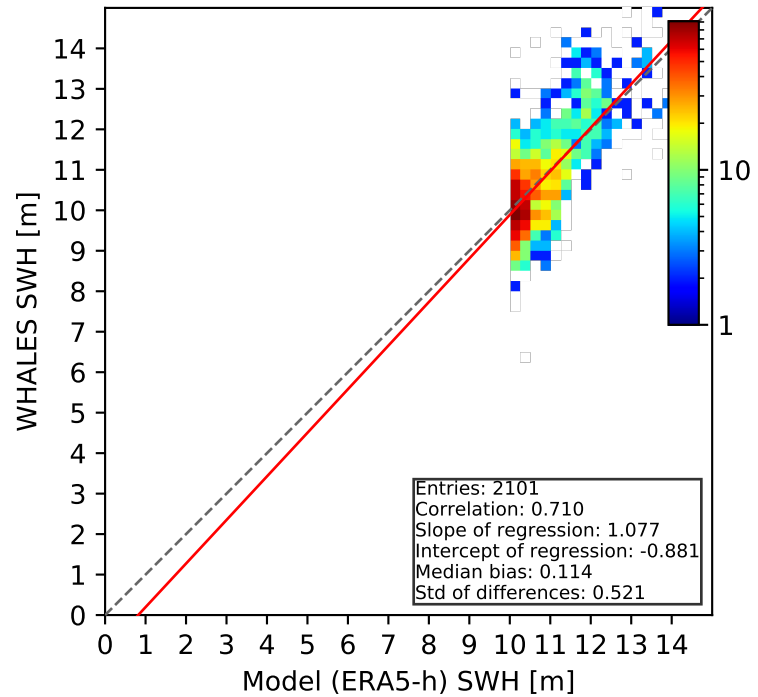

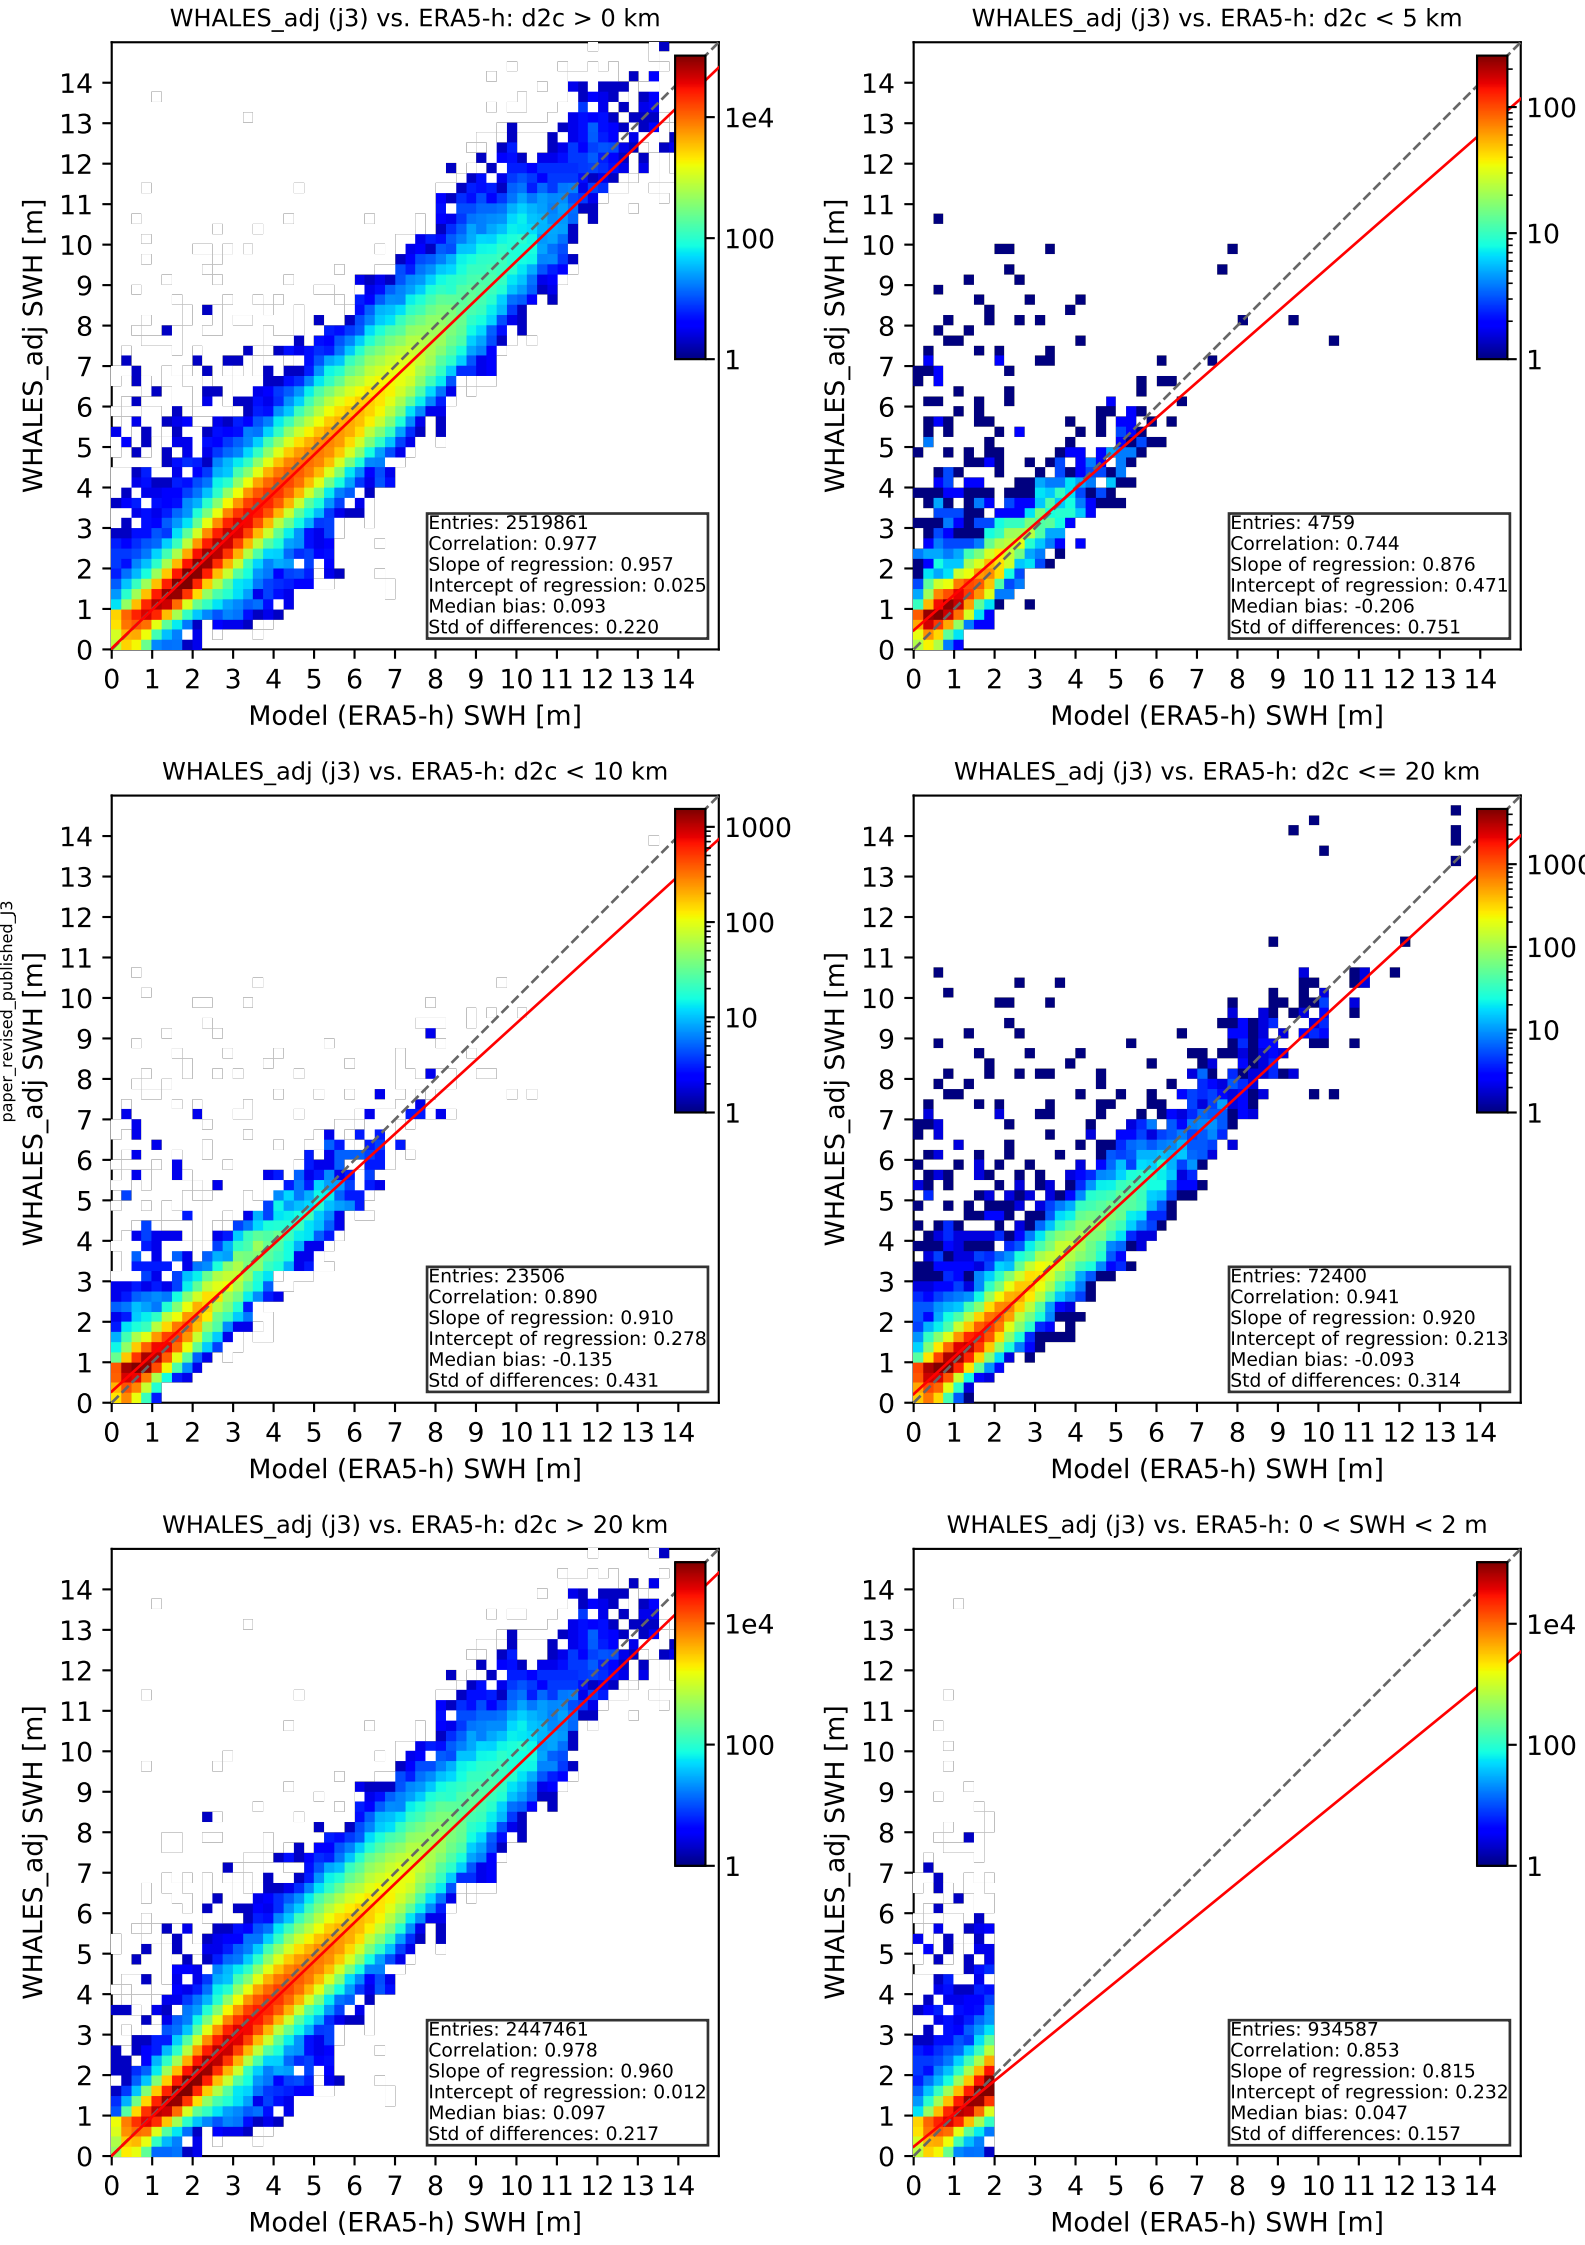

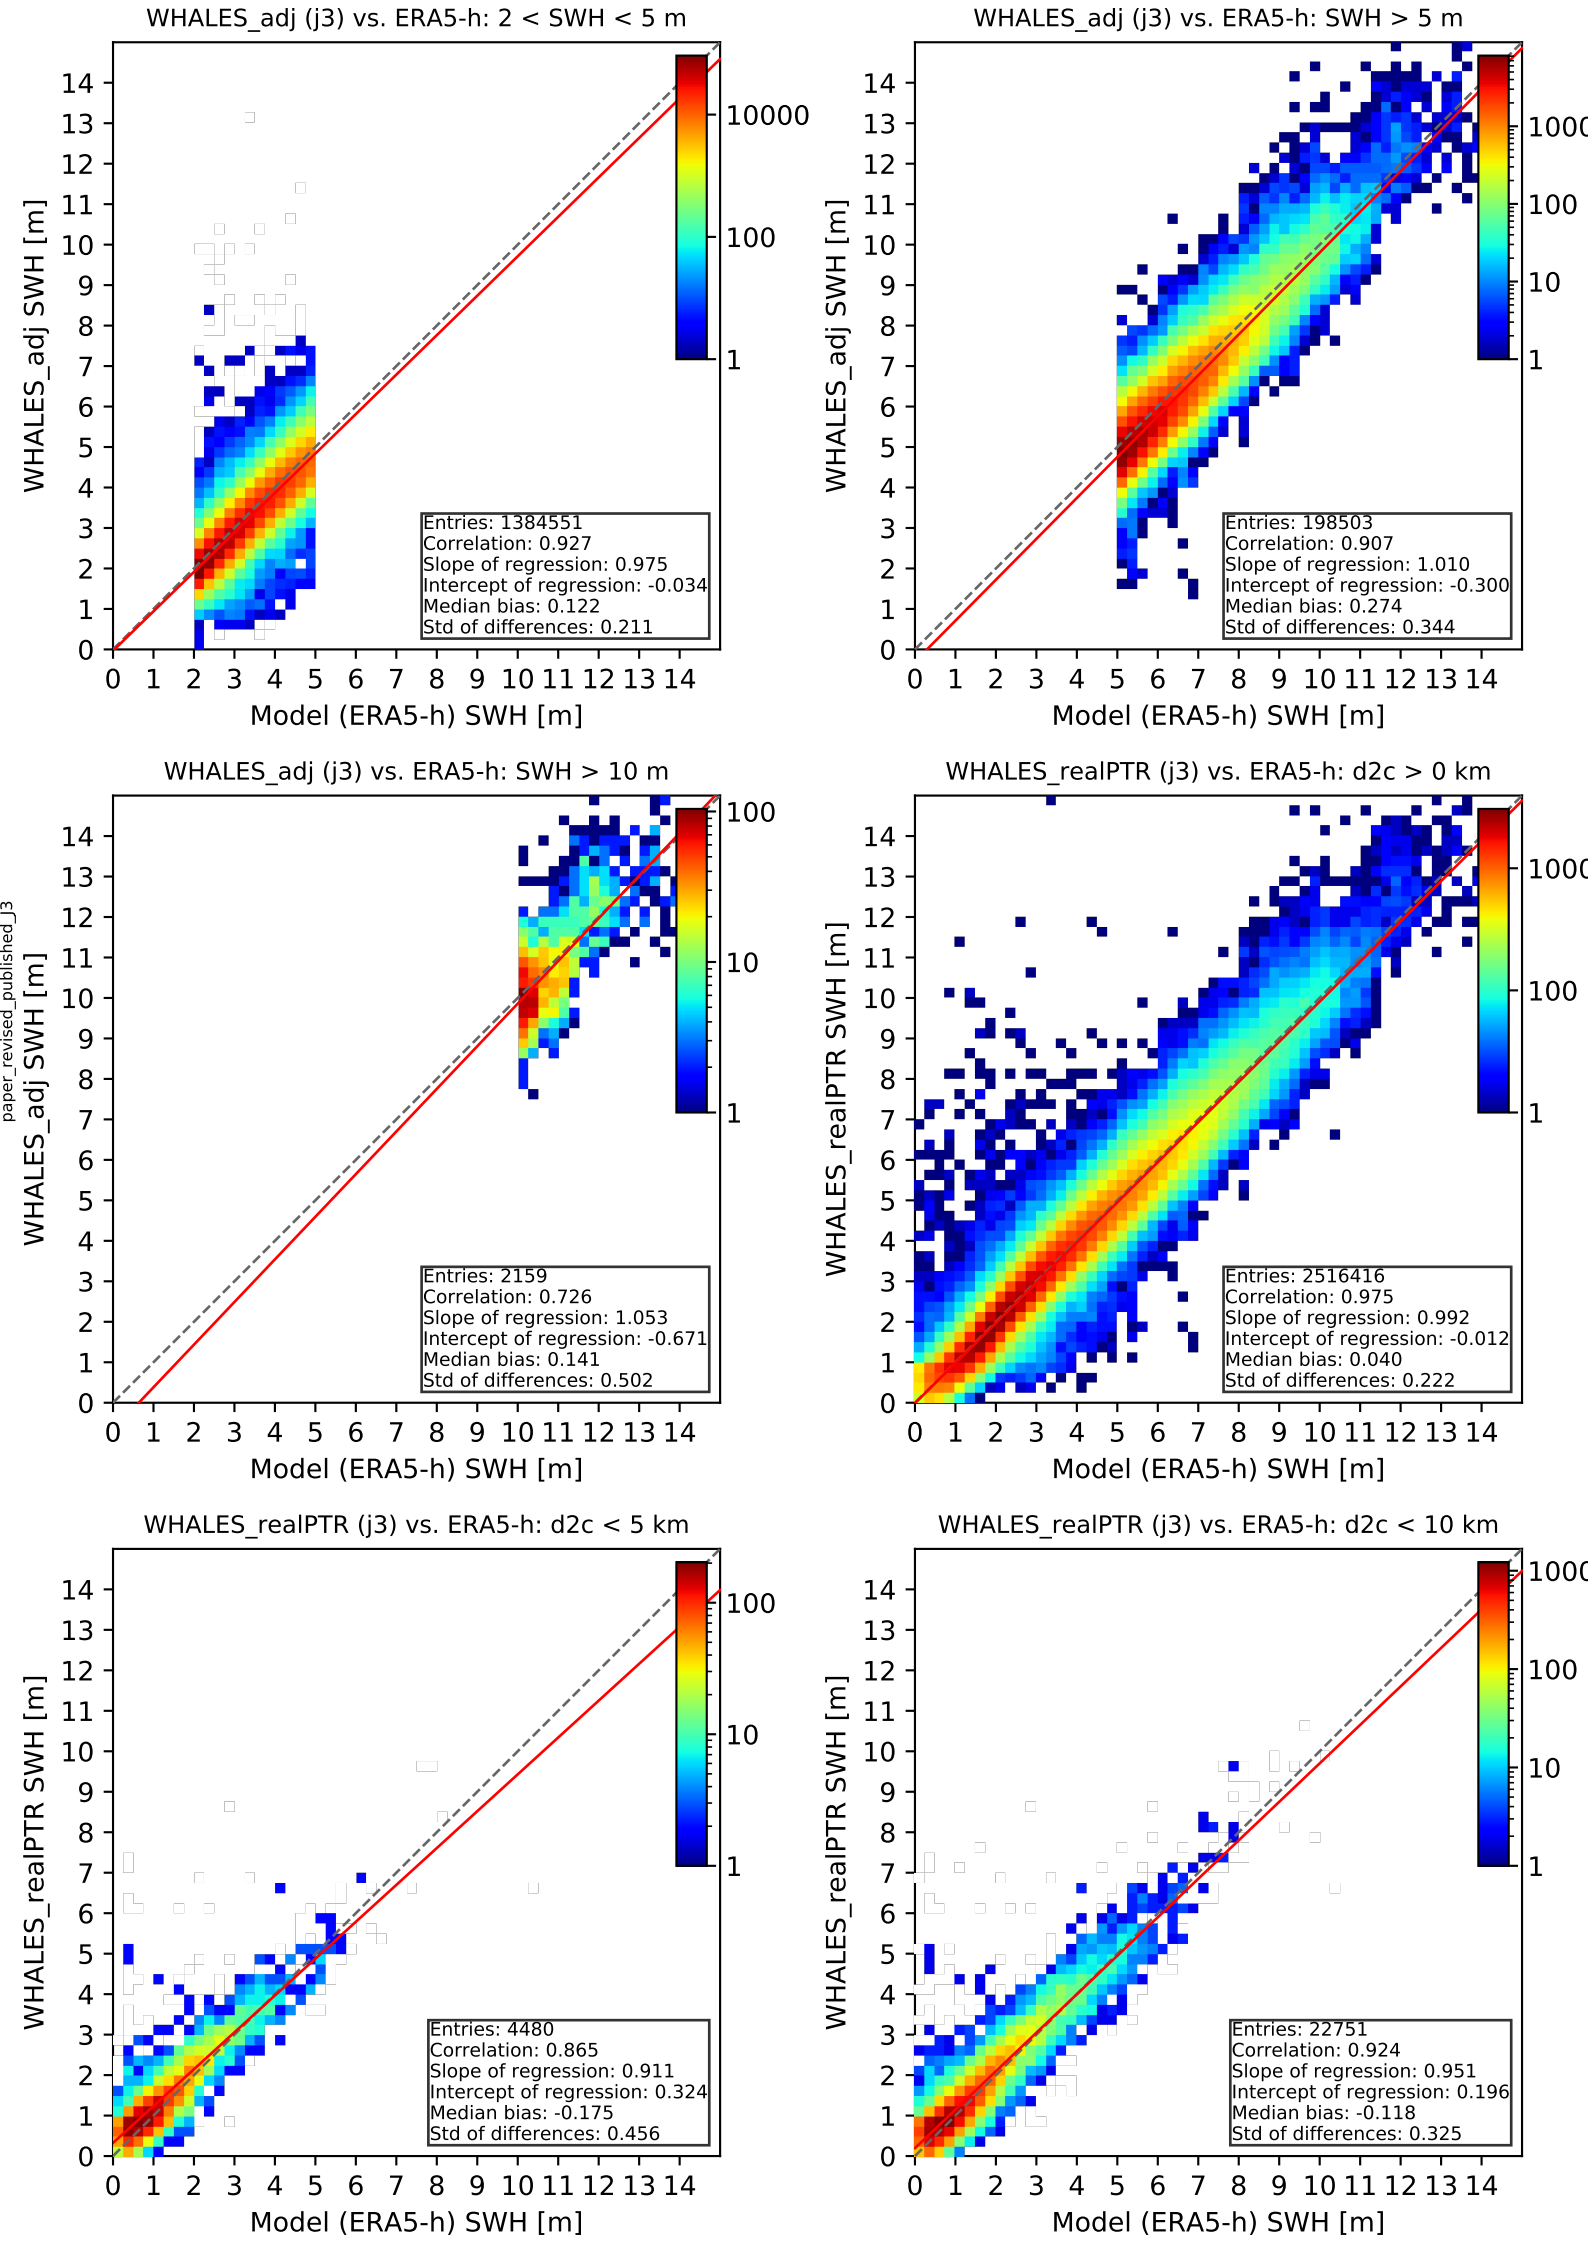

WHALES\_realIPTR (j3) vs. ERA5-h: d2c <= 20 km

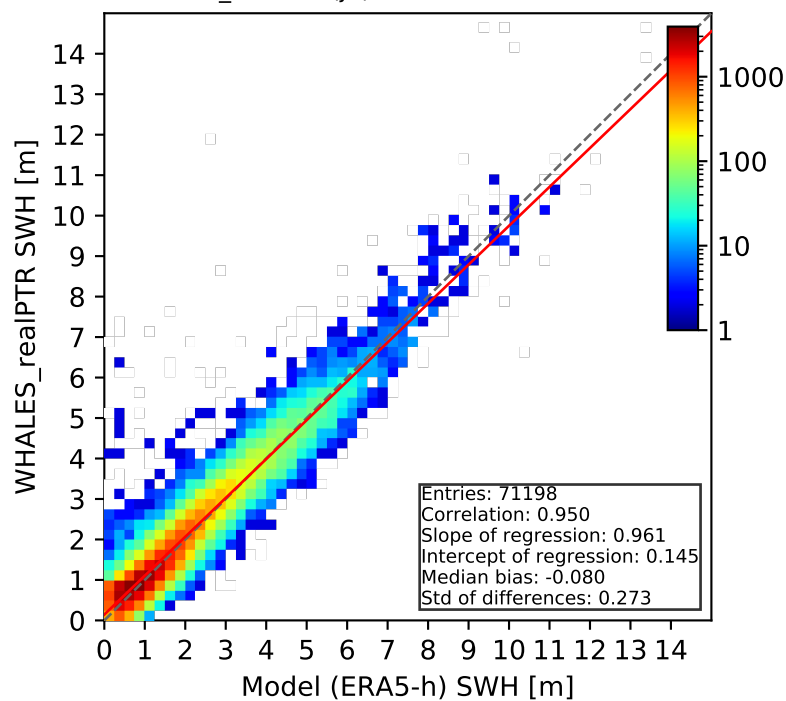

WHALES\_realIPTR (j3) vs. ERA5-h: d2c > 20 km

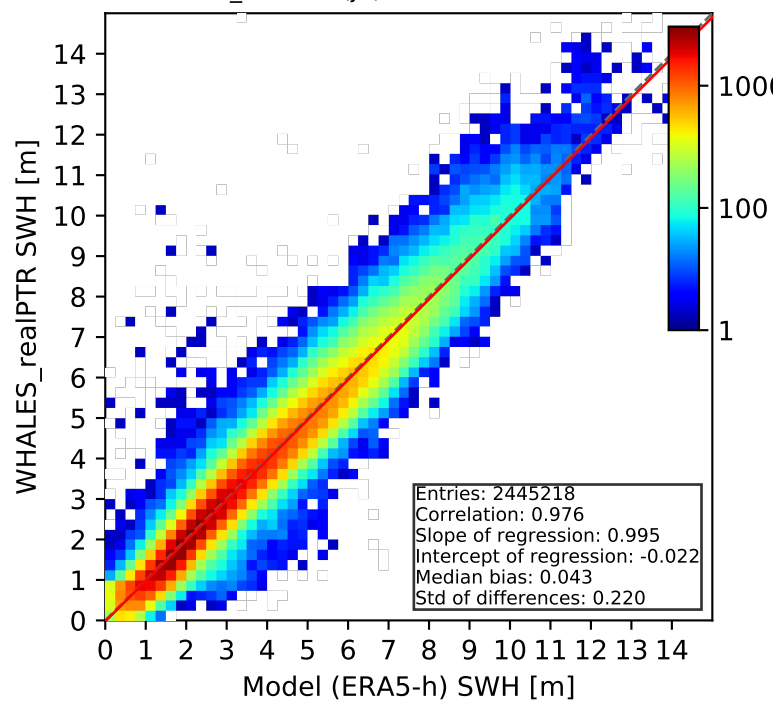

WHALES\_realIPTR (j3) vs. ERA5-h: 0 < SWH < 2 m

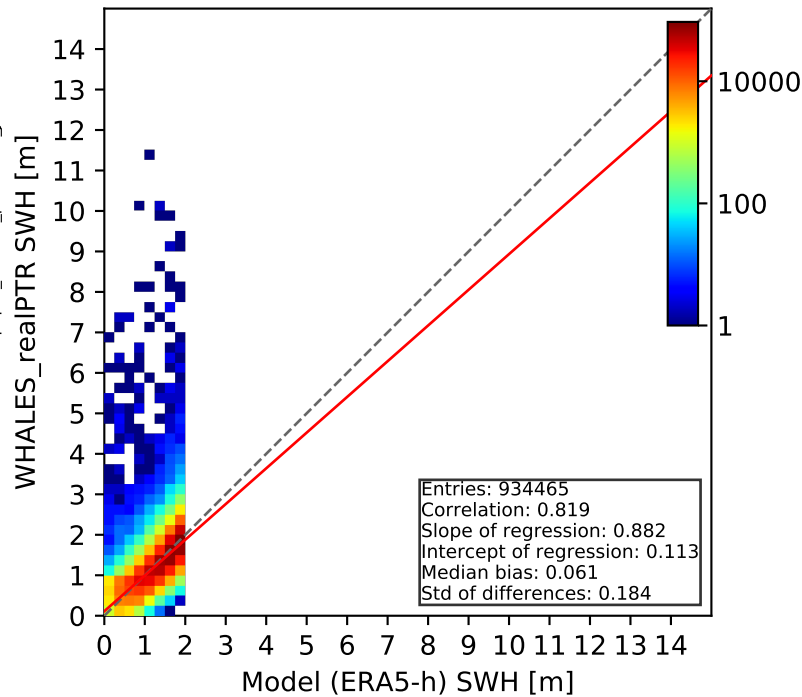

WHALES\_realIPTR (j3) vs. ERA5-h: 2 < SWH < 5 m

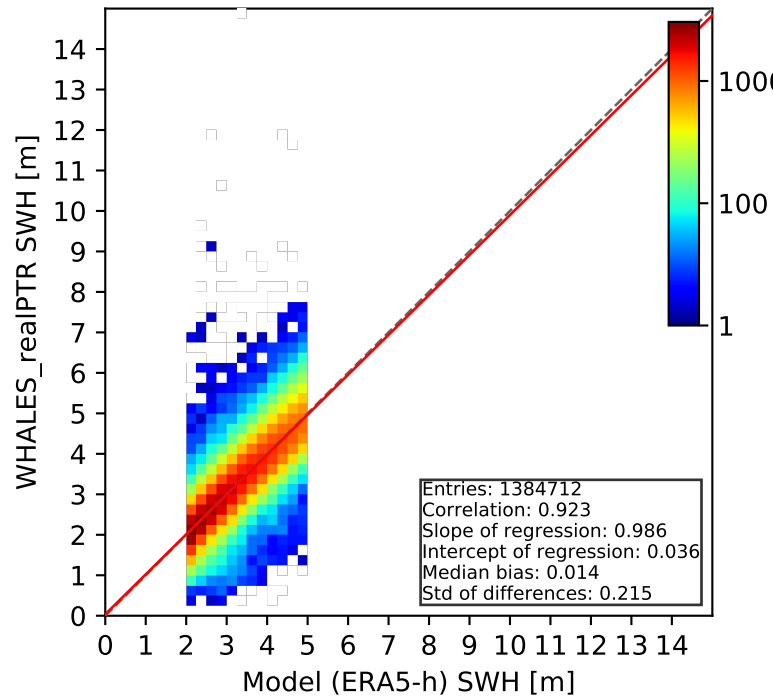

WHALES\_realIPTR (j3) vs. ERA5-h: SWH > 5 m

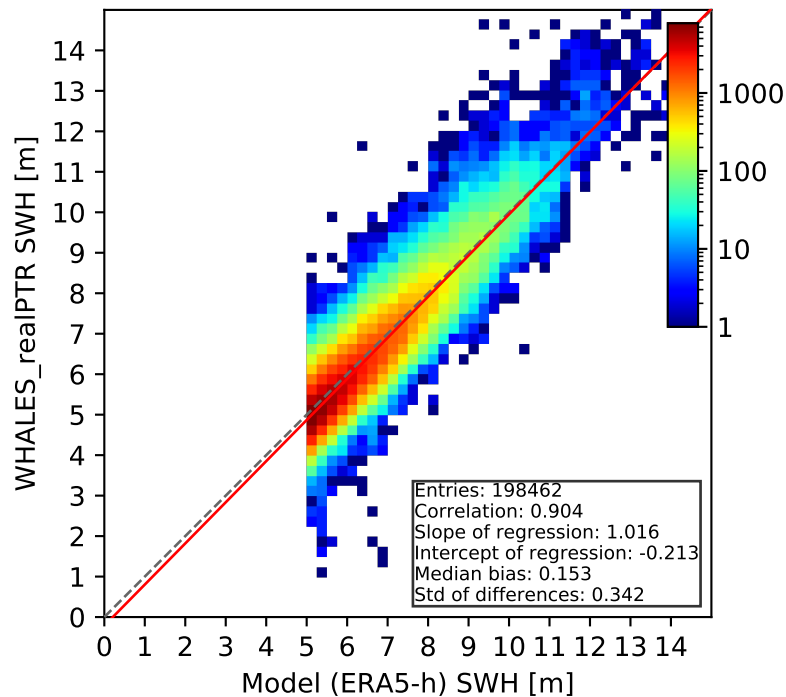

WHALES\_realIPTR (j3) vs. ERA5-h: SWH > 10 m

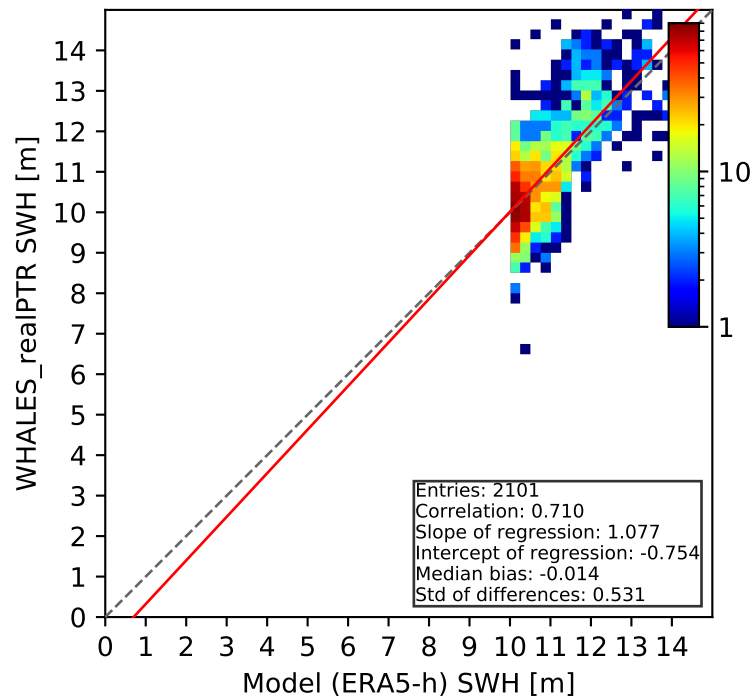

WHALES\_realPTR\_adj (j3) vs. ERA5-h: d2c > 0 km

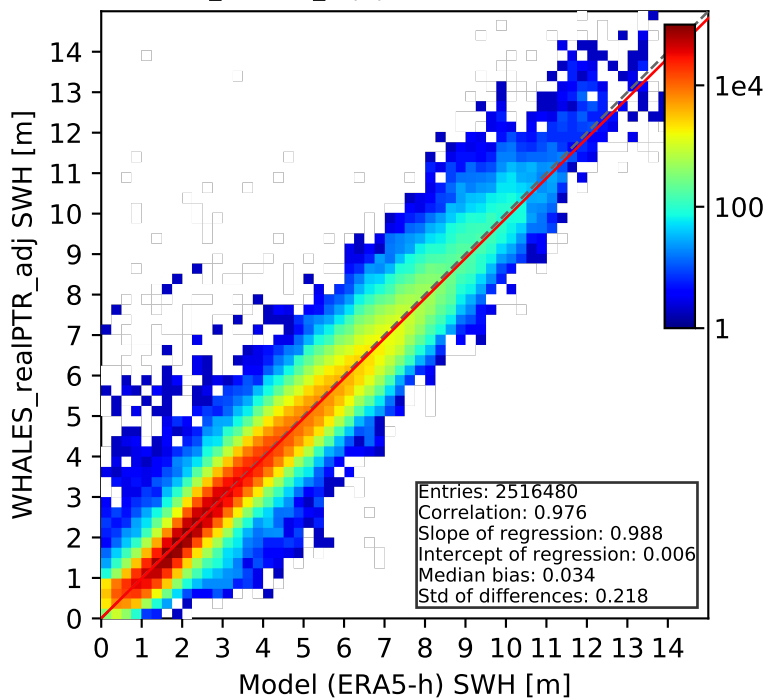

WHALES\_realPTR\_adj (j3) vs. ERA5-h: d2c < 5 km

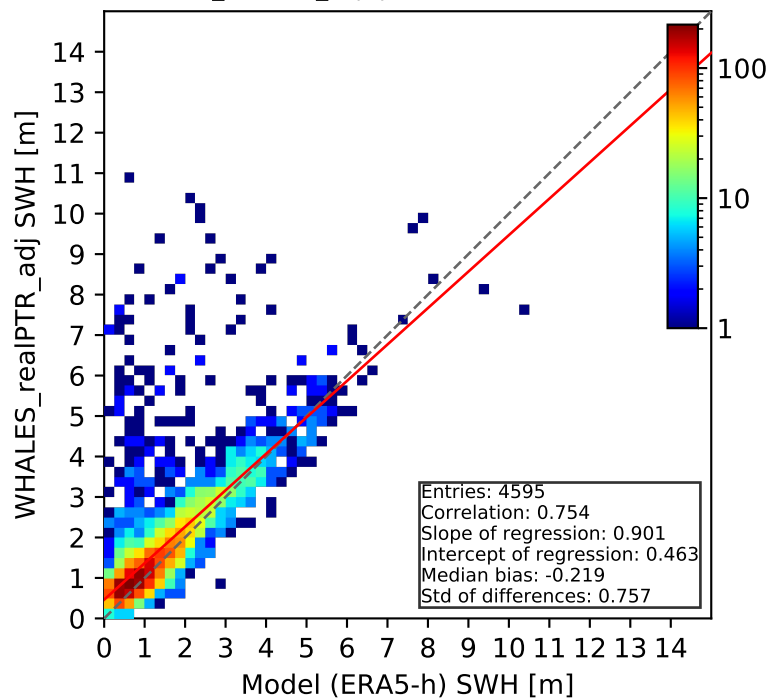

WHALES\_realPTR\_adj (j3) vs. ERA5-h: d2c < 10 km

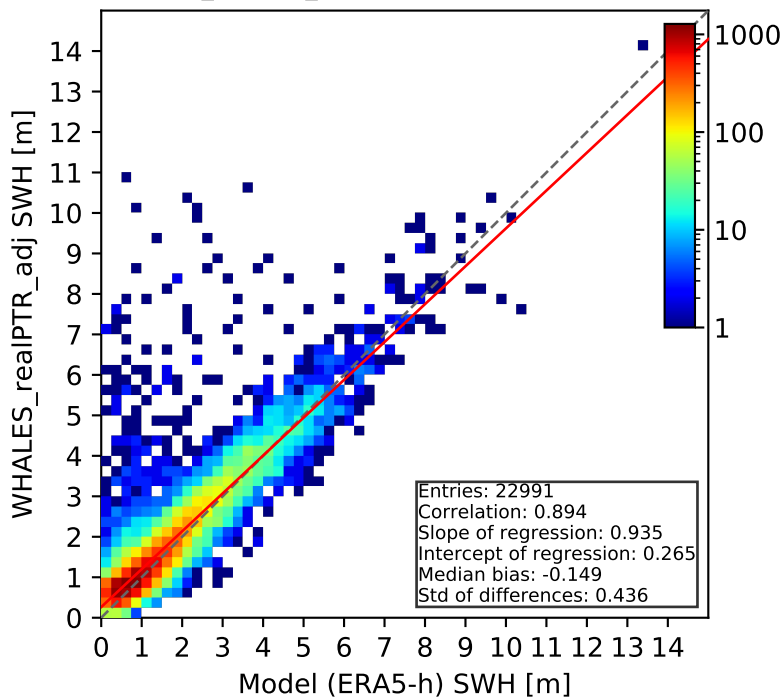

WHALES\_realPTR\_adj (j3) vs. ERA5-h: d2c <= 20 km

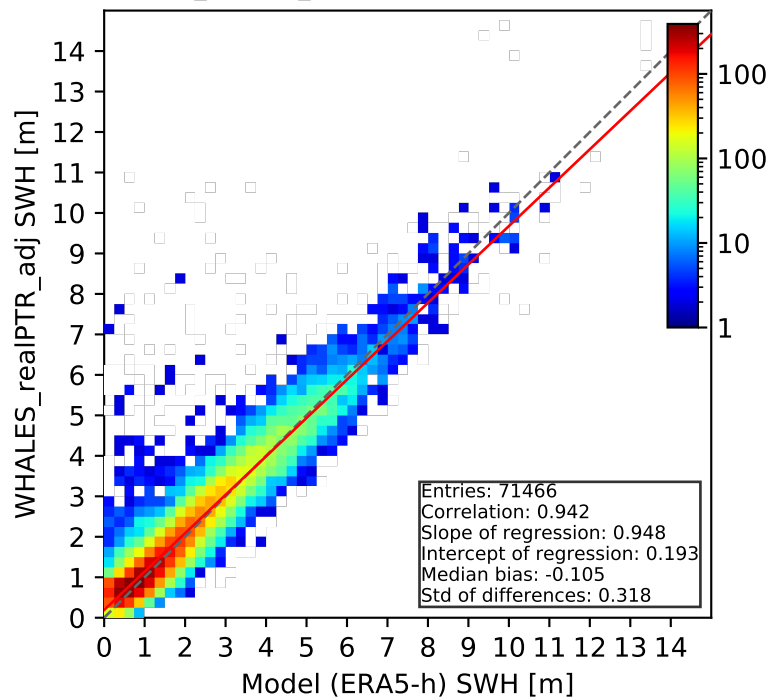

WHALES\_realPTR\_adj (j3) vs. ERA5-h: d2c > 20 km

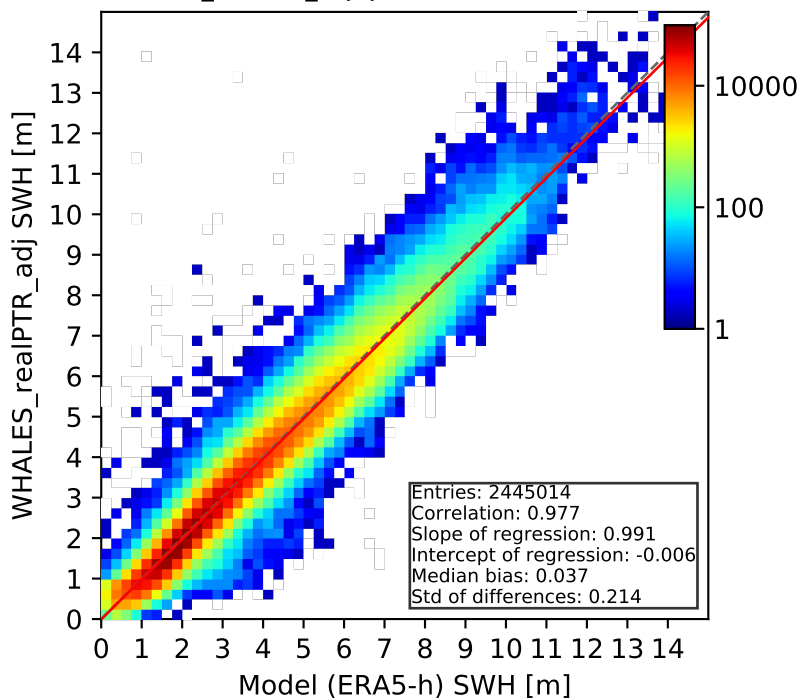

WHALES\_realPTR\_adj (j3) vs. ERA5-h: 0 < SWH < 2 m

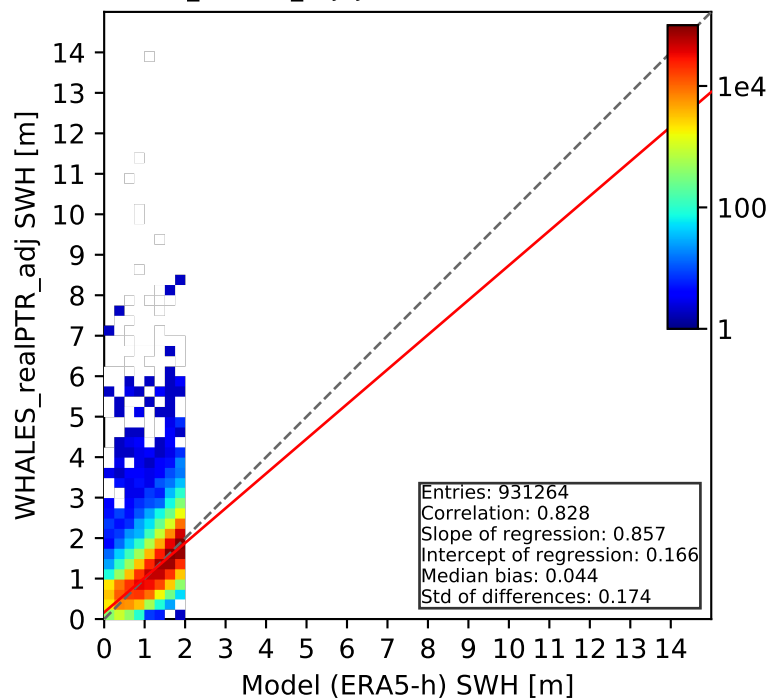

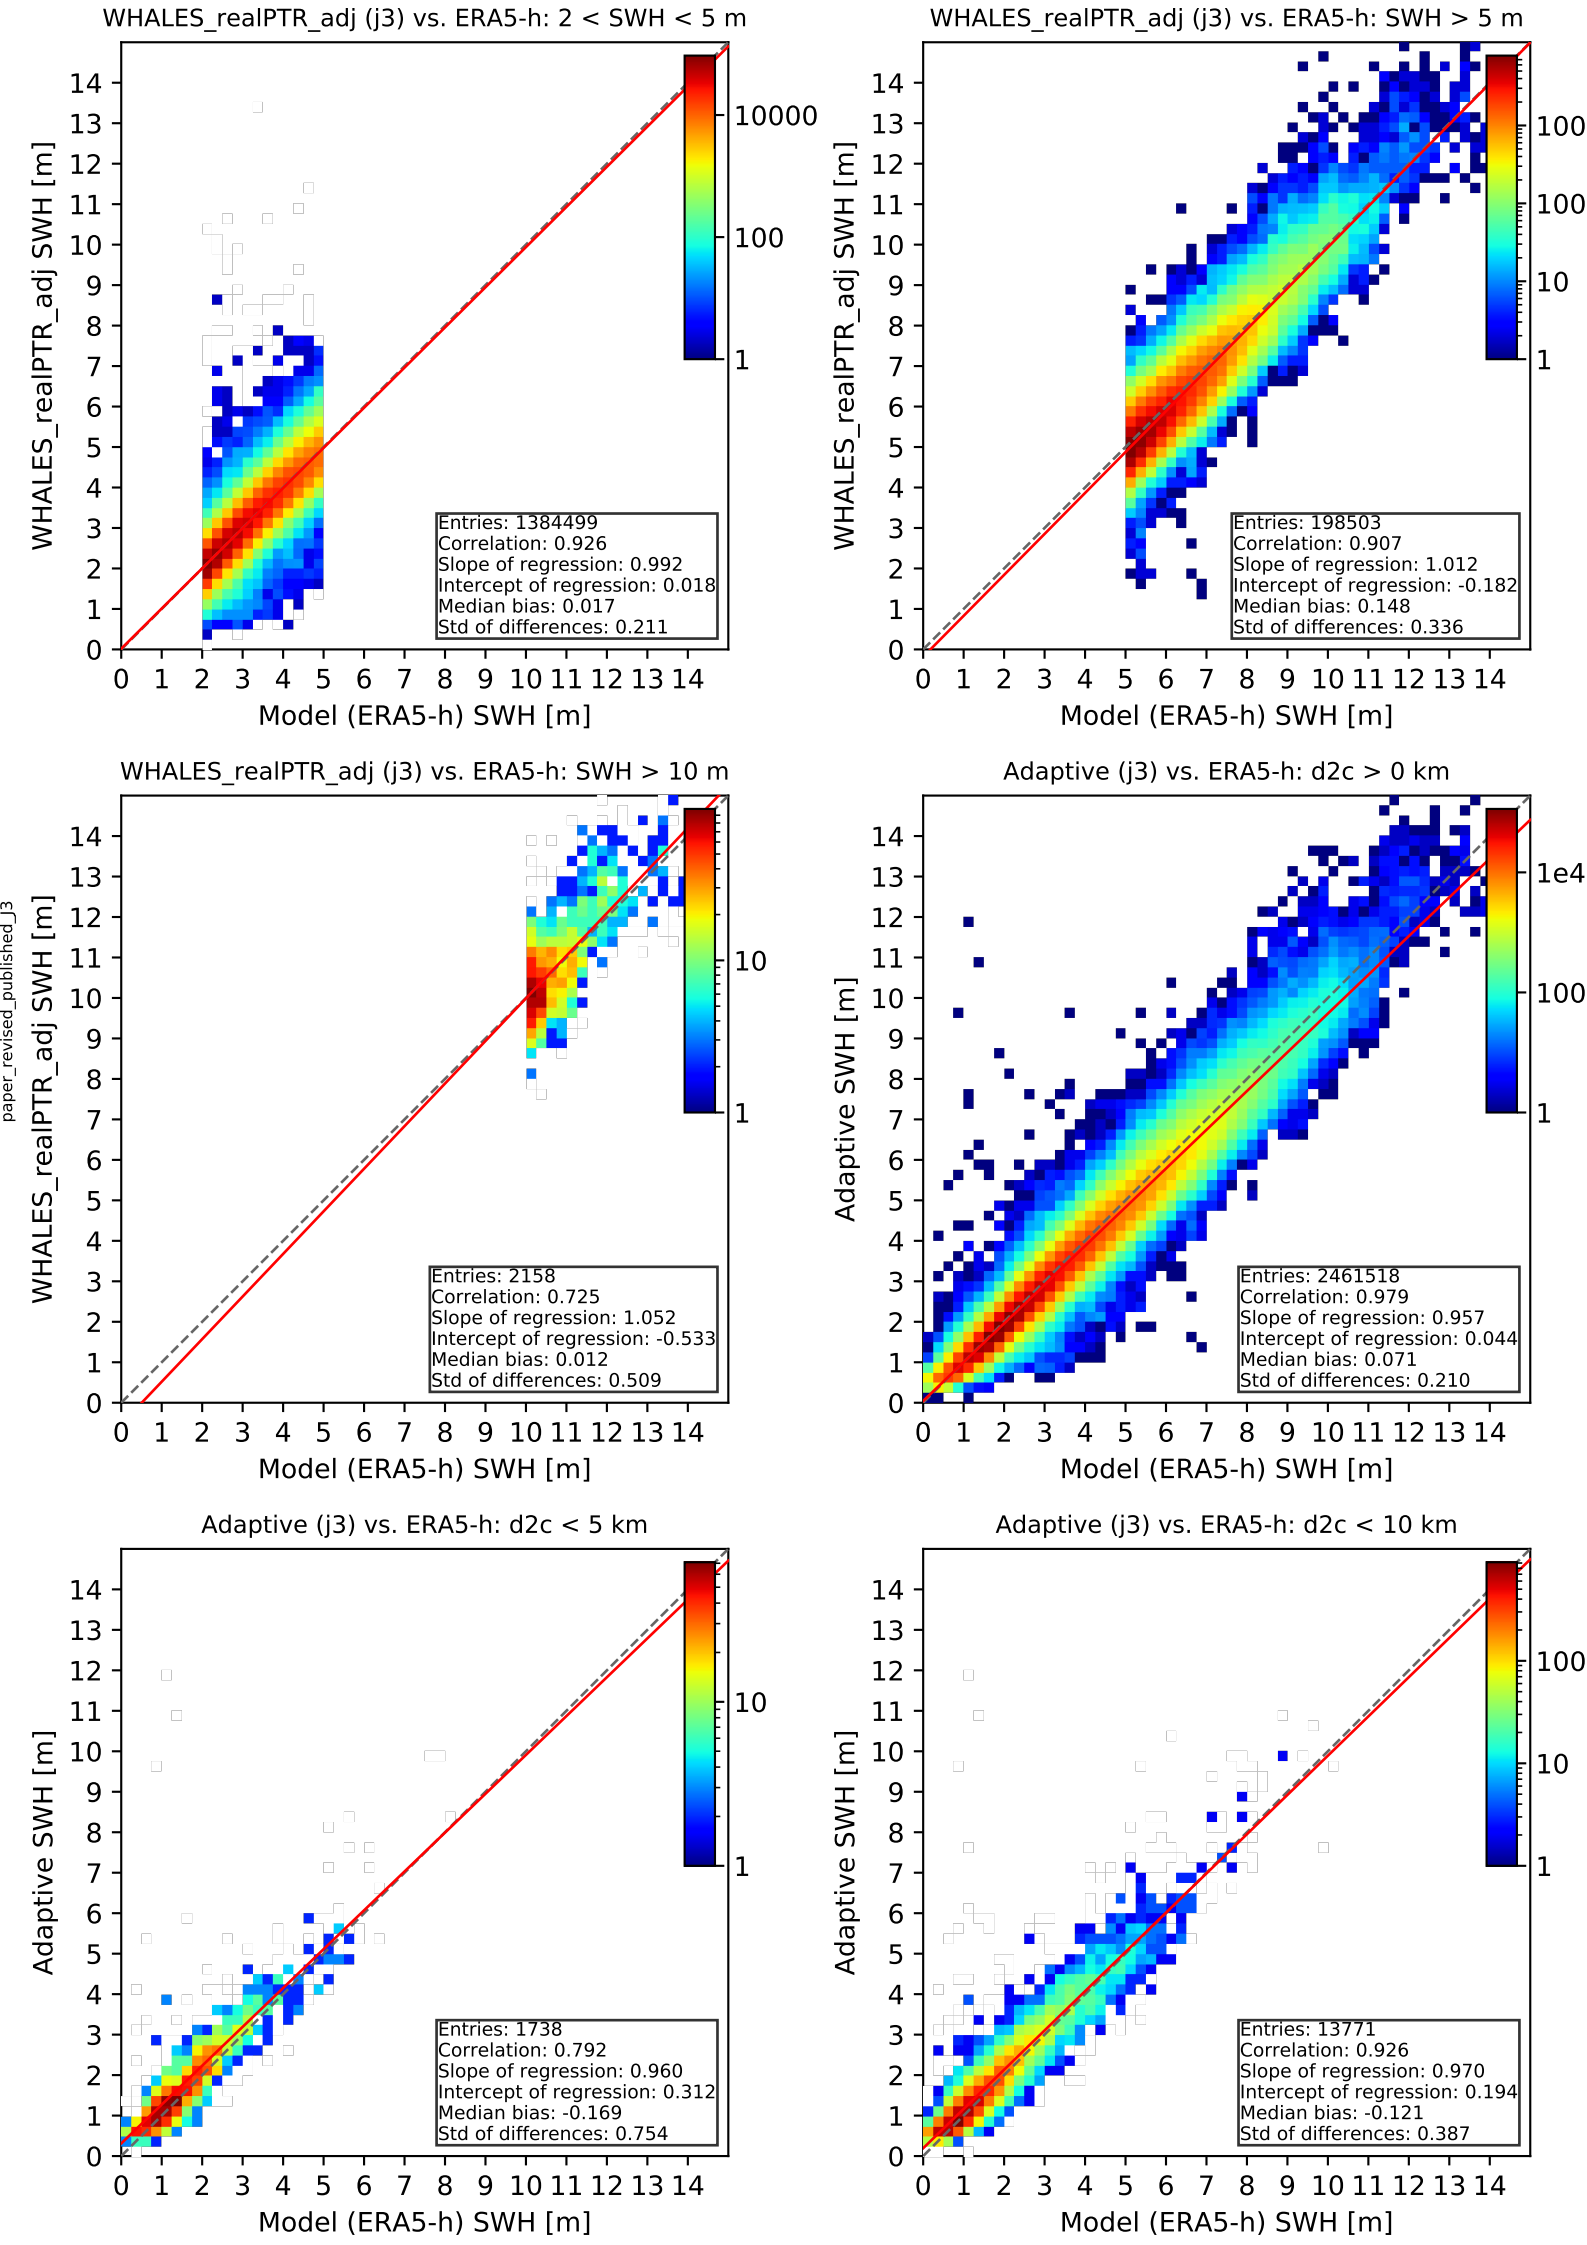

Adaptive (j3) vs. ERA5-h: d2c &lt;= 20 km

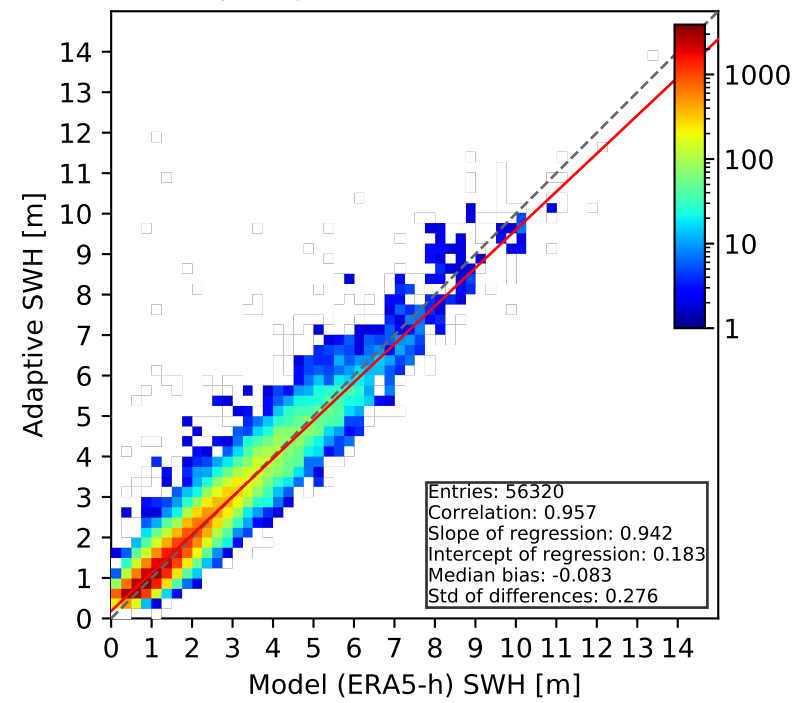

Adaptive (j3) vs. ERA5-h: d2c &gt; 20 km

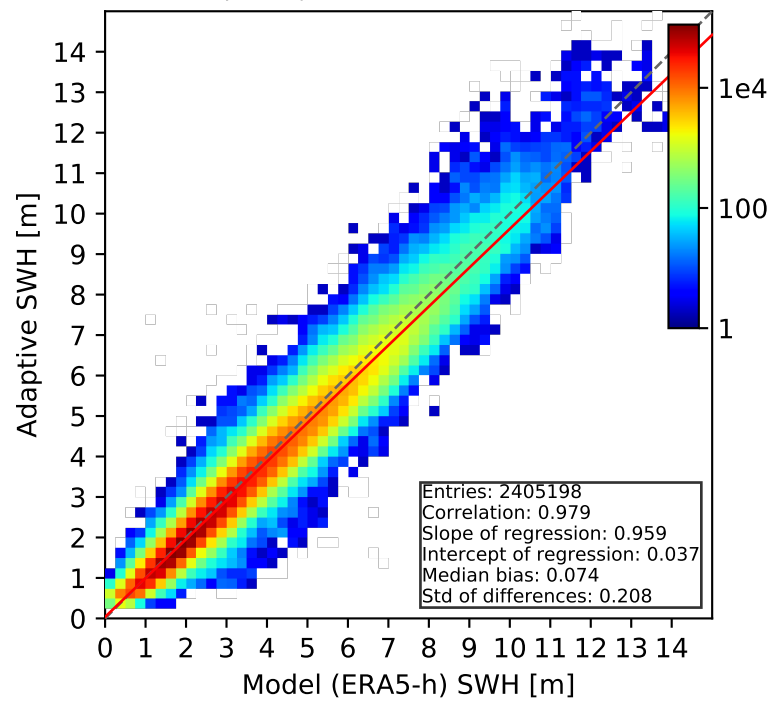

Adaptive (j3) vs. ERA5-h: 0 &lt; SWH &lt; 2 m

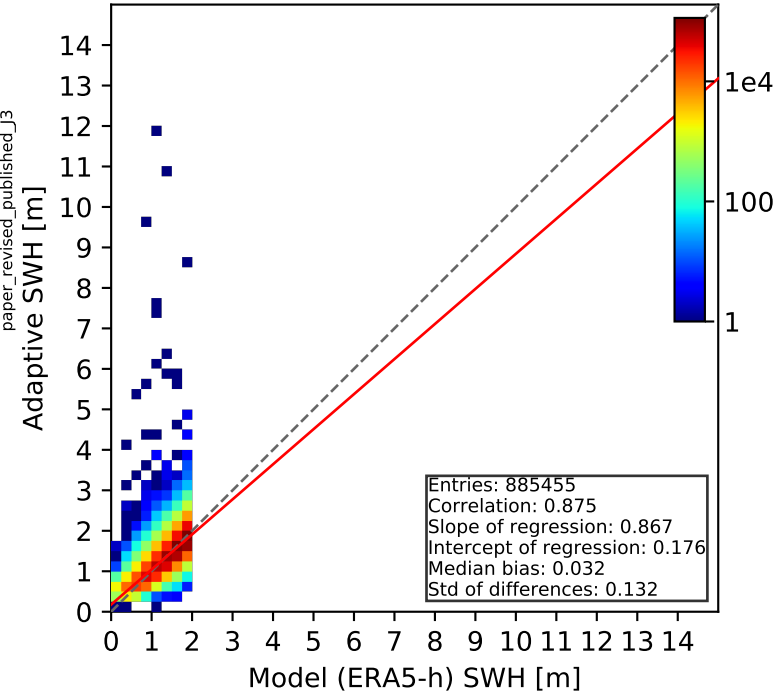

Adaptive (j3) vs. ERA5-h: 2 &lt; SWH &lt; 5 m

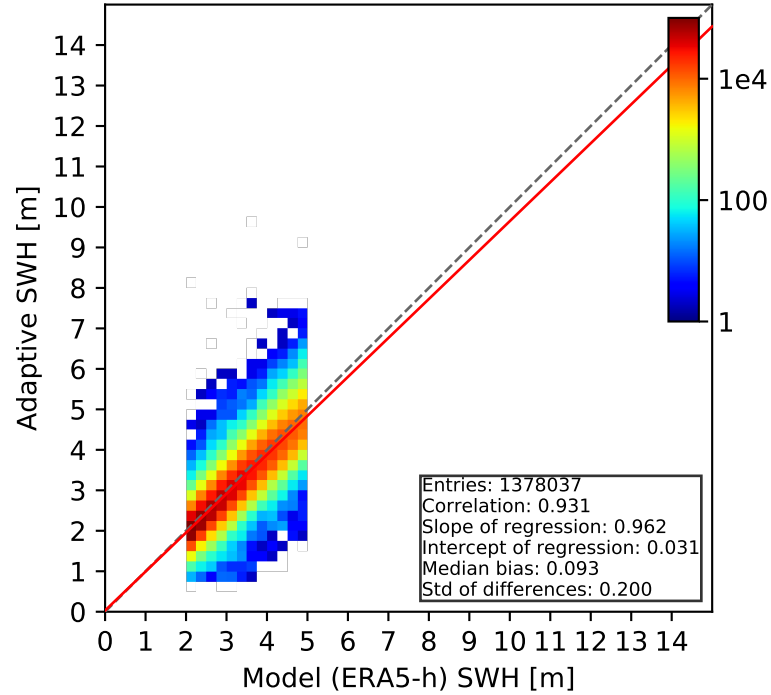

Adaptive (j3) vs. ERA5-h: SWH &gt; 5 m

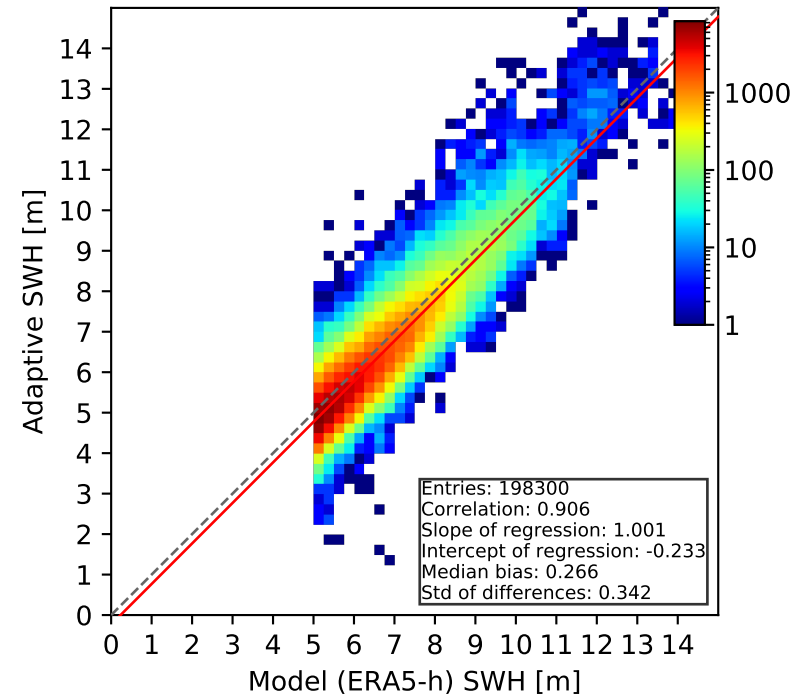

Adaptive (j3) vs. ERA5-h: SWH &gt; 10 m

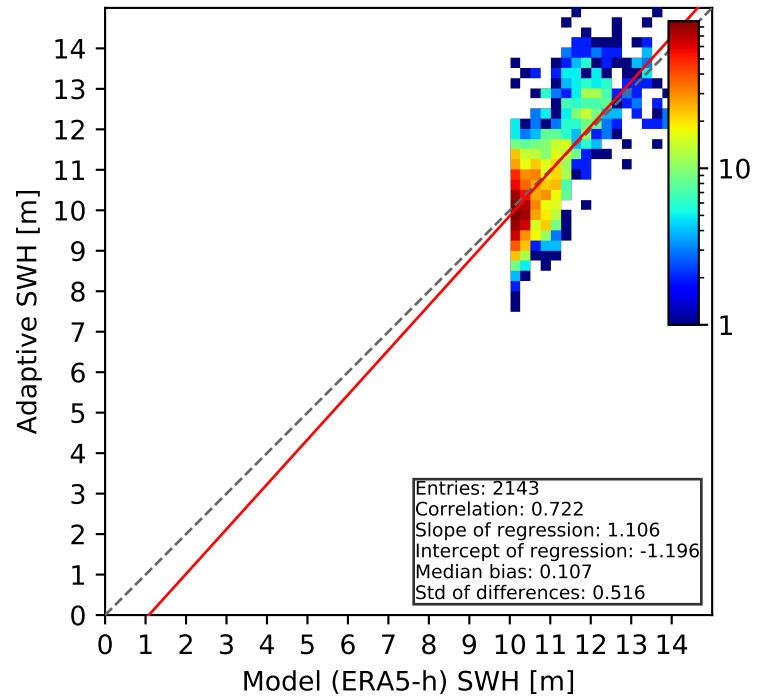

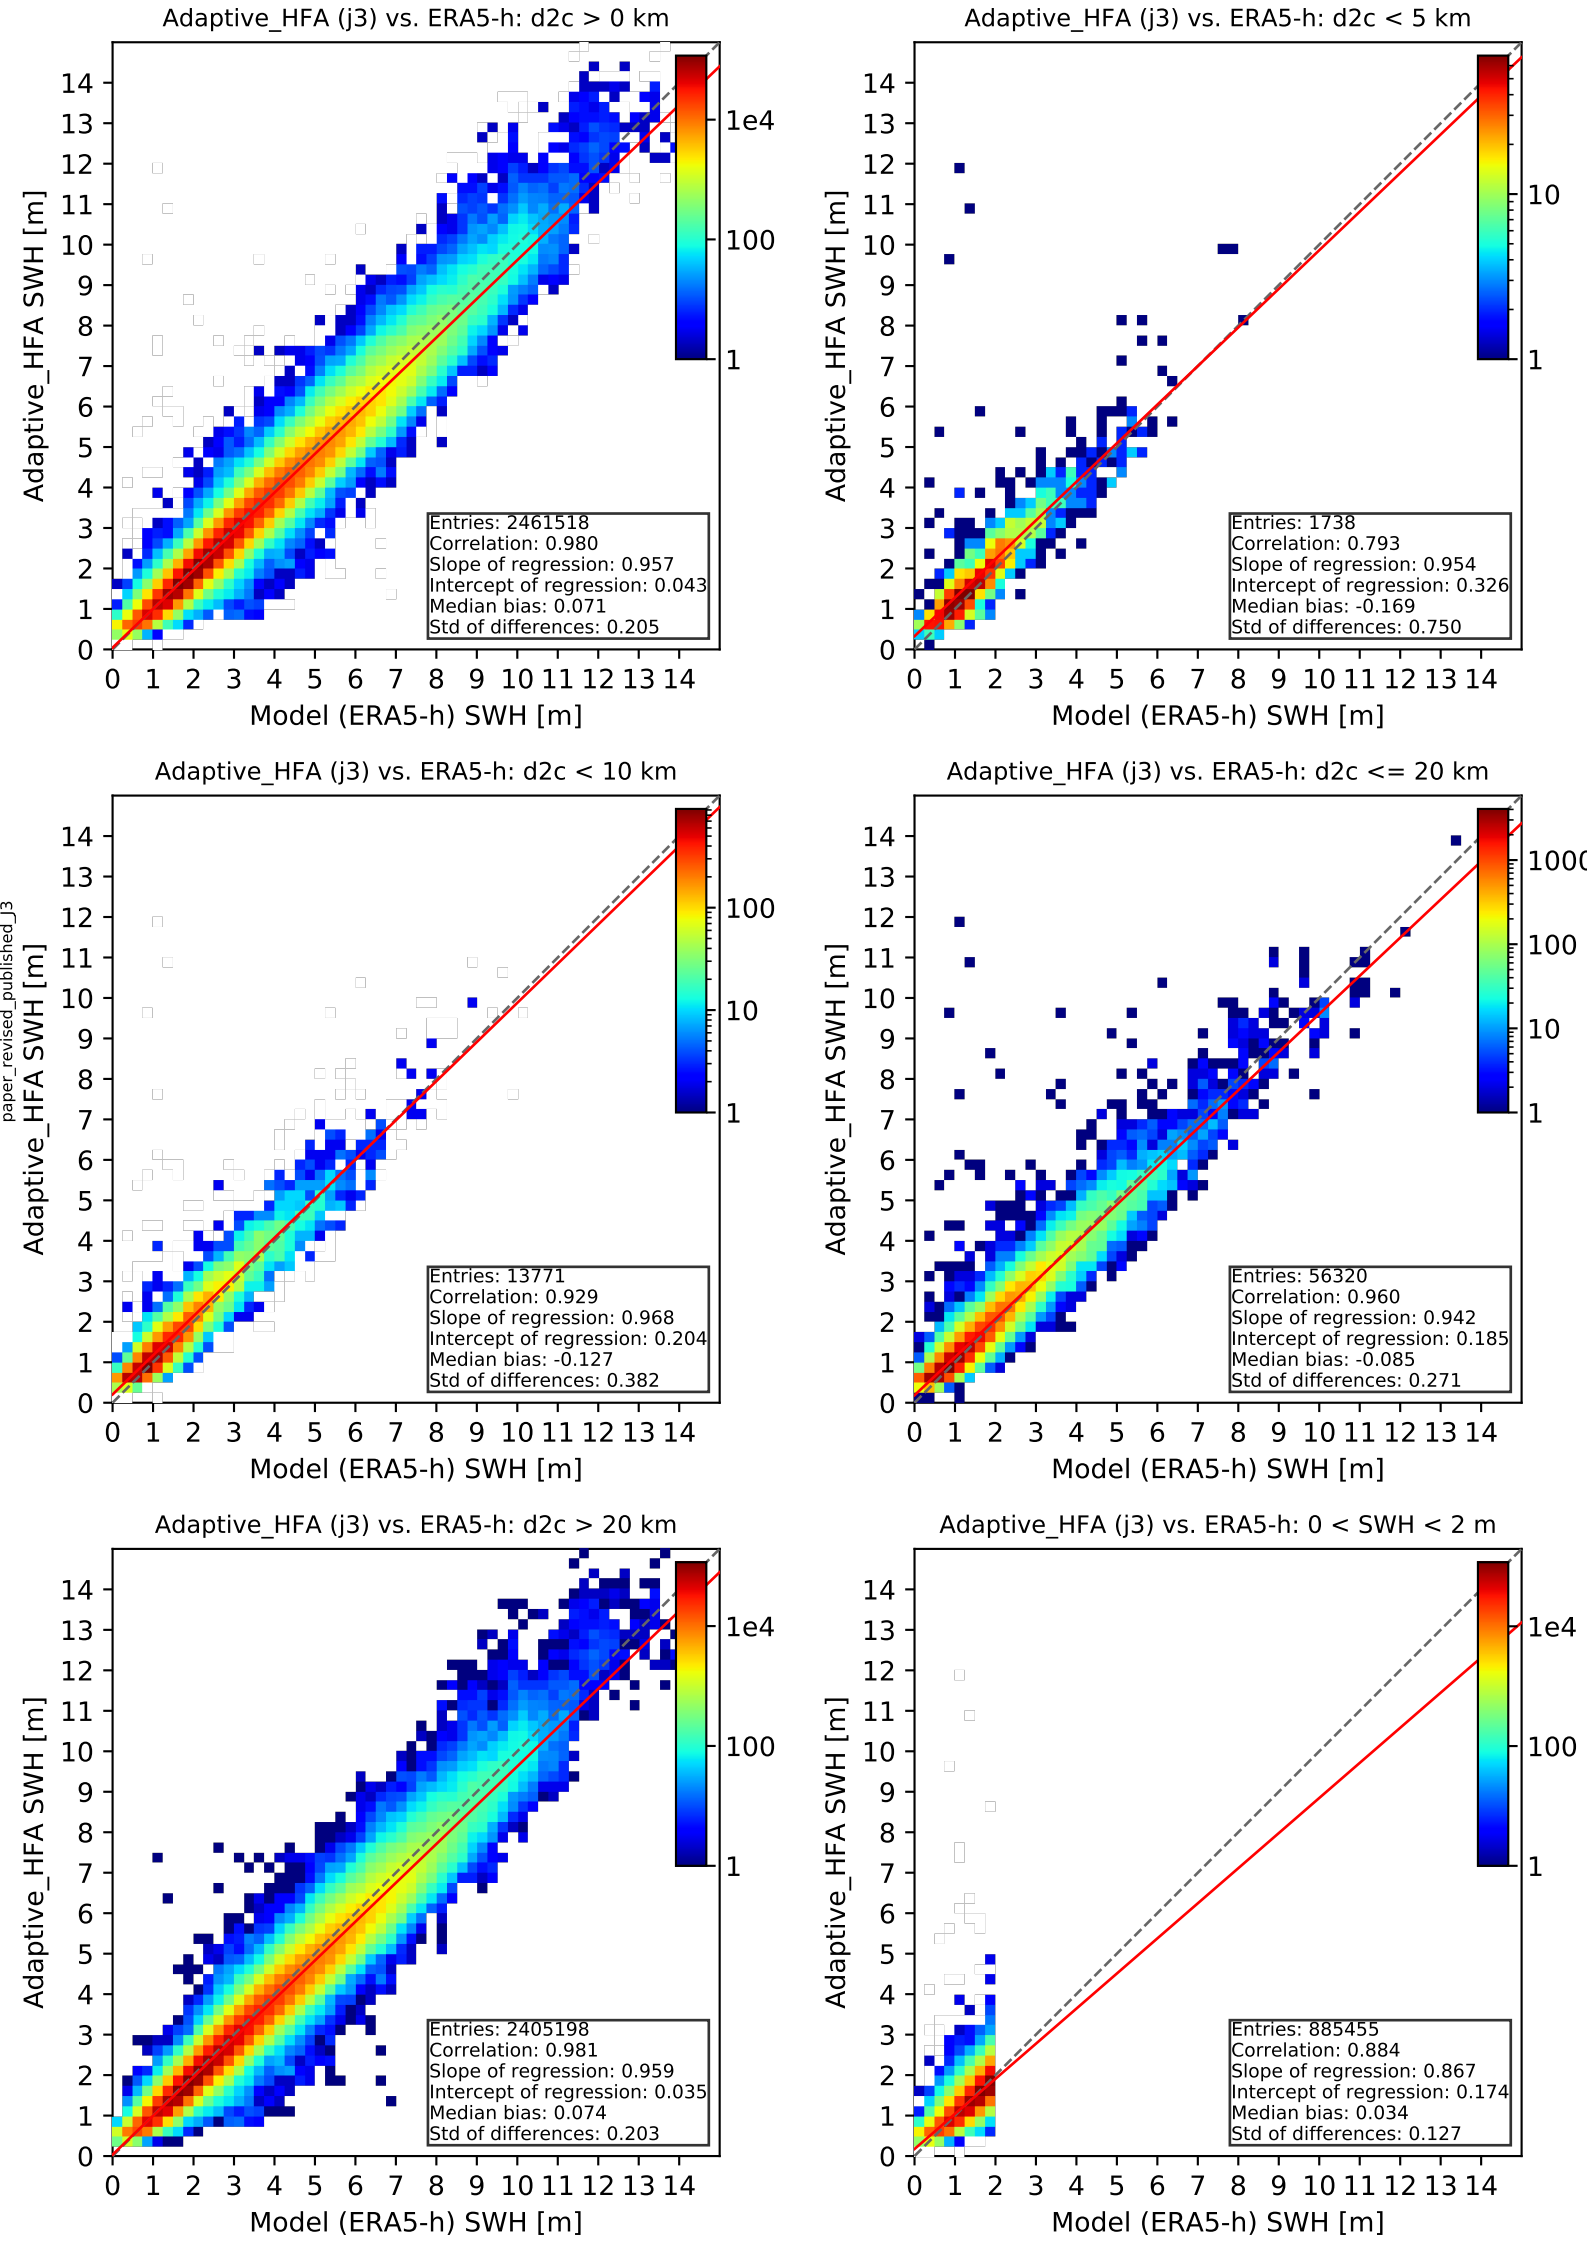

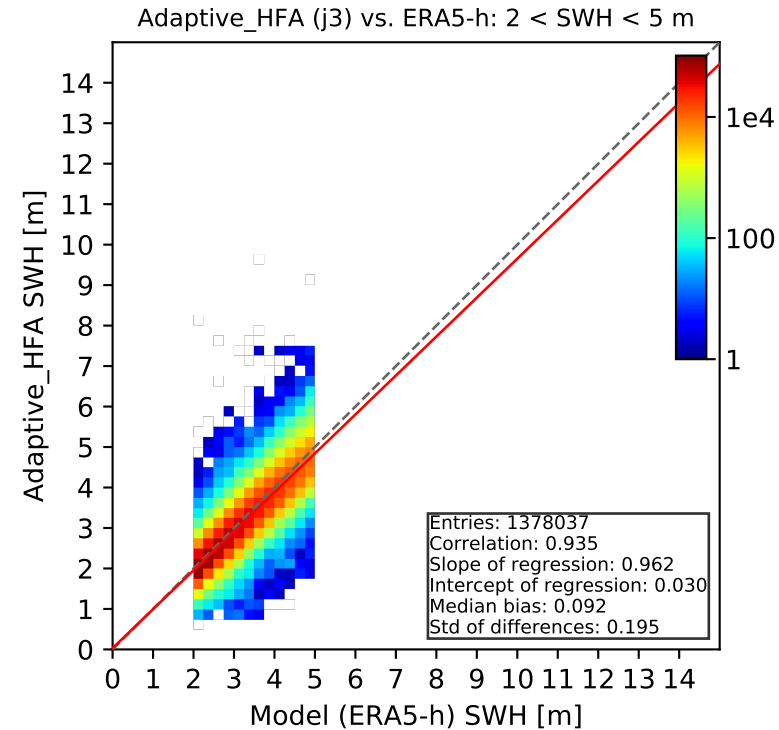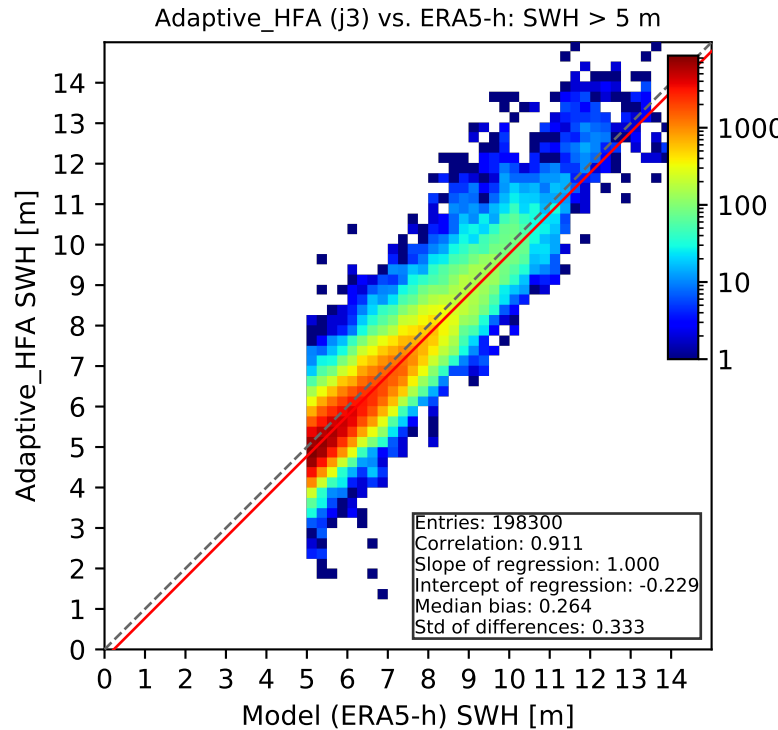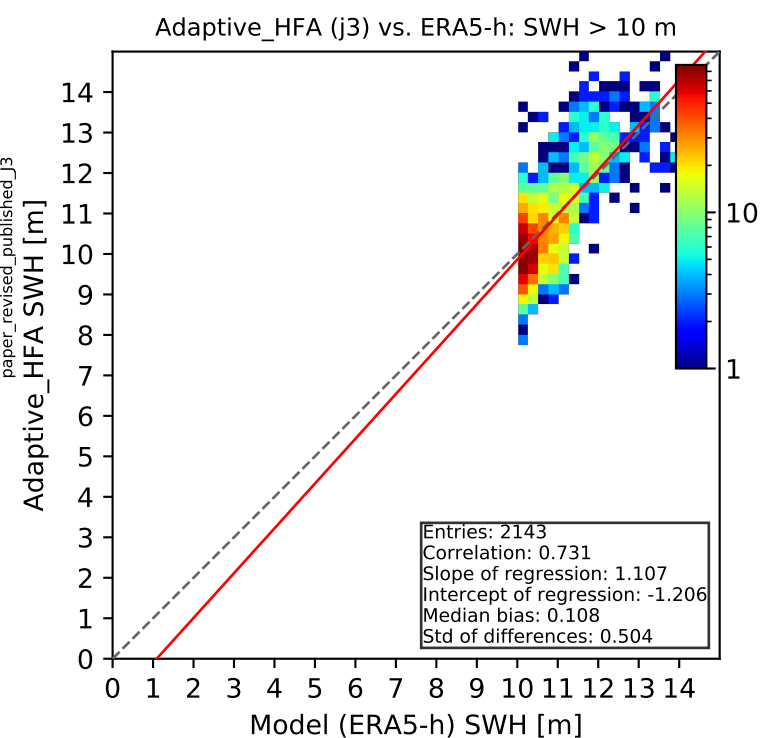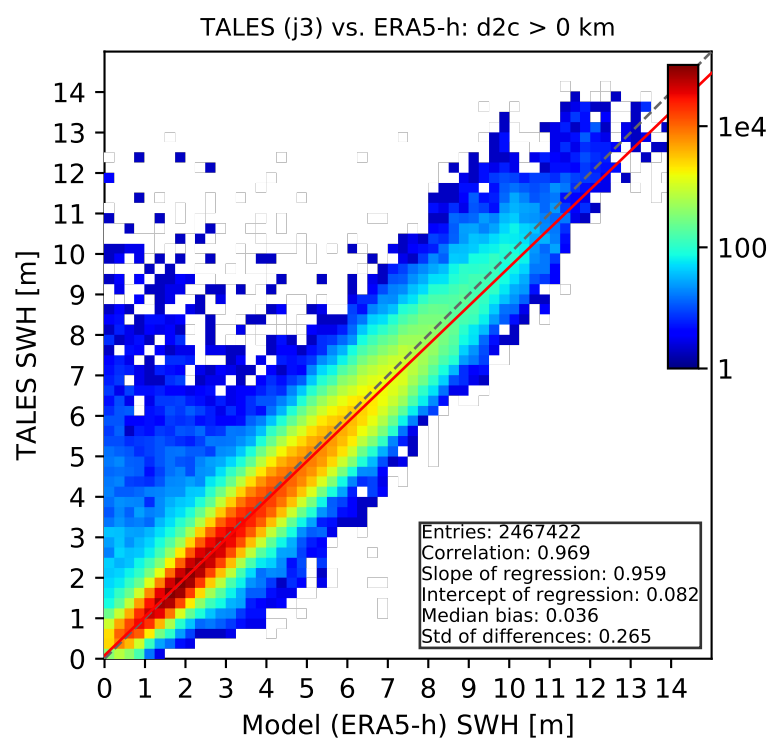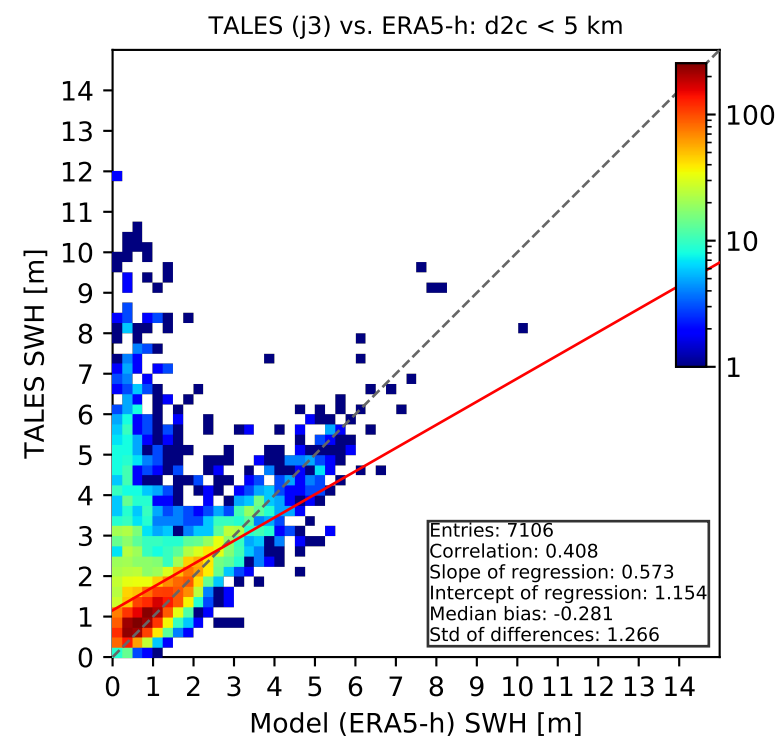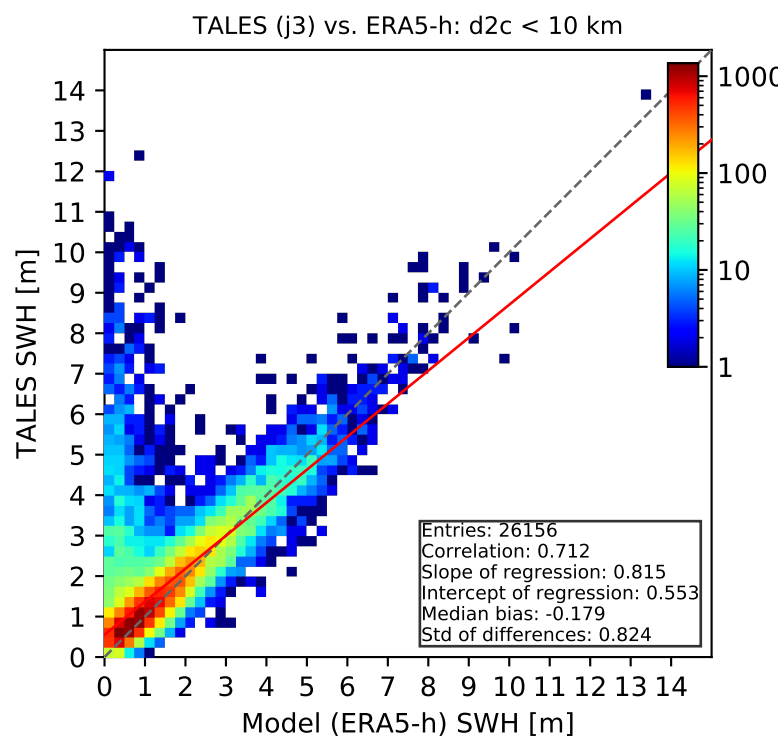

TALES (j3) vs. ERA5-h: d2c &lt;= 20 km

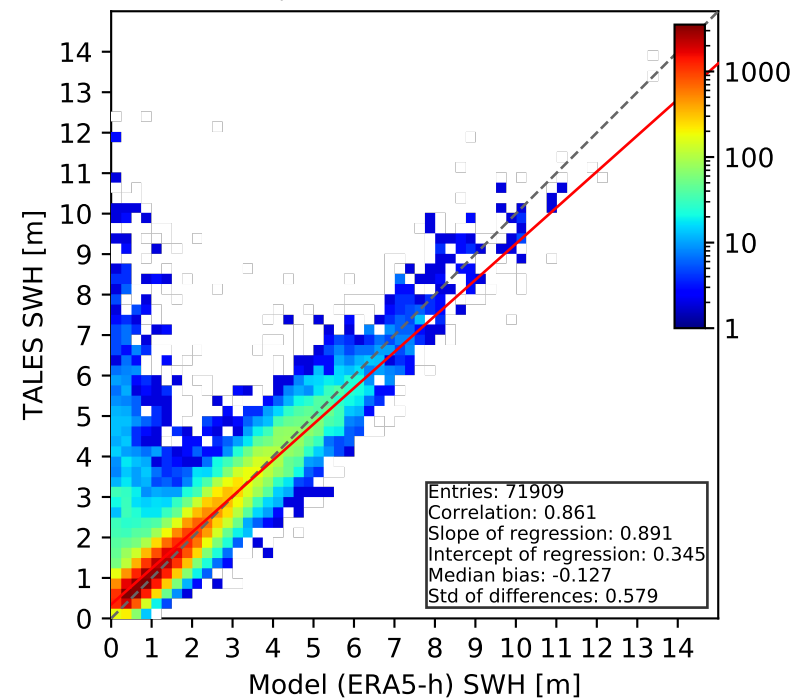

TALES (j3) vs. ERA5-h: d2c &gt; 20 km

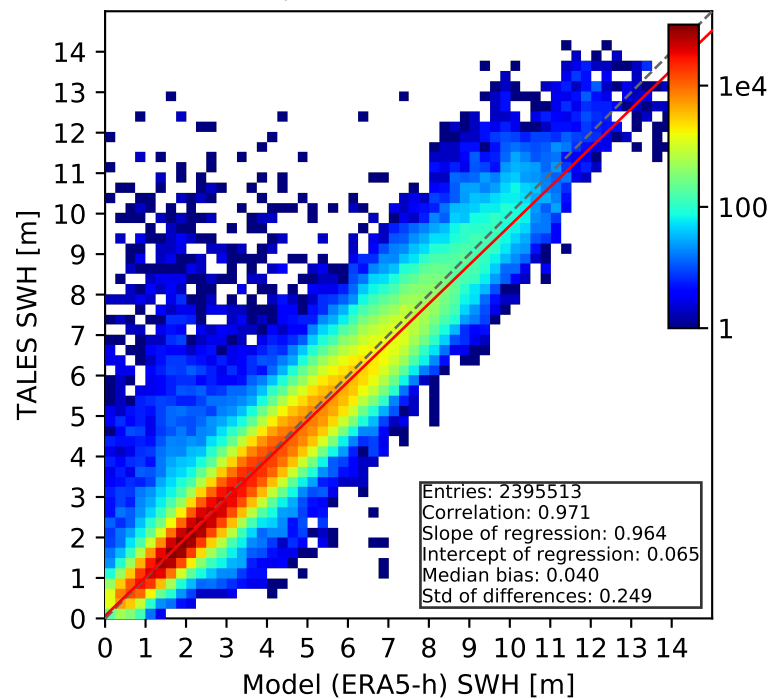

TALES (j3) vs. ERA5-h: 0 &lt; SWH &lt; 2 m

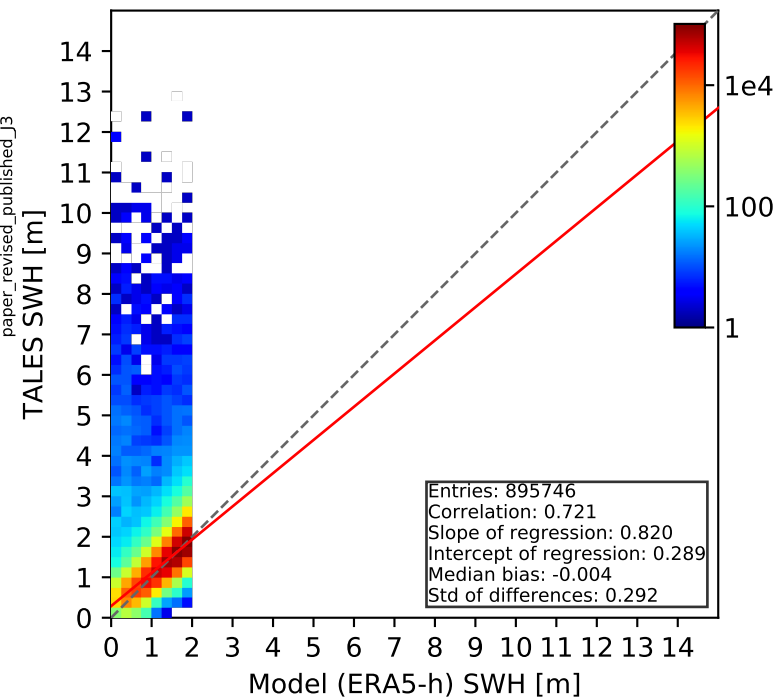

TALES (j3) vs. ERA5-h: 2 &lt; SWH &lt; 5 m

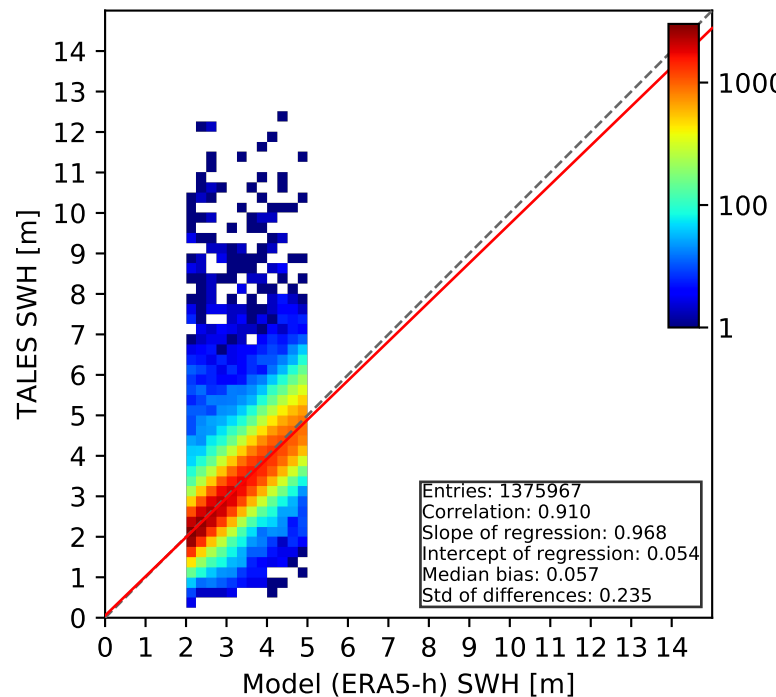

TALES (j3) vs. ERA5-h: SWH &gt; 5 m

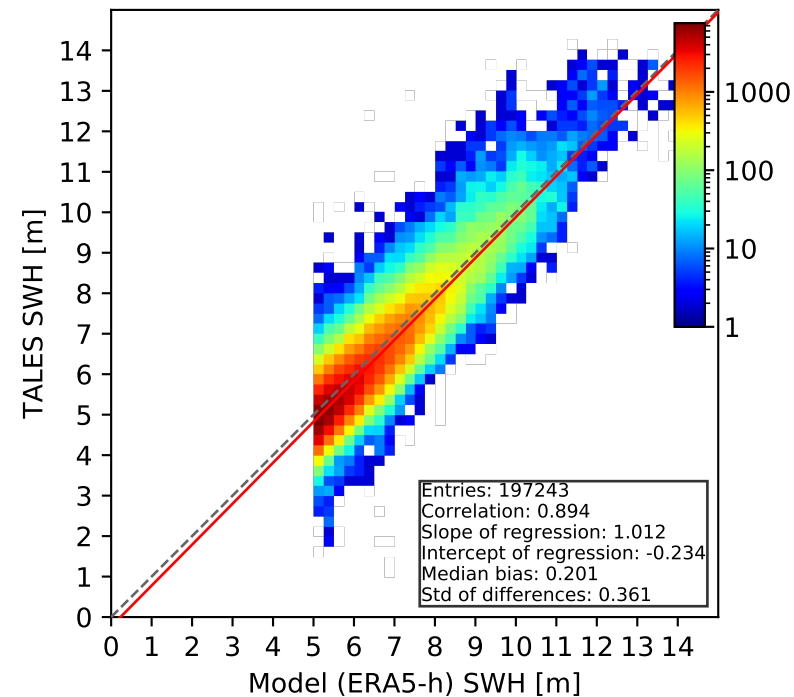

TALES (j3) vs. ERA5-h: SWH &gt; 10 m

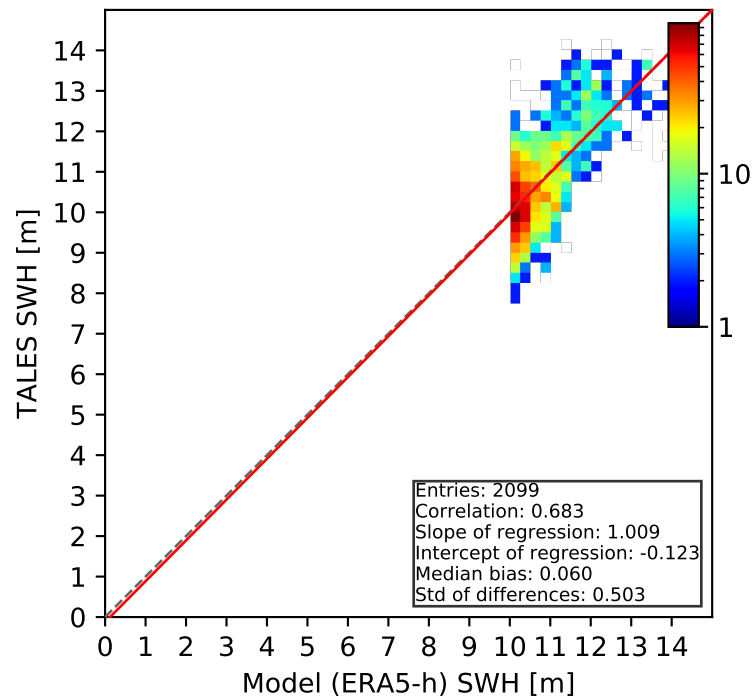

STARv2 (j3) vs. ERA5-h: d2c &gt; 0 km

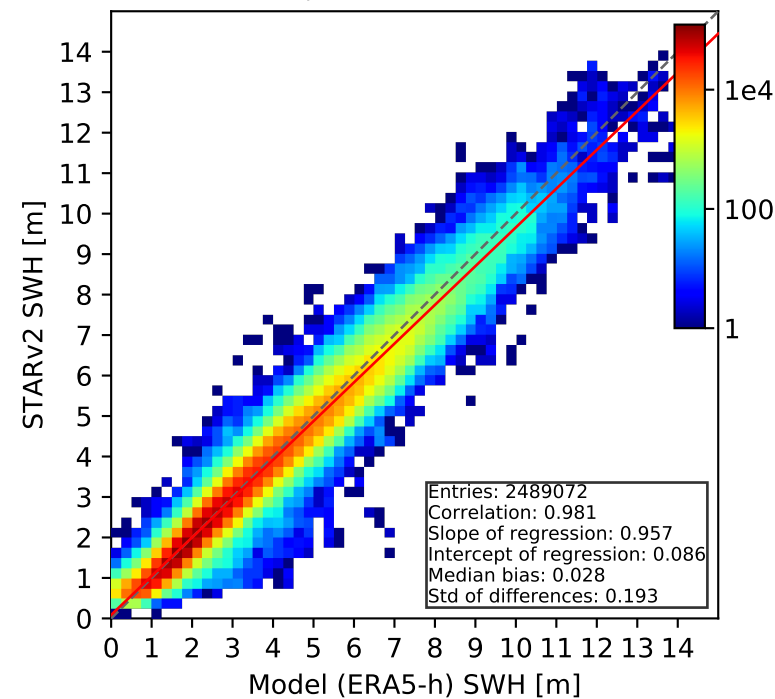

STARv2 (j3) vs. ERA5-h: d2c &lt; 5 km

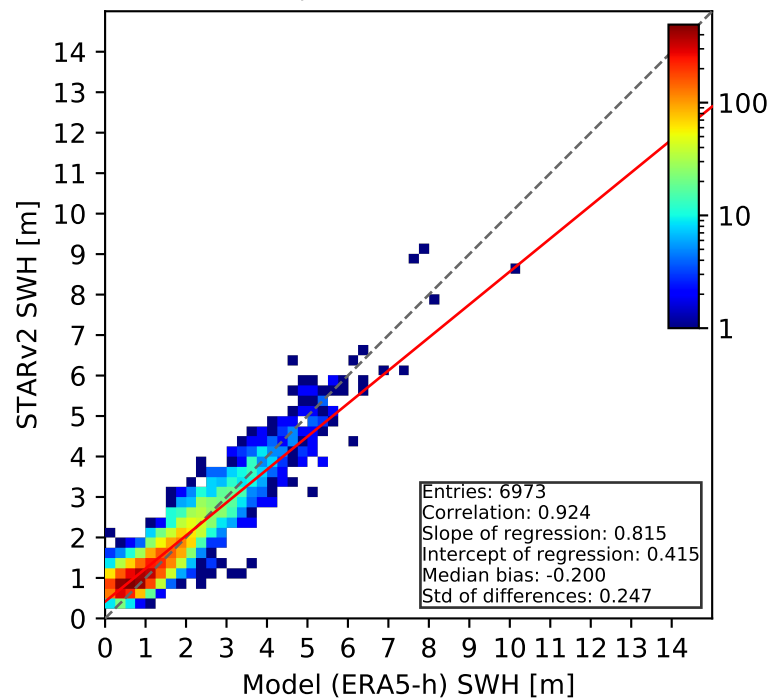

STARv2 (j3) vs. ERA5-h: d2c &lt; 10 km

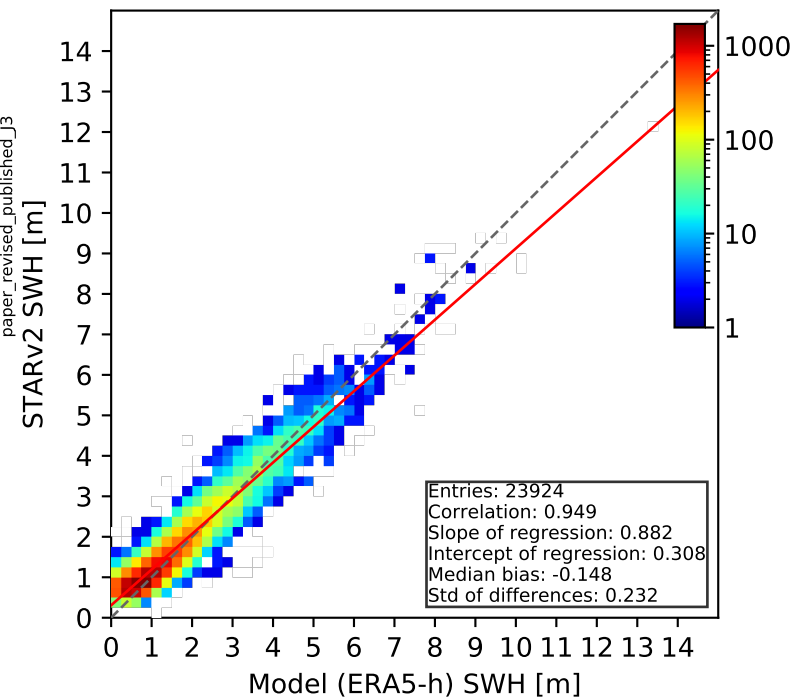

STARv2 (j3) vs. ERA5-h: d2c &lt;= 20 km

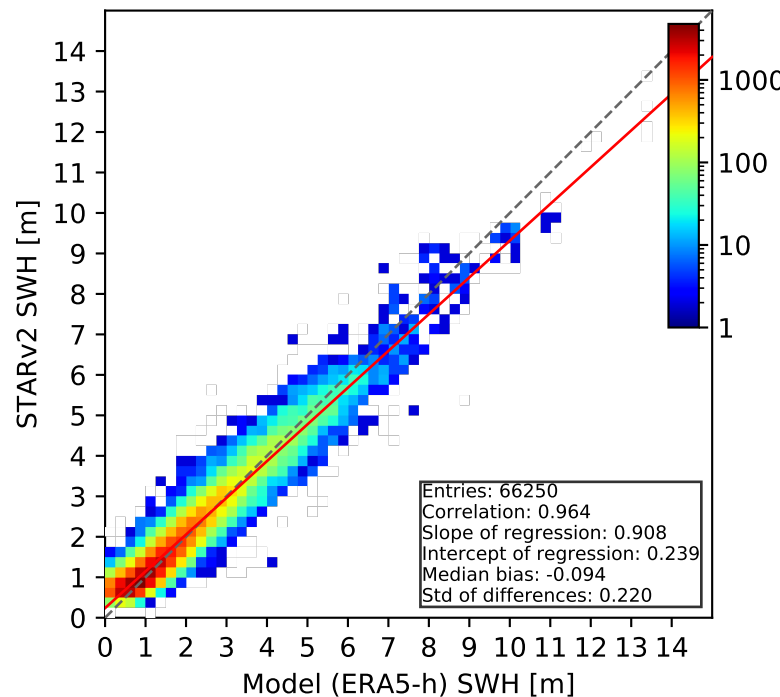

STARv2 (j3) vs. ERA5-h: d2c &gt; 20 km

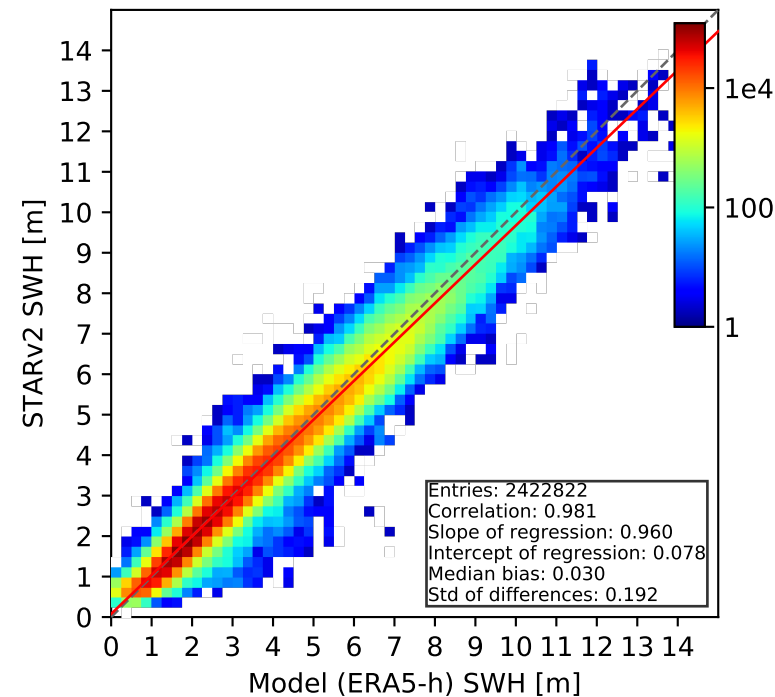

STARv2 (j3) vs. ERA5-h: 0 &lt; SWH &lt; 2 m

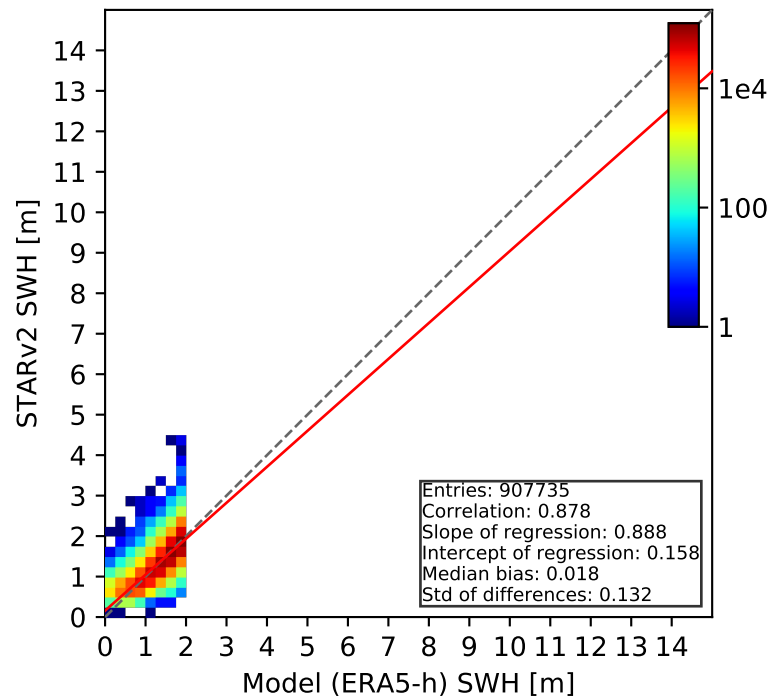

STARv2 (j3) vs. ERA5-h: 2 &lt; SWH &lt; 5 m

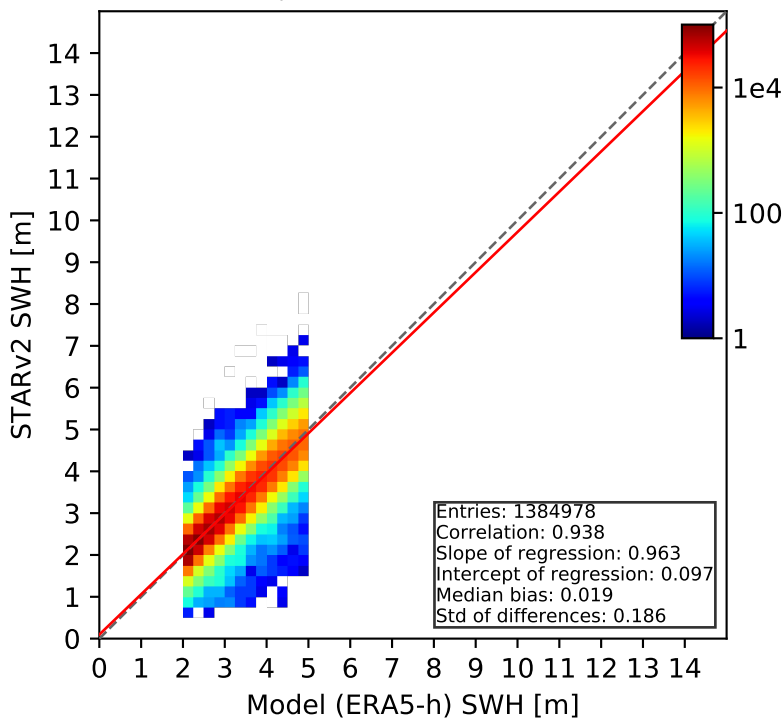

STARv2 (j3) vs. ERA5-h: SWH &gt; 5 m

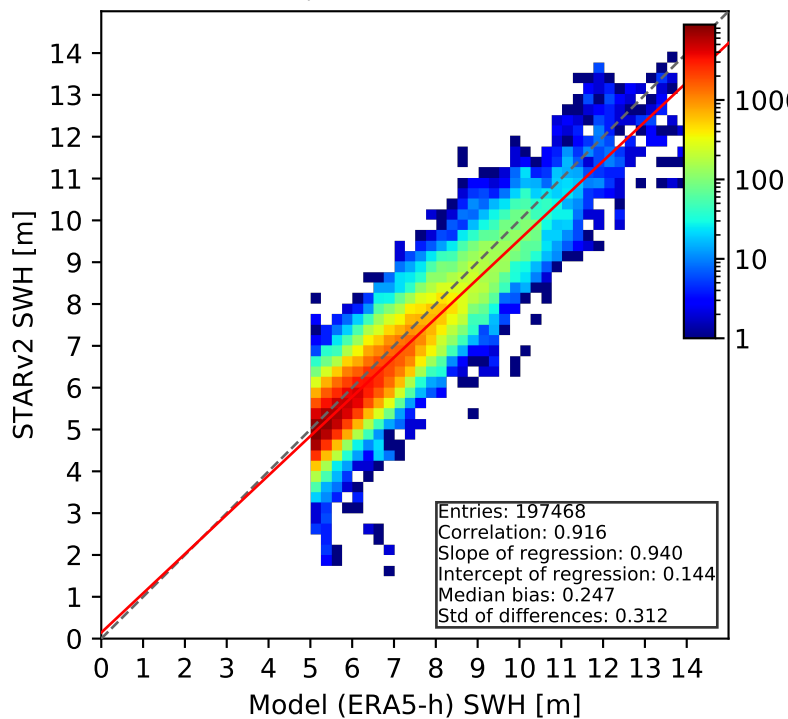

STARv2 (j3) vs. ERA5-h: SWH &gt; 10 m

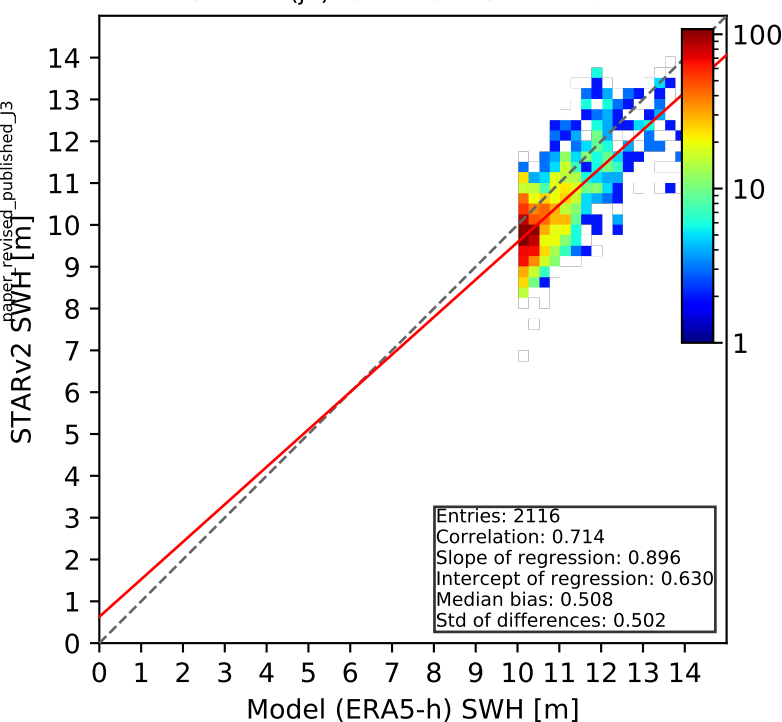

paper\_revised\_published\_j3

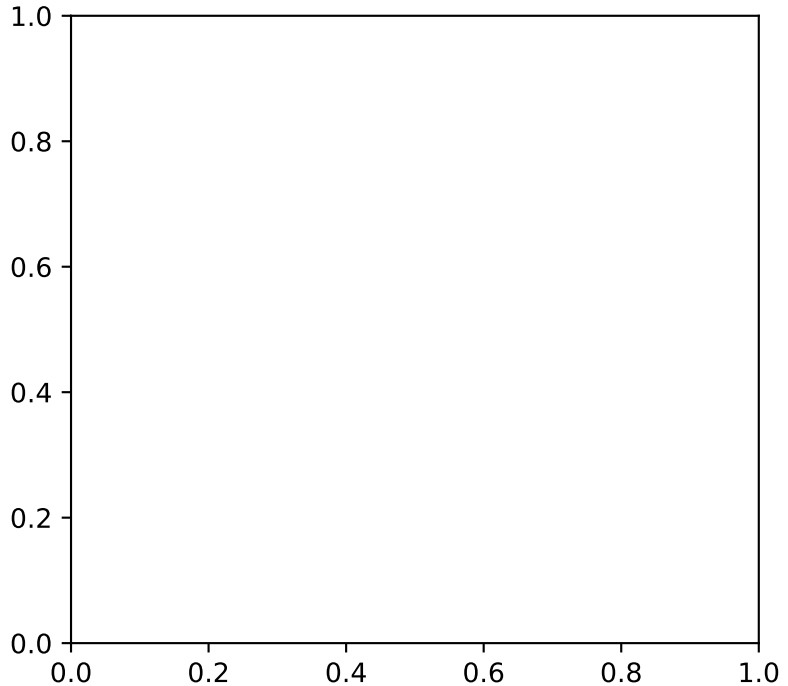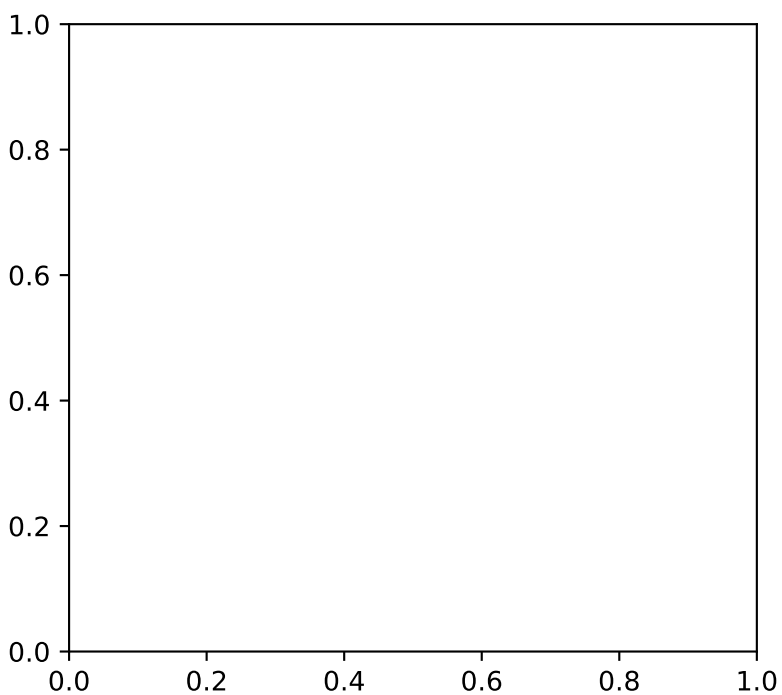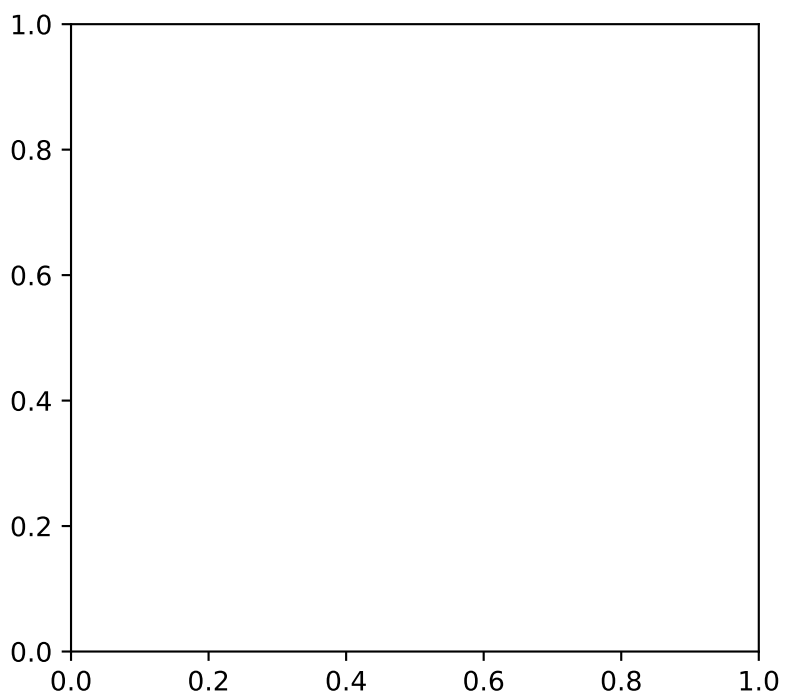

Supplement: s1 [file s1]
